# Supplementary material for: Easy wide scope access to luminescent fluorophosphoranes
Source: Royal Society of Chemistry journal article supplement (doi:10.1039/d1cc00976a), 2021-01-01
Supplement: d1cc00976a1.pdf [file d1cc00976a1.pdf]

## Wide Scope Easy Access to Luminescent Fluorophosphoranes

Jaime Ponce-de-León, Rebeca Infante, and Pablo Espinet\*

IU CINQUIMA/Química Inorgánica, Facultad de Ciencias, Universidad de Valladolid,  
47071-Valladolid (Spain)

*\*To whom correspondence should be addressed: [espinet@qi.uva.es](mailto:espinet@qi.uva.es)*

### Table of Contents

|                                                                                                                                                                                                                                                                       |    |
|-----------------------------------------------------------------------------------------------------------------------------------------------------------------------------------------------------------------------------------------------------------------------|----|
| Experimental General Section .....                                                                                                                                                                                                                                    | 2  |
| Literature Methods for the Synthesis of Biphenyls and Fluorinated Biphenyls. ....                                                                                                                                                                                     | 3  |
| Synthesis and characterization of compounds.....                                                                                                                                                                                                                      | 3  |
| Synthesis of fluorophosphoranes: general procedure .....                                                                                                                                                                                                              | 3  |
| 5,5-dicyclohexyl-1,2,3,4,5-pentafluoro-5 <i>H</i> -5 $\lambda^5$ -benzo[b]phosphindole (5) .....                                                                                                                                                                      | 3  |
| 1,2,3,4,5-pentafluoro-5,5-diphenyl-5 <i>H</i> -5 $\lambda^5$ -benzo[b]phosphindole (6).....                                                                                                                                                                           | 4  |
| 5,5-dicyclohexyl-1,2,3,4,5,6,7,8,9-nonafluoro-5 <i>H</i> -5 $\lambda^5$ -benzo[b]phosphindole (7) .....                                                                                                                                                               | 4  |
| 1,2,3,4,5,6,7,8,9-nonafluoro-5,5-diphenyl-5 <i>H</i> -5 $\lambda^5$ -benzo[b]phosphindole (8).....                                                                                                                                                                    | 5  |
| 5,5-dicyclohexyl-5-fluoro-5 <i>H</i> -5 $\lambda^5$ -benzo[b]phosphindole (11) .....                                                                                                                                                                                  | 6  |
| 5-fluoro-5,5-diphenyl-5 <i>H</i> -5 $\lambda^5$ -benzo[b]phosphindole (13) .....                                                                                                                                                                                      | 7  |
| 5,5-dicyclohexyl-5-fluoro-2,3-dimethoxy-5 <i>H</i> -5 $\lambda^5$ -benzo[b]phosphindole (15).....                                                                                                                                                                     | 7  |
| 5-fluoro-2,3-dimethoxy-5,5-diphenyl-5 <i>H</i> -5 $\lambda^5$ -benzo[b]phosphindole (17) .....                                                                                                                                                                        | 8  |
| Dicyclohexyl(2'-fluoro-[1,1'-biphenyl]-2-yl)phosphane (10) .....                                                                                                                                                                                                      | 8  |
| (2'-fluoro-[1,1'-biphenyl]-2-yl)diphenylphosphane (12) .....                                                                                                                                                                                                          | 9  |
| 2-bromo-2'-fluoro-4,5-dimethoxy-1,1'-biphenyl (9-OMe) .....                                                                                                                                                                                                           | 10 |
| Dicyclohexyl(2'-fluoro-4,5-dimethoxy-[1,1'-biphenyl]-2-yl)phosphane (14) .....                                                                                                                                                                                        | 10 |
| (2'-fluoro-4,5-dimethoxy-[1,1'-biphenyl]-2-yl)diphenylphosphane (16) .....                                                                                                                                                                                            | 11 |
| N,N,N',N'-tetraethyl-1-(2'-fluoro-[1,1'-biphenyl]-2-yl)phosphanediamine, N,N,N',N'-<br>tetraethyl-5-fluoro-5 <i>H</i> -5 $\lambda^5$ -benzo[b]phosphindole-5,5-diamine (18) and 5,5-<br>bis(diethylamino)-5 <i>H</i> -benzo[b]phosphindol-5-ium chloride (18-Cl)..... | 12 |
| 2,4,6,2',4',6'-hexafluorobiphenyl .....                                                                                                                                                                                                                               | 13 |
| Photophysical properties.....                                                                                                                                                                                                                                         | 14 |
| Determination of kinetic constant and activation barrier .....                                                                                                                                                                                                        | 16 |
| Computational General Section .....                                                                                                                                                                                                                                   | 19 |
| X-ray Crystallography Data .....                                                                                                                                                                                                                                      | 22 |
| NMR Spectra .....                                                                                                                                                                                                                                                     | 24 |
| References .....                                                                                                                                                                                                                                                      | 52 |

## Experimental General Section

All the manipulations were performed under N<sub>2</sub> or Ar atmosphere by means of standard Schlenk techniques. Solvents were dried using a solvent purification system SPS PS-MD-5 or distilled from appropriate drying agents,<sup>1</sup> and were sparged with nitrogen gas. CDCl<sub>3</sub> was vacuum-transferred from CaH<sub>2</sub> and degassed using freeze-pump-thaw technique. Solvents for experiments in an inert atmosphere were stored into flame-dried Schlenk flasks over freshly activated 3 or 4 Å molecular sieves. Commercially available chemicals were purchased from Sigma Aldrich, Alfa Aesar, Fluorochem and Acros Organics and were used without further purification. 2',3',4',5',6'-pentafluoro-[1,1'-biphenyl]-2-yl)diphenylphosphine,<sup>2</sup> dicyclohexyl(2',3',4',5',6'-pentafluoro-[1,1'-biphenyl]-2-il)phosphine, (perfluoro-[1,1'-biphenyl]-2-il)diphenylphosphine, dicyclohexyl(perfluoro-[1,1'-biphenyl]-2-il)phosphine,<sup>3</sup> 2-bromo-2'-fluoro-1,1'-biphenyl,<sup>4</sup> were prepared by reported methods. Flash chromatography was carried out using silica gel (230-240 mesh) and oxygen-free solvents. Chemical yields refer to pure isolated substances.

NMR spectra were recorded with Bruker Avance 400 Ultrashield and Varian 500/54 Premium Shielded instruments equipped with variable-temperature probes. Chemical shifts are reported in ppm referenced to tetramethylsilane (<sup>1</sup>H), CCl<sub>3</sub>F (<sup>19</sup>F), and 85% H<sub>3</sub>PO<sub>4</sub> (<sup>31</sup>P), with positive shifts downfield, at 298 K unless otherwise stated. The temperature for the NMR probe was measured with an ethylene glycol standard (high temperature) using standard methods.<sup>5</sup> In the <sup>19</sup>F and <sup>31</sup>P NMR spectra registered in non-deuterated solvents, a coaxial tube containing acetone-*d*<sub>6</sub> was used to maintain the <sup>2</sup>H lock signal.

IR spectra were obtained on an FT-IR spectrometer equipped with an ATR accessory. Intensities are reported relative to the most intense peak of the spectrum and are defined as follows: w (weak, % T between 0 and 33.3%), medium (m, between 33.3% and 66.6%), and strong (s, between 66.6% and 100%).

HRMS (EI) were performed with a MALDI Bruker Autoflex at the LTI facilities of Valladolid University (Spain). Elemental analysis were carried out with a Carlo Erba 1108 Elemental Analyser at the services of Vigo University (Spain).

Luminescence studies were carried out at the PCT facilities of the University of Burgos. Absorption spectra were recorded in a UV-VIS FLS980 Spectrophotometer (Edinburgh Instruments) equipped with a detector (200-1000 nm) that is allowed for absorbance measurements. Steady-state fluorescence measurements were carried out by using a FLS980 fluorescence spectrometer with a 450W Xe lamp as a light source and double excitation and emission monochromators. Monochromator at 400 nm was used at the excitation and emission arms. A photomultiplier tube detector cooled by a Peltier system was used for detection. To measure the emission lifetimes and photoluminescence quantum yield (QY) the FLS980 fluorescence spectrometer is equipped with an integrating sphere. A rectangular 10 mm cuvette was used for the fluorescence measurements. All data were measured at 25 °C.

## Literature Methods for the Synthesis of Biphenyls and Fluorinated Biphenyls.

A wide variety of methods with great functional group tolerance have been reported and their references can be found at the end of this document.<sup>4,6,7,8,9,10,11,12,13,14,15,16</sup> These methodologies can be applied to obtain the desired phosphine precursor.

## Synthesis and characterization of compounds

### Synthesis of fluorophosphoranes: general procedure

A flame-dried, nitrogen-purged Schlenk flask was charged with the corresponding fluorobiarylphosphine (300 mg) and the minimal amount of solvent (1-3 mL) to dissolve it at room temperature. Then, it was placed in an oil bath at the reaction temperature. The reaction progress was checked by <sup>19</sup>F and <sup>31</sup>P NMR. Once the starting phosphine was not observed, the Schlenk was cooled down to room temperature and the solvent removed under vacuum. The final product was purified by recrystallization to yield a crystalline solid, which was stored in a vial at -30 °C under N<sub>2</sub> atmosphere.

### 5,5-dicyclohexyl-1,2,3,4,5-pentafluoro-5*H*-5λ<sup>5</sup>-benzo[*b*]phosphindole (5)

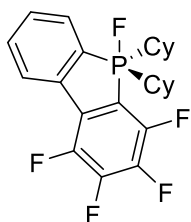

This compound was obtained following the general procedure from dicyclohexyl(2',3',4',5',6'-pentafluoro-[1,1'-biphenyl]-2-yl)phosphine (300 mg, 0.681 mmol) in toluene. It was purified by recrystallization in *n*-hexane at -30 °C to obtain a colourless crystalline solid (246.0 mg, 82.0 % yield).

**HRMS (EI)** Calculated for C<sub>24</sub>H<sub>26</sub>F<sub>4</sub>P [M-F]<sup>+</sup>: 421.1703. Experimental [M-F]<sup>+</sup>: 421.1718.

**Elemental analysis.** C<sub>24</sub>H<sub>26</sub>F<sub>5</sub>P. Calculated %: C, 65.45; H, 5.95. Experimental %: C, 65.67; H, 5.82.

**<sup>1</sup>H NMR** (499.72 MHz, CDCl<sub>3</sub>) δ 8.17 (dd, *J* = 11.6, 7.8 Hz, 1H), 8.09 – 8.03 (m, 1H), 7.57 (t, *J* = 7.5 Hz, 1H), 7.44 – 7.36 (m, 1H), 2.38 – 2.29 (m, 4H), 1.85 – 1.66 (m, 4H), 1.65 – 1.52 (m, 4H), 1.35 – 1.13 (m, 8H), 1.12 – 0.99 (m, 2H).

**<sup>19</sup>F NMR** (470.16 MHz, CDCl<sub>3</sub>) -47.59 (d, *J* = 704.2 Hz, 1F), -130.95 – -132.17 (m, 1F), -143.71 (t, *J* = 18.9 Hz, 1F), -154.18 – -155.44 (m, 1F), -156.10 (td, *J* = 19.3, 3.8 Hz, 1F).

**<sup>31</sup>P{<sup>1</sup>H} NMR** (202.30 MHz, CDCl<sub>3</sub>) δ -55.9 (dd, *J* = 704.2, 19.2 Hz, 1P).

**<sup>13</sup>C{<sup>1</sup>H} NMR** (125.67 MHz, CDCl<sub>3</sub>) δ 144.8 (ddd, *J* = 236.3, 9.5, 2.8 Hz, 1C), 144.0 (dd, *J* = 257.2, 10.9 Hz, 1C), 140.7 (dddd, *J* = 250.4, 17.3, 13.2, 3.9 Hz, 1C), 140.1 (br d, *J* = 11.7 Hz, 1C), 140.0 (ddd, *J* = 258.5, 22.2, 13.0 Hz, 1C), 139.3 (dd, *J* = 13.7, 8.7 Hz, 1C), 136.1 – 134.6 (m, 1C), 133.1 (d, *J* = 2.9 Hz, 1C), 131.5 (dd, *J* = 157.2, 40.9 Hz, 1C), 128.6 (d, *J* = 14.3 Hz, 1C), 125.3 (t, *J* = 12.7 Hz, 1C), 122.8 – 121.0 (m, 1C), 46.6 (dd, *J* = 112.2, 34.3 Hz, 2C), 30.4 (br s, 2C), 28.1 (d, *J* = 5.3 Hz, 2C), 27.2 (d, *J* = 18.3 Hz, 2C), 26.8 (d, *J* = 17.2 Hz, 2C), 26.0 (d, *J* = 2.0 Hz, 2C).

**IR** (ATR, cm<sup>-1</sup>) 2918 (m), 2852 (m), 1589 (w), 1493 (m), 1480 (m), 1435 (s), 1371 (m), 1267 (m), 1181 (w), 1121 (w), 1084 (m), 1070 (m), 1006 (s), 896 (w), 854 (m), 775 (m), 742

(m), 695 (m), 639 (m), 554 (s), 531 (s), 507 (m), 487 (m), 458 (m), 437 (m), 398 (m), 358 (w), 324 (w), 306 (w).

### 1,2,3,4,5-pentafluoro-5,5-diphenyl-5H-5 $\lambda^5$ -benzo[b]phosphindole (6)

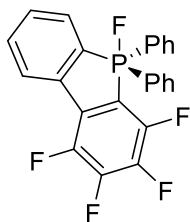

This compound was obtained following the general procedure from (2',3',4',5',6'-pentafluoro-[1,1'-biphenyl]-2-yl)diphenylphosphine (300 mg, 0.700 mmol) in toluene. It was purified by recrystallization from a CH<sub>2</sub>Cl<sub>2</sub>/*n*-hexane mixture at -30 °C to obtain a colourless crystalline solid (254.7 mg, 84.9 % yield).

X-ray-quality crystals were grown by slow evaporation of a chloroform solution at room temperature.

**HRMS (EI)** Calculated for C<sub>24</sub>H<sub>14</sub>F<sub>5</sub>P [M-F]<sup>+</sup>: 409.0764. Experimental [M-F]<sup>+</sup>: 409.0764.

**Elemental analysis.** C<sub>24</sub>H<sub>14</sub>F<sub>5</sub>P. Calculated %: C, 67.30; H, 3.29. Experimental %: C, 67.22; H, 3.38.

**<sup>1</sup>H NMR** (499.72 MHz, CDCl<sub>3</sub>) δ 8.36 (dd, *J* = 12.8, 7.8 Hz, 1H), 8.25 (dd, *J* = 7.6, 4.9 Hz, 1H), 7.79 – 7.66 (m, 5H), 7.55 – 7.47 (m, 1H), 7.47 – 7.39 (m, 2H), 7.42 – 7.33 (m, 4H).

**<sup>19</sup>F NMR** (470.16 MHz, CDCl<sub>3</sub>) δ 0.51 (d, *J* = 656.6 Hz, 1F), -129.53 – -132.60 (m, 1F), -143.73 (t, *J* = 17.7 Hz, 1F), -154.11 (dd, *J* = 23.6, 19.9 Hz, 1F), -154.83 (td, *J* = 19.2, 5.0 Hz, 1F).

**<sup>31</sup>P{<sup>1</sup>H} NMR** (202.30 MHz, CDCl<sub>3</sub>) δ -70.8 (dd, *J* = 657.0, 13.5 Hz, 1P).

**<sup>13</sup>C{<sup>1</sup>H} NMR** (125.67 MHz, CDCl<sub>3</sub>) δ 144.9 (d, *J* = 243.3 Hz, 1C), 144.0 (dd, *J* = 257.5, 12.0 Hz, 1C), 141.3 (d, *J* = 251.2 Hz, 1C), 140.6 – 140.4 (m, 1C), 140.4 (ddd, *J* = 259.5, 20.6, 12.7 Hz, 1C), 139.7 (d, *J* = 9.9 Hz, 1C), 136.3 (dd, *J* = 159.2, 35.0 Hz, 2C), 135.5 (s, 1C), 134.6 (d, *J* = 3.6 Hz, 1C), 131.9 (dd, *J* = 160.9, 26.3 Hz, 1C), 130.3 (d, *J* = 3.7 Hz, 2C), 129.7 (dd, *J* = 12.1, 1.7 Hz, 4C), 129.3 (d, *J* = 15.0 Hz, 1C), 128.6 (d, *J* = 16.6 Hz, 4C), 126.0 (t, *J* = 13.2 Hz, 1C), 120.8 – 120.2 (m, 1C).

**IR** (ATR, cm<sup>-1</sup>) 3059 (w), 1628 (w), 1586 (w), 1492 (m), 1482 (m), 1438 (m), 1373 (m), 1273 (m), 1135 (w), 1119 (m), 1090 (m), 1066 (m), 1011 (s), 962 (w), 884 (w), 857 (m), 777 (w), 761 (w), 737 (s), 726 (s), 691 (s), 640 (m), 618 (w), 564 (s), 542 (s), 524 (s), 508 (s), 501 (s), 478 (s), 436 (m), 401 (w), 376 (w), 355 (m), 305 (w).

### 5,5-dicyclohexyl-1,2,3,4,5,6,7,8,9-nonafluoro-5H-5 $\lambda^5$ -benzo[b]phosphindole (7)

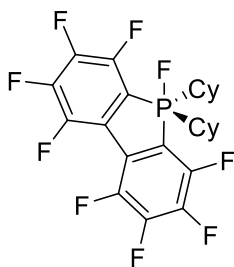

This compound was obtained following the general procedure from dicyclohexyl(perfluoro-[1,1'-biphenyl]-2-yl)phosphine (300 mg, 0.585 mmol) in toluene. It was purified by recrystallization in *n*-hexane at -30 °C to obtain a yellow crystalline solid (234.3 mg, 78.1 % yield).

X-ray-quality crystals were grown by slow evaporation of a chloroform solution at room temperature.



**$^{13}\text{C}\{^1\text{H}\}$  NMR** (125.67 MHz,  $\text{CDCl}_3$ )  $\delta$  152.8 (dd,  $J = 264.8, 11.1$  Hz, 1C), 143.6\* (1C), 143.2\* (1C), 145.5\* (1C), 144.3\* (1C), 142.5\* (1C), 141.8\* (1C), 141.3\* (1C), 136.1 (d,  $J = 24.3$  Hz, 1C), 136.0 (dd,  $J = 163.1, 48.1$  Hz, 2C), 131.2 (d,  $J = 3.7$  Hz, 2C), 130.5 (dd,  $J = 12.4, 3.9$  Hz, 4C), 128.9 (d,  $J = 16.7$  Hz, 4C), 123.3 (br s, 1C), 115.7 (ddd,  $J = 165.6, 40.4, 11.8$  Hz, 1C), 114.7 (br s, 1C). \*Determined by  $^{13}\text{C}$ - $^{19}\text{F}$  HSQC.

**IR** (ATR,  $\text{cm}^{-1}$ ) 3083 (w), 1614 (w), 1497 (m), 1474 (s), 1457 (s), 1439 (s), 1382 (m), 1311 (m), 1293 (m), 1261 (m), 1245 (m), 1106 (s), 1072 (s), 1035 (m), 1000 (m), 938 (m), 840 (w), 789 (m), 741 (s), 716 (m), 709 (m), 688 (s), 651 (m), 631 (s), 612 (s), 558 (s), 524 (s), 506 (s), 482 (m), 467 (m), 373 (w), 346 (w), 322 (w), 307 (w).

### 5,5-dicyclohexyl-5-fluoro-5*H*-5 $\lambda^5$ -benzo[b]phosphindole (11)

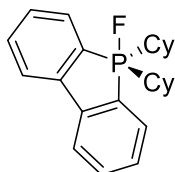

This compound was obtained following the general procedure from dicyclohexyl(2'-fluoro-[1,1'-biphenyl]-2-yl)phosphane (300 mg, 0.814 mmol) in diglyme. It was purified by recrystallization from a  $\text{CH}_2\text{Cl}_2/n$ -hexane at  $-30^\circ\text{C}$  to obtain a colourless crystalline solid (257.4 mg, 85.8 % yield).

X-ray-quality crystals were grown by slow evaporation of a chloroform solution at room temperature.

**HRMS (EI)** Calculated for  $\text{C}_{24}\text{H}_{30}\text{P}$   $[\text{M}-\text{F}]^+$ : 349.2080. Experimental  $[\text{M}-\text{F}]^+$ : 349.2080.

**Elemental analysis.**  $\text{C}_{24}\text{H}_{30}\text{FP}$ . Calculated %: C, 78.23; H, 8.21. Experimental %: C, 78.49; H, 7.95.

**$^{19}\text{F}$  NMR** (376.48 MHz, Toluene- $d_8$ )  $\delta$  -31.45 (d,  $J = 680.3$  Hz, 1F).

**$^{31}\text{P}\{^1\text{H}\}$  NMR** (161.98 MHz, Toluene- $d_8$ )  $\delta$  -59.3 (d,  $J = 680.4$  Hz, 1P).

**$^1\text{H}$  NMR** (400.14 MHz, Toluene- $d_8$ , 232 K)  $\delta$  8.67 – 8.49 (m, 1H), 7.42 (d,  $J = 30.2$  Hz, 2H), 7.25 – 6.90 (m, 5H), 2.40 (s, 2H), 2.25 (t,  $J = 11.7$  Hz, 2H), 2.13 – 1.97 (m, 2H), 1.70 (s, 2H), 1.52 – 1.11 (m, 10H), 1.03 (t,  $J = 12.9$  Hz, 2H), 0.73 (t,  $J = 12.8$  Hz, 2H).

**$^{19}\text{F}$  NMR** (376.48 MHz, Toluene- $d_8$ , 232 K)  $\delta$  -32.94 (d,  $J = 681.4$  Hz, 1F).

**$^{31}\text{P}\{^1\text{H}\}$  NMR** (161.98 MHz, Toluene- $d_8$ , 232 K)  $\delta$  -59.6 (d,  $J = 681.5$  Hz, 1P).

**$^{13}\text{C}\{^1\text{H}\}$  NMR** (100.63 MHz, Toluene- $d_8$ , 232 K) 153.0 (d,  $J = 56.5$  Hz, 1C), 145.3 (d,  $J = 17.7$  Hz, 1C), 140.1 (t,  $J = 10.6$  Hz, 1C), 139.3 (d,  $J = 12.4$  Hz, 1C), 132.4 (s, 2C), 132.2 (dd,  $J = 157.7, 49.2$  Hz, 1C), 128.0\* (1C), 128.7\* (1C), 120.4 (d,  $J = 12.7$  Hz, 1C), 119.3 (s, 2C), 45.6 (dd,  $J = 110.0, 37.9$  Hz, 2C), 31.0 (s, 2C), 27.7 (s, 2C), 27.4 – 26.7 (m, 4C), 26.3 (s, 2C).

\*Determined by  $^{13}\text{C}$ - $^1\text{H}$  HMBC.

**IR** (ATR,  $\text{cm}^{-1}$ ) 3060 (w), 2914 (m), 2845 (m), 1578 (w), 1437 (m), 1257 (m), 1180 (m), 1115 (m), 1075 (m), 1063 (m), 1002 (m), 918 (w), 894 (m), 882 (m), 854 (m), 817 (w), 769 (m), 760 (m), 743 (s), 723 (s), 689 (m), 670 (s), 619 (m), 574 (s), 543 (s), 512 (s), 487 (s), 449 (m), 439 (m), 425 (s), 407 (m), 369 (w), 336 (w).

### 5-fluoro-5,5-diphenyl-5*H*-5 $\lambda^5$ -benzo[*b*]phosphindole (13)

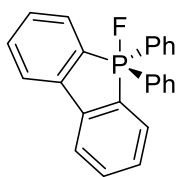

This compound was obtained following the general procedure from (2'-fluoro-[1,1'-biphenyl]-2-yl)diphenylphosphane (300 mg, 0.841 mmol) in diglyme. It was purified by recrystallization from a CH<sub>2</sub>Cl<sub>2</sub>/*n*-hexane at -30 °C to obtain a colourless solid (190.4 mg, 63.4 % yield).

**HRMS (EI)** Calculated for C<sub>24</sub>H<sub>18</sub>P [M-F]<sup>+</sup>: 337.1141. Experimental [M-F]<sup>+</sup>: 337.1144.

**Elemental analysis.** C<sub>24</sub>H<sub>18</sub>FP. Calculated %: C, 80.89; H, 5.09. Experimental %: C, 80.98; H, 5.19.

**<sup>1</sup>H NMR** (499.72 MHz, Toluene-*d*<sub>8</sub>, 233 K)  $\delta$  8.91 – 8.32 (m, 1H), 7.74 (dd, *J* = 15.4, 7.5 Hz, 4H), 7.60 – 7.49 (m, 1H), 7.41 (d, *J* = 7.7 Hz, 1H), 7.24 (t, *J* = 7.5 Hz, 1H), 7.09 – 7.02 (m, 1H), 7.00 – 6.85 (m, 7H), 6.78 (t, *J* = 7.3 Hz, 1H), 6.75 – 6.64 (m, 1H).

**<sup>19</sup>F NMR** (470.17 MHz, Toluene-*d*<sub>8</sub>, 233 K)  $\delta$  11.34 (d, *J* = 638.5 Hz, 1F).

**<sup>31</sup>P{<sup>1</sup>H} NMR** (202.29 MHz, Toluene-*d*<sub>8</sub>, 233 K)  $\delta$  -69.3 (d, *J* = 638.3 Hz, 1P).

**<sup>13</sup>C{<sup>1</sup>H} NMR** (125.67 MHz, Toluene-*d*<sub>8</sub>, 233 K)  $\delta$  153.2 (d, *J* = 21.5 Hz, 1C), 152.8 (d, *J* = 21.5 Hz, 1C), 146.0 (dd, *J* = 22.2, 4.1 Hz, 1C), 140.5 (dd, *J* = 11.6, 9.3 Hz, 1C), 139.1 (s, 1C), 138.7 (s, 1C), 138.0 (d, *J* = 15.9 Hz, 1C), 137.9 (s, 1C), 133.9 (d, *J* = 3.0 Hz, 2C), 133.5 (d, *J* = 42.1 Hz, 1C), 132.3 (d, *J* = 41.9 Hz, 1C), 131.5 (dd, *J* = 11.8, 3.4 Hz, 4C), 131.3 (d, *J* = 5.8 Hz, 2C), 129.6 (d, *J* = 3.4 Hz, 4C), 121.4 – 120.8 (m, 1C), 119.4 (d, *J* = 3.9 Hz, 1C).

**IR** (ATR, cm<sup>-1</sup>) 1590.79 (w), 1481.13 (w), 1439.55 (w), 1260.55 (w), 1117.17 (w), 1073.78 (w), 769.36 (w), 749.16 (m), 739.32 (m), 732.58 (s), 720.63 (m), 692.3 (m), 680.35 (m), 618.64 (w), 559.75 (s), 550.97 (s), 541.66 (m), 528.14 (s), 514.08 (s), 493.28 (m), 481.62 (m), 450.01 (m), 419.91 (w), 403.16 (w), 369.11 (w), 312.75 (w), 290.07 (w), 268.8 (w).

### 5,5-dicyclohexyl-5-fluoro-2,3-dimethoxy-5*H*-5 $\lambda^5$ -benzo[*b*]phosphindole (15)

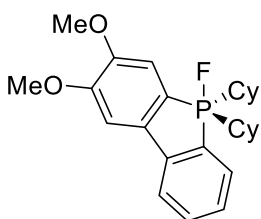

This compound was obtained following the general procedure from dicyclohexyl(2'-fluoro-4,5-dimethoxy-[1,1'-biphenyl]-2-yl)phosphane (300 mg, 0.700 mmol) in diglyme. It was purified by recrystallization from a CH<sub>2</sub>Cl<sub>2</sub>/*n*-hexane at -30 °C to obtain a colourless crystalline solid (273.9 mg, 91.3 % yield).

**HRMS (EI)** Calculated for C<sub>26</sub>H<sub>34</sub>O<sub>2</sub>P [M-F]<sup>+</sup>: 409.2291. Experimental [M-F]<sup>+</sup>: 409.2301.

**Elemental analysis.** C<sub>26</sub>H<sub>34</sub>FO<sub>2</sub>P. Calculated %: C, 72.87; H, 8.00. Experimental %: C, 72.79; H, 7.95.

**<sup>1</sup>H NMR** (499.72 MHz, Toluene-*d*<sub>8</sub>, 232 K)  $\delta$  8.06 (d, *J* = 11.3 Hz, 1H), 7.40 (d, *J* = 6.6 Hz, 1H), 7.24 – 7.13 (m, 3H), 7.09 (m, 1H), 3.44 (s, 3H), 3.37 (s, 3H), 2.54 – 2.33 (m, 4H), 2.11 (d, *J* = 14.4 Hz, 2H), 1.76 (d, *J* = 12.8 Hz, 2H), 1.60 – 1.33 (m, 8H), 1.26 (q, *J* = 13.1 Hz, 2H), 1.10 (qt, *J* = 13.0, 3.6 Hz, 2H), 0.96 – 0.77 (m, 2H).

**<sup>19</sup>F NMR** (470.17 MHz, Toluene-*d*<sub>8</sub>, 232 K)  $\delta$  -32.09 (d, *J* = 668.0 Hz, 1F).

**$^{31}\text{P}\{^1\text{H}\}$  NMR** (202.29 MHz, Toluene- $d_8$ , 232 K)  $\delta$  -58.8 (d,  $J$  = 668.4 Hz, 1P).

**$^{13}\text{C}\{^1\text{H}\}$  NMR** (125.67 MHz, Toluene- $d_8$ , 232 K)  $\delta$  153.5 (s, 1C), 153.0 (d,  $J$  = 56.0 Hz, 1C), 149.8 (d,  $J$  = 17.0 Hz, 1C), 139.9 (d,  $J$  = 12.3 Hz, 1C), 139.4 (dd,  $J$  = 18.6, 3.8 Hz, 1C), 123.2 (d,  $J$  = 49.7 Hz, 1C), 121.9 (d,  $J$  = 49.9 Hz, 1C), 120.9 (t,  $J$  = 12.4 Hz, 1C), 118.5 (s, 2C), 102.9 (d,  $J$  = 16.1 Hz, 1C), 54.8 (s, 1C), 54.8 (s, 1C), 45.5 (dd,  $J$  = 110.1, 38.0 Hz, 2C), 31.2 (s, 2C), 27.8 (d,  $J$  = 4.3 Hz, 2C), 27.5 (d,  $J$  = 17.7 Hz, 2C), 27.2 (d,  $J$  = 16.3 Hz, 2C), 26.5 (s, 2C).

**IR** (ATR,  $\text{cm}^{-1}$ ) 2920.76 (m), 2848.23 (m), 1593.28 (m), 1565.77 (w), 1495.85 (m), 1475.09 (m), 1460.82 (m), 1441.57 (m), 1430.35 (m), 1394.97 (m), 1320.91 (m), 1251.93 (s), 1206.86 (s), 1171.92 (m), 1121.37 (m), 1082.05 (m), 1062.61 (m), 1038.59 (m), 1022.54 (m), 928.01 (m), 895.77 (m), 873.82 (m), 863.47 (m), 853.59 (m), 839.56 (m), 798.35 (m), 768.15 (s), 738.98 (m), 725.13 (m), 680.73 (s), 671.98 (m), 573.3 (s), 562.01 (s), 525.81 (s), 503.98 (s), 490.18 (s), 469.23 (s), 441.47 (m), 416.91 (m), 378.49 (m), 301.69 (m), 264.69 (m).

### 5-fluoro-2,3-dimethoxy-5,5-diphenyl-5H- $\lambda^5$ -benzo[b]phosphindole (17)

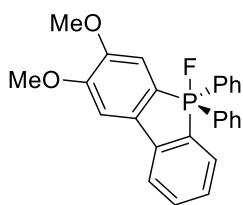

This compound was obtained following the general procedure from (2'-fluoro-4,5-dimethoxy-[1,1'-biphenyl]-2-yl)diphenylphosphane (300 mg, 0.700 mmol) in diglyme. Product was detected by  $^{19}\text{F}$  and  $^{31}\text{P}$  NMR but any attempt to isolate it was unsuccessful, due to its low conversion (39 %) and some phosphine oxide products formation (22 %).

**$^{19}\text{F}$  NMR** (470.17 MHz, diglyme(acetone- $d_6$  cap))  $\delta$  11.10 (d,  $J$  = 623.0 Hz, 1F).

**$^{31}\text{P}\{^1\text{H}\}$  NMR** (202.29 MHz, diglyme(acetone- $d_6$  cap))  $\delta$  -69.6 (d,  $J$  = 623.2 Hz, 1P).

### Dicyclohexyl(2'-fluoro-[1,1'-biphenyl]-2-yl)phosphane (10)

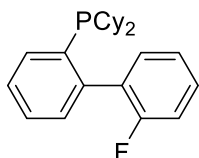

A flame-dried, nitrogen-purged Schlenk flask was charged with 2-bromo-2'-fluoro-1,1'-biphenyl (600 mg, 2.39 mmol) and 20 mL of  $\text{Et}_2\text{O}$ . It was placed in an *i*-PrOH bath at  $-78^\circ\text{C}$  and *n*-BuLi (1.5 mL, 2.4 mmol) was added dropwise. The mixture was stirred for one hour keeping the temperature constant. Next,  $\text{ClPCy}_2$  (0.60 mL, 2.70 mmol) was added and the temperature was kept at  $-78^\circ\text{C}$  for one hour. After that, the reaction mixture was allowed to reach room temperature and subsequently was hydrolysed with two drops of water and taken to dryness. A colourless solid was obtained. The title product was purified by chromatography column under air using *n*-hexane; *n*-hexane/DCM (5:1); DCM as eluent. The product was recrystallized from a *n*-hexane/EtOH mixture at  $-30^\circ\text{C}$  to obtain a colourless crystalline solid (633 mg, 72.0 % yield).

**HRMS (EI)** Calculated for  $\text{C}_{24}\text{H}_{30}\text{FP}$   $[\text{M}+\text{H}]^+$ : 369.2142. Experimental  $[\text{M}+\text{H}]^+$ : 369.2145.

**Elemental analysis.**  $\text{C}_{24}\text{H}_{30}\text{FP}$ . Calculated %: C, 78.23; H, 8.21. Experimental %: C, 77.97; H, 8.29.

**$^1\text{H}$  NMR** (499.72 MHz,  $\text{CDCl}_3$ )  $\delta$  7.63 – 7.59 (m, 1H), 7.43 – 7.37 (m, 2H), 7.36 – 7.30 (m, 1H), 7.29 – 7.24 (m, 1H), 7.22 – 7.13 (m, 2H), 7.11 – 7.06 (m, 1H), 1.82 (s, 2H), 1.77 – 1.52 (m, 10H), 1.33 – 0.95 (m, 10H).

**$^{19}\text{F}$  NMR** (470.16 MHz,  $\text{CDCl}_3$ )  $\delta$  -112.89 – -113.03 (m, 1F).

**$^{31}\text{P}\{^1\text{H}\}$  NMR** (202.30 MHz,  $\text{CDCl}_3$ )  $\delta$  -10.5 (d,  $J$  = 31.5 Hz, 1P).

**$^{13}\text{C}\{^1\text{H}\}$  NMR** (125.67 MHz,  $\text{CDCl}_3$ )  $\delta$  159.3 (d,  $J$  = 244.7 Hz, 1C), 144.2 (d,  $J$  = 31.3 Hz, 1C), 135.4 (d,  $J$  = 20.7 Hz, 1C), 132.7 (d,  $J$  = 3.5 Hz, 1C), 132.5 (t,  $J$  = 3.3 Hz, 1C), 130.6 (dd,  $J$  = 16.2, 7.2 Hz, 1C), 130.4 (d,  $J$  = 5.8 Hz, 1C), 129.0 (d,  $J$  = 8.0 Hz, 1C), 128.4 (s, 1C), 127.1 (s, 1C), 123.1 (d,  $J$  = 3.7 Hz, 1C), 115.1 (d,  $J$  = 22.4 Hz, 1C), 34.4 (br d,  $J$  = 81.2 Hz, 2C), 30.3 (br s, 2C), 29.0 (d,  $J$  = 8.6 Hz, 2C), 27.3 (d,  $J$  = 12.2 Hz, 2C), 27.2 (d,  $J$  = 7.7 Hz, 2C), 26.4 (s, 2C).

### (2'-fluoro-[1,1'-biphenyl]-2-yl)diphenylphosphane (12)

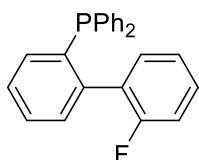

A flame-dried, nitrogen-purged Schlenk flask was charged with 2-bromo-2'-fluoro-1,1'-biphenyl (700 mg, 2.78 mmol) and 20 mL of  $\text{Et}_2\text{O}$ . It was placed in an *i*-PrOH bath at  $-78^\circ\text{C}$  and *n*-BuLi (1.75 mL, 2.8 mmol) was added dropwise. The mixture was stirred for one hour keeping the

temperature constant. Next,  $\text{ClPPh}_2$  (0.57 mL, 3.10 mmol) was added and the temperature was kept at  $-78^\circ\text{C}$  for one hour. After that, the reaction mixture was allowed to reach room temperature and subsequently it was hydrolysed with a saturated  $\text{NH}_4\text{Cl}$  solution under air. The organic layer was separated, and the aqueous layer was extracted with  $\text{Et}_2\text{O}$  (3 x 30 mL). The combined organic extracts were dried over magnesium sulphate, filtered, and taken to dryness. A colourless oil was obtained. The title product was purified by chromatography column under air using *n*-hexane; *n*-hexane/DCM (5:1); as eluent. The product was recrystallized from a *n*-hexane/ $\text{EtOH}$  mixture at  $-30^\circ\text{C}$  to obtain a colourless crystalline solid (740 mg, 74.7 % yield).

**HRMS (EI)** Calculated for  $\text{C}_{24}\text{H}_{19}\text{FP}$   $[\text{M}+\text{H}]^+$ : 357.1208. Experimental  $[\text{M}+\text{H}]^+$ : 357.1203.

**Elemental analysis.**  $\text{C}_{24}\text{H}_{18}\text{FP}$ . Calculated %: C, 80.89; H, 5.89. Experimental %: C, 81.03; H, 6.01.

**$^1\text{H}$  NMR** (499.72 MHz,  $\text{CDCl}_3$ )  $\delta$  7.41 (td,  $J$  = 7.7, 1.4 Hz, 1H), 7.34 – 7.26 (m, 9H), 7.25 – 7.18 (m, 4H), 7.12 – 7.05 (m, 2H), 7.05 – 6.94 (m, 2H).

**$^{19}\text{F}$  NMR** (470.16 MHz,  $\text{CDCl}_3$ )  $\delta$  -113.29 – -113.91 (m, 1F).

**$^{31}\text{P}\{^1\text{H}\}$  NMR** (202.30 MHz,  $\text{CDCl}_3$ )  $\delta$  -12.11 (d,  $J$  = 24.4 Hz, 1P).

**$^{13}\text{C}\{^1\text{H}\}$  NMR** (125.67 MHz,  $\text{CDCl}_3$ )  $\delta$  159.39 (d,  $J$  = 245.7 Hz, 1C), 141.63 (d,  $J$  = 30.1 Hz, 1C), 137.36 (d,  $J$  = 13.4 Hz, 1C), 137.05 (d,  $J$  = 11.5 Hz, 1C), 133.81 (d,  $J$  = 20.0 Hz, 2C), 133.77 (s, 1C), 132.03 (t,  $J$  = 3.6 Hz, 2C), 130.47 (d,  $J$  = 5.1 Hz, 1C), 129.37 (d,  $J$  = 7.9 Hz, 1C), 129.22 – 128.88 (m, 1C), 128.56 (d,  $J$  = 18.0 Hz, 4C), 128.29 (d,  $J$  = 6.9 Hz, 4C), 128.06 (s, 2C), 123.21 (d,  $J$  = 3.7 Hz, 1C), 115.32 (d,  $J$  = 22.4 Hz, 1C).

## 2-bromo-2'-fluoro-4,5-dimethoxy-1,1'-biphenyl (9-OMe)

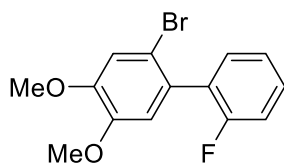

A flame-dried, nitrogen-purged Schlenk flask was charged with 1,2-dibromoveratrole (2.30 g, 7.77 mmol), 2-fluorophenylboronic acid (1.15 g, 8.21 mmol),  $\text{PdCl}_2(\text{CH}_3\text{CN})_2$  (100 mg, 0.38 mmol) and dppf (223 mg, 0.40 mmol).  $\text{N}_2$  spargled DME (8 mL) and water (2 mL) were then added and the mixture was stirred for 5 min at room temperature. Finally,  $\text{K}_2\text{CO}_3$  (2.69 g, 19.4 mmol) was added and the Schlenk was placed in an oil bath at 80 °C. The mixture was stirred for 5 hours keeping the temperature constant. The reaction mixture was allowed to cool to rt, DME was evaporated, and water (10 mL) and EtOAc (20 mL) were added. The layers were separated and the aqueous layer was extracted with EtOAc (3 x 30 mL). The combined organic layers were dried over magnesium sulphate, filtered, and evaporated in vacuo to obtain a yellow oil, which was purified by chromatography column using toluene/*n*-hexane (3:1 to 5:1) as eluent. The product was obtained as a colourless solid (915 mg, 37.8 % yield). Unreacted 1,2-dibromoveratrole and diarylated product 2,2''-difluoro-4',5'-dimethoxy-1,1':2',1''-terphenyl were also recovered.

**HRMS (EI)** Calculated for  $\text{C}_{14}\text{H}_{12}\text{BrFNaO}_2$   $[\text{M}+\text{Na}]^+$ : 332.9902. Experimental  $[\text{M}+\text{Na}]^+$ : 332.9904.

**Elemental analysis.**  $\text{C}_{14}\text{H}_{12}\text{BrFO}_2$ . Calculated %: C, 54.04; H, 3.89. Experimental %: C, 54.00; H, 3.91.

**$^1\text{H}$  NMR** (499.72 MHz,  $\text{CDCl}_3$ )  $\delta$  7.40 – 7.33 (m, 1H), 7.30 (td,  $J$  = 7.5, 1.8 Hz, 1H), 7.20 (td,  $J$  = 7.5, 1.2 Hz, 1H), 7.17 – 7.10 (m, 2H), 6.82 (s, 1H), 3.91 (s, 3H), 3.86 (s, 3H).

**$^{19}\text{F}$  NMR** (470.16 MHz,  $\text{CDCl}_3$ )  $\delta$  -114.06 – -114.22 (m, 1F).

**$^{13}\text{C}\{^1\text{H}\}$  NMR** (125.67 MHz,  $\text{CDCl}_3$ )  $\delta$  159.56 (d,  $J$  = 247.0 Hz, 1C), 149.27 (s, 1C), 148.16 (s, 1C), 131.80 (d,  $J$  = 2.9 Hz, 1C), 129.66 (d,  $J$  = 8.0 Hz, 1C), 128.88 (s, 1C), 128.64 (d,  $J$  = 16.0 Hz, 1C), 123.77 (d,  $J$  = 3.5 Hz, 1C), 115.68 (d,  $J$  = 22.0 Hz, 1C), 115.48 (s, 1C), 114.08 (s, 1C), 113.81 (s, 1C), 56.21 (d,  $J$  = 1.6 Hz, 1C), 56.10 (d,  $J$  = 1.9 Hz, 1C).

## Dicyclohexyl(2'-fluoro-4,5-dimethoxy-[1,1'-biphenyl]-2-yl)phosphane (14)

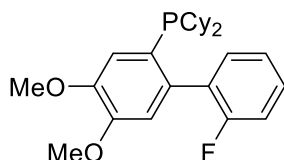

A flame-dried, nitrogen-purged Schlenk flask was charged with 2-bromo-2'-fluoro-4,5-dimethoxy-1,1'-biphenyl (602 mg, 1.93 mmol) and 20 mL of  $\text{Et}_2\text{O}$ . It was placed in an *i*-PrOH bath at -78 °C and *n*-BuLi (1.2 mL, 1.92 mmol) was added dropwise. The mixture was stirred for one hour keeping the temperature constant. Next,  $\text{ClPCy}_2$  (0.50 mL, 2.19 mmol) was added and the temperature was kept at -78 °C for one hour, then the temperature was raised to -50 °C and stirred for one night. After that, the reaction mixture was allowed to reach room temperature and subsequently it was hydrolysed with a saturated  $\text{NH}_4\text{Cl}$  solution. The organic layer was separated, and the aqueous layer was extracted with  $\text{Et}_2\text{O}$  (3 x 30 mL). The combined organic extracts were dried over magnesium sulphate, filtered, and taken to dryness. A yellowish oil was obtained. The title product was purified by chromatography column under air using toluene as eluent.

The product was recrystallized from a Et<sub>2</sub>O/EtOH mixture at -30 °C to obtain a colourless crystalline solid (419 mg, 50.7 % yield).

**HRMS (EI)** Calculated for C<sub>26</sub>H<sub>34</sub>FO<sub>2</sub>P [M+Na]<sup>+</sup>: 451.2178. Experimental [M+Na]<sup>+</sup>: 451.2182.

**Elemental analysis.** C<sub>26</sub>H<sub>34</sub>FO<sub>2</sub>P. Calculated %: C, 72.87; H, 8.00. Experimental %: C, 72.94; H, 8.09.

**<sup>1</sup>H NMR** (499.72 MHz, CDCl<sub>3</sub>) δ 7.35 – 7.29 (m, 1H), 7.19 (td, *J* = 7.4, 2.0 Hz, 1H), 7.17 – 7.12 (m, 1H), 7.11 – 7.05 (m, 2H), 6.77 (d, *J* = 3.2 Hz, 1H), 3.96 (s, 3H), 3.88 (s, 3H), 1.83 – 1.55 (m, 11H), 1.32 – 0.99 (m, 11H).

**<sup>19</sup>F NMR** (470.16 MHz, CDCl<sub>3</sub>) δ -112.86 – -113.30 (m, 1F).

**<sup>31</sup>P{<sup>1</sup>H} NMR** (202.30 MHz, CDCl<sub>3</sub>) δ -10.55 (d, *J* = 28.3 Hz, 1P).

**<sup>13</sup>C{<sup>1</sup>H} NMR** (100.63 MHz, CDCl<sub>3</sub>) δ 159.52 (d, *J* = 244.7 Hz, 1C), 149.21 (s, 1C), 147.89 (s, 1C), 137.61 (d, *J* = 32.9 Hz, 1C), 132.81 (t, *J* = 3.4 Hz, 1C), 130.39 (dd, *J* = 16.2, 7.1 Hz, 1C), 128.89 (d, *J* = 7.9 Hz, 1C), 126.38 (d, *J* = 20.4 Hz, 1C), 123.07 (d, *J* = 3.7 Hz, 1C), 115.47 – 114.57 (m, 2C), 113.23 (d, *J* = 6.9 Hz, 1C), 56.20 (s, 1C), 55.72 (s, 1C), 34.84 (d, *J* = 13.4 Hz, 2C), 30.41 (d, *J* = 17.5 Hz, 2C), 29.06 (d, *J* = 8.2 Hz, 2C), 27.26 (d, *J* = 9.6 Hz, 4C), 26.42 (s, 2C).

### (2'-fluoro-4,5-dimethoxy-[1,1'-biphenyl]-2-yl)diphenylphosphane (16)

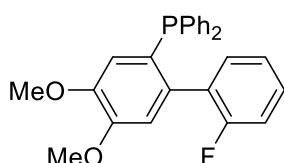

A flame-dried, nitrogen-purged Schlenk flask was charged with 2-bromo-2'-fluoro-4,5-dimethoxy-1,1'-biphenyl (612.5 mg, 1.97 mmol) and 20 mL of Et<sub>2</sub>O. It was placed in an *i*-PrOH bath at -78 °C and *n*-BuLi (1.3 mL, 2.08 mmol) was added dropwise. The mixture was stirred for one hour keeping the temperature constant. Next, ClPPh<sub>2</sub> (0.40 mL, 2.17 mmol) was added and the temperature was kept at -78 °C for one hour, then the temperature was raised to -50 °C and stirred for one night. After that, the reaction mixture was allowed to reach room temperature and subsequently it was hydrolysed with a saturated NH<sub>4</sub>Cl solution. The organic layer was separated, and the aqueous layer was extracted with Et<sub>2</sub>O (3 x 30 mL). The combined organic extracts were dried over magnesium sulphate, filtered, and taken to dryness. A yellowish oil was obtained. The title product was purified by chromatography column under air using toluene as eluent. The product was recrystallized from a Et<sub>2</sub>O/EtOH mixture at -30 °C to obtain a colourless crystalline solid (552 mg, 67.3 % yield).

**HRMS (EI)** Calculated for C<sub>26</sub>H<sub>22</sub>FO<sub>2</sub>P [M+Na]<sup>+</sup>: 439.1234. Experimental [M+Na]<sup>+</sup>: 439.1230.

**Elemental analysis.** C<sub>26</sub>H<sub>22</sub>FO<sub>2</sub>P. Calculated %: C, 74.99; H, 5.33. Experimental %: C, 75.12; H, 5.29.

**<sup>1</sup>H NMR** (499.72 MHz, CDCl<sub>3</sub>) δ 7.32 – 7.27 (m, 7H), 7.26 – 7.21 (m, 4H), 7.15 – 7.09 (m, 1H), 7.08 – 7.01 (m, 2H), 6.85 (d, *J* = 3.8 Hz, 1H), 6.59 (d, *J* = 3.3 Hz, 1H), 3.89 (s, 3H), 3.59 (s, 3H).

**$^{19}\text{F}$  NMR** (470.16 MHz,  $\text{CDCl}_3$ )  $\delta$  -113.45 – -113.68 (m, 1F).

**$^{31}\text{P}\{^1\text{H}\}$  NMR** (202.30 MHz,  $\text{CDCl}_3$ )  $\delta$  -12.71 (d,  $J$  = 23.0 Hz, 1P).

**$^{13}\text{C}\{^1\text{H}\}$  NMR** (100.63 MHz,  $\text{CDCl}_3$ )  $\delta$  159.61 (d,  $J$  = 245.4 Hz, 1C), 149.44 (s, 1C), 148.58 (s, 1C), 137.94 (d,  $J$  = 12.3 Hz, 1C), 135.27 (d,  $J$  = 32.9 Hz, 1C), 133.44 (d,  $J$  = 19.4 Hz, 4C), 132.33 (t,  $J$  = 3.6 Hz, 1C), 129.29 (d,  $J$  = 8.0 Hz, 1C), 129.16 – 128.80 (m, 2C), 128.46 – 128.00 (m, 6C), 127.89 (d,  $J$  = 12.7 Hz, 1C), 123.23 (d,  $J$  = 3.7 Hz, 1C), 116.66 (s, 1C), 115.37 (d,  $J$  = 22.5 Hz, 1C), 113.50 (d,  $J$  = 6.6 Hz, 1C), 55.89 (s, 1C), 55.65 (s, 1C).

**N,N,N',N'-tetraethyl-1-(2'-fluoro-[1,1'-biphenyl]-2-yl)phosphanediamine, N,N,N',N'-tetraethyl-5-fluoro-5H-5 $\lambda^5$ -benzo[b]phosphindole-5,5-diamine (18) and 5,5-bis(diethylamino)-5H-benzo[b]phosphindol-5-ium chloride (18-Cl)**

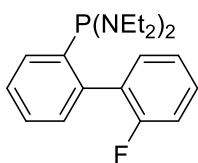

**Synthesis of the phosphine:** A flame-dried, nitrogen-purged Schlenk flask was charged with 2-bromo-2'-fluoro-1,1'-biphenyl (700 mg, 2.78 mmol) and 20 mL of  $\text{Et}_2\text{O}$ . It was placed in an *i*-PrOH bath at  $-78^\circ\text{C}$  and *n*-BuLi (1.75 mL, 2.8 mmol) was added dropwise. The mixture was

stirred for one hour keeping the temperature constant. Next,  $\text{ClP}(\text{NEt}_2)_2$  (1.3 eq) was added and the temperature was kept at  $-78^\circ\text{C}$  for one hour. After that, the reaction mixture was allowed to reach room temperature and the solvent was evaporated under vacuum. The solid obtained was extracted with *n*-hexane and filtered. The colourless solution obtained was taken to dryness to afford a crude yellowish oil which was used for the next step without further purification. The phosphine product was identified by  $^{19}\text{F}$  and  $^{31}\text{P}$  NMR, but the oil also contained unreacted  $\text{ClP}(\text{NEt}_2)_2$ , which had been used in excess.

**$^{19}\text{F}$  NMR** (470.16 MHz, *n*-hexane( $\text{acetone-d}_6$ ))  $\delta$  -115.10 – -115.28 (m, 1F).

**$^{31}\text{P}\{^1\text{H}\}$  NMR** (202.30 MHz, *n*-hexane( $\text{acetone-d}_6$ ))  $\delta$  95.1 (d,  $J$  = 22.9 Hz, 1P).

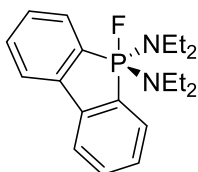

**Synthesis of 18 and 18-Cl:** the previously obtained oil was dissolved in 5 mL of diglyme and heated in a Schlenk flask at  $130^\circ\text{C}$  overnight. A white precipitated was formed in the first 2 hours, the solution turned purple overnight (16 h). The fluorophosphorane (18) was detected in the solution (30 % yield based on NMR) in a mixture of many decomposition byproducts, which prevented its isolation.

**$^{19}\text{F}$  NMR** (376.48 MHz, diglyme( $\text{acetone-d}_6$ ))  $\delta$  -31.15 (d,  $J$  = 689.7 Hz, 1F).

**$^{31}\text{P}\{^1\text{H}\}$  NMR** (161.98 MHz, diglyme( $\text{acetone-d}_6$ ))  $\delta$  -47.9 (d,  $J$  = 690.6 Hz, 1P).

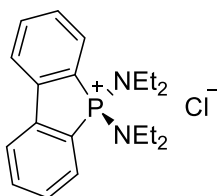

The white solid obtained was filtered and washed with  $\text{Et}_2\text{O}$  (3 x 5 mL), then dried under vacuum. It was identified as a phosphonium chloride (18-Cl). (252.0 mg, 25% yield from starting biaryl), the chloride proceeding from the  $\text{ClP}(\text{NEt}_2)_2$  contaminant. Addition of  $\text{AgClO}_4$  to an acetone solution of 18-Cl leads to precipitation of  $\text{AgCl}$  and formation of 18- $\text{ClO}_4$  (not isolated).

**<sup>1</sup>H NMR** (400.14 MHz, CDCl<sub>3</sub>) δ 8.12 (t, *J* = 8.7 Hz, 2H), 8.08 – 8.00 (m, 2H), 7.82 (t, *J* = 7.7 Hz, 2H), 7.71 – 7.59 (m, 2H), 3.37 (dq, *J* = 13.9, 7.1 Hz, 8H), 1.11 (t, *J* = 7.1 Hz, 12H).

**<sup>31</sup>P{<sup>1</sup>H} NMR** (202.30 MHz, CDCl<sub>3</sub>) δ 52.7 (s, 1P).

### 2,4,6,2',4',6'-hexafluorobiphenyl

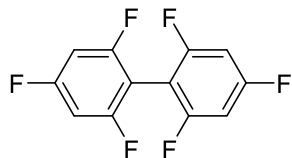

A flame-dried, nitrogen-purged Schlenk flask was charged with 1-bromo-2,4,6-trifluorobenzene (0.27 mL, 2.3 mmol) and 5 mL of Et<sub>2</sub>O. It was placed in an *i*-PrOH bath at -78 °C and *n*-BuLi (1.5 mL, 2.4 mmol) was added dropwise. Reaction was stirred for 1 hour at this temperature and CuCl<sub>2</sub> (162 mg, 1.2 mmol) was added. The reaction was allowed to reach room temperature and it was stirred opened to air for 2 hours. It was hydrolysed with a 2 M HCl solution. The organic layer was separated, and the aqueous layer was extracted with Et<sub>2</sub>O (2 x 5 mL). The combined organic extracts were taken to dryness. The title compound was obtained as colourless needles upon recrystallization from hot *n*-hexane (251 mg, 80 % yield).

**Elemental analysis.** C<sub>12</sub>H<sub>4</sub>F<sub>6</sub>. Calculated %: C, 54.98; H, 1.54. Experimental %: C, 55.03; H, 1.37.

**<sup>1</sup>H NMR** (499.72 MHz, CDCl<sub>3</sub>). 6.84 – 6.75 (m, 4H).

**<sup>19</sup>F NMR** (470.16 MHz, CDCl<sub>3</sub>). δ -105.95 – -106.17 (m, 2F), -107.32 – -107.48 (m, 4F).

The spectroscopic data are in accordance with previously reported data.<sup>17</sup>

## Photophysical properties

Many dibenzophospholes and their tetrahedral P(V) derivatives (frequently phosphine-oxide derivatives) display interesting optoelectronic behaviour centred in their conjugated organic  $\pi$ -systems. Amongst them, several luminescent systems with fluorinated aryls have been studied. The presence of F substituents stabilizes the LUMO orbitals and moves the electronic transitions to higher wavenumbers in spite of their short conjugation length.<sup>18</sup> However, probably due to the scarcity of stable derivatives as the fluorophosphoranes reported here, five-coordinated P(V) derivatives with bpt geometry have not been studied.

All the fluorophosphoranes display fluorescence in THF solution with photoluminescence quantum yields in the range 37.5–6.4, and also in the solid state (12,8–4.5) (Figure ESI1).

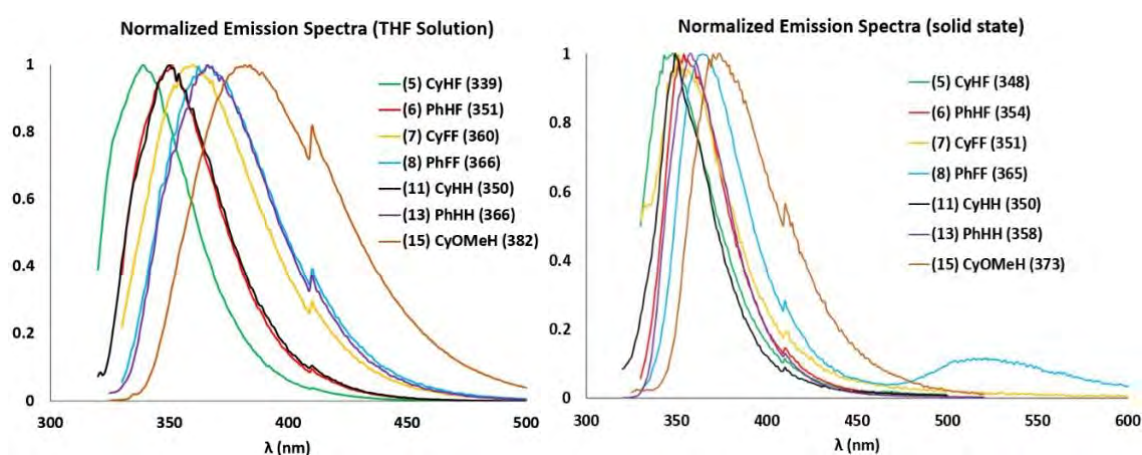

**Figure ESI1.** Normalized emission spectra in THF solution (left) and in the solid state (right). Maxima emission wavelength in parenthesis.

Evaluation of the photophysical properties of fluorophosphoranes in THF solution ( $5 \cdot 10^{-5}$  M) was carried out, and representative data are summarized in Table ESI1. The fluorinated ones (**5–8**) show a maximum absorption peak at 315 nm, and emission bands covering the range 320–450 nm (Figure ESI1, left). The maxima of the emission bands are in the range 339–382 nm, in the blue-UV region for all the compounds (Table ESI1, column 6), and the short average lifetimes support fluorescence processes. The values for compound **8** can be directly compared with those found for the identical phosphine oxide (solution:  $\lambda_{abs} = 325$  nm;  $\log \epsilon = 3.6$ ;  $\lambda_{em} = 365$  nm;  $\phi = 18\%$ ; solid:  $\lambda_{em} = 378$  nm).<sup>19</sup> While the  $\lambda_{em}$  value is almost identical for both compounds, the quantum yield  $\phi$  is only about one third for the bipyramidal fluorophosphorane. For **5–8**, **11** and **13** increasing the donor character of the R substituents at P atom, from Ph to Cy, shifts the maximum to blue (**5** vs **6**, **7** vs **8**). This blue-shift effect is also observed when reducing the fluorine substitution degree at the phosphole core (**5** vs **7**, **6** vs **8**). In addition, a marked increase in the quantum yield is observed (Table ESI1, column 6). The electron rich **15** shows the highest quantum yield (37.5 %) and a maxima emission at 382 nm (blue emission).

**Table ESI1.** Excitation and emission data in 5·10<sup>-5</sup> M THF solution.

| Comp      | $\lambda_{\text{abs}}/\text{nm}$ | $\epsilon^a/\text{M}^{-1}\text{cm}^{-1}$ | $\log \epsilon$ | $\lambda_{\text{exc}}/\text{nm}$ | $\lambda_{\text{em}}/\text{nm}$ | $\phi/\%$ | $\tau_{\text{av}}^b/\text{ns}$ | $\tau_n^c/\text{ns}; A_n^d$                                 |
|-----------|----------------------------------|------------------------------------------|-----------------|----------------------------------|---------------------------------|-----------|--------------------------------|-------------------------------------------------------------|
| <b>5</b>  | 304, 315                         | 1749                                     | 3.24            | 315                              | 339                             | 25.5      | 3.54                           | $\tau_1 = 3.54$                                             |
| <b>6</b>  | 293, 315                         | 1158                                     | 3.06            | 315                              | 351                             | 30.5      | 4.40                           | $\tau_1 = 4.40$                                             |
| <b>7</b>  | 315                              | 4305                                     | 3.63            | 315                              | 360                             | 17.6      | 2.58                           | $\tau_1 = 2.58$                                             |
| <b>8</b>  | 315                              | 3448                                     | 3.53            | 315                              | 366                             | 6.4       | 3.38                           | $\tau_1 = 1.03; A_1 = 0.88$<br>$\tau_2 = 6.23; A_2 = 0.12$  |
| <b>11</b> | 294, 321                         | 4853                                     | 3.37            | 294                              | 350                             | 6.7       | 4.97                           | $\tau_1 = 1.88, A_1 = 0.87$<br>$\tau_2 = 9.19, A_2 = 0.13$  |
| <b>13</b> | 277, 290                         | 4842                                     | 3.69            | 277                              | 366                             | 13.5      | 4.56                           | $\tau_1 = 3.94; A_1 = 0.76$<br>$\tau_2 = 22.63; A_2 = 0.24$ |
| <b>15</b> | 255, 306                         | 7248                                     | 3.86            | 306                              | 382                             | 37.5      | 7.82                           | $\tau_1 = 5.70; A_1 = 0.73$<br>$\tau_2 = 34.95; A_2 = 0.27$ |
| <b>18</b> | 289,340                          | 2616                                     | 3.42            | 289                              | 388                             | 0.02      | 6.01                           | $\tau_1 = 0.91; A_1 = 0.11$<br>$\tau_2 = 6.86; A_2 = 0.89$  |

<sup>a</sup> at  $\lambda_{\text{exc}}$ . <sup>b</sup> Average lifetime:  $\tau_{\text{av}} = (A_1\tau_1^2 + A_2\tau_2^2 + \dots) / (A_1\tau_1 + A_2\tau_2 + \dots)$ . <sup>c</sup> Natural lifetime. <sup>d</sup> Intensity coefficients.

All the quantum yields diminish in the solid state (Table ESI2, column 4). Compound **7** is the one less affected, whereas compound **8** shows a new emission maximum at 504 nm (Figure ESI1, right), which might be due to an aggregation induced emission (AIE) phenomenon, possibly due to restriction of intramolecular aryl rotation in the solid state.

**Table ESI2.** Excitation and emission data in solid state.

| Comp      | $\lambda_{\text{exc}}/\text{nm}$ | $\lambda_{\text{em}}/\text{nm}$ | $\phi/\%$ | $\tau_{\text{av}}^a/\text{ns}$ | $\tau_n^b/\text{ns}; A_n^c$                                                                |
|-----------|----------------------------------|---------------------------------|-----------|--------------------------------|--------------------------------------------------------------------------------------------|
| <b>5</b>  | 315                              | 348                             | 6.8       | 5.88                           | $\tau_1 = 2.69; A_1 = 0.73$<br>$\tau_2 = 8.58; A_2 = 0.27$                                 |
| <b>6</b>  | 315                              | 354                             | 5.6       | 9.66                           | $\tau_1 = 3.29; A_1 = 0.94$<br>$\tau_2 = 23.59; A_2 = 0.06$                                |
| <b>7</b>  | 315                              | 350                             | 12.8      | 6.80                           | $\tau_1 = 0.47; A_1 = 0.74$<br>$\tau_2 = 7.87; A_2 = 0.26$                                 |
| <b>8</b>  | 315                              | 365, 504                        | 6.5, 4.5  | 6.03                           | $\tau_1 = 0.50; A_1 = 0.79$<br>$\tau_2 = 2.49; A_2 = 0.14$<br>$\tau_3 = 10.63; A_3 = 0.07$ |
| <b>11</b> | 294                              | 350                             | 5.8       | 4.03                           | $\tau_1 = 0.44; A_1 = 0.56$<br>$\tau_2 = 4.48; A_2 = 0.44$                                 |
| <b>13</b> | 277                              | 358                             | 8.7       | 3.33                           | $\tau_1 = 3.77; A_1 = 0.92$<br>$\tau_2 = 39.85; A_2 = 0.08$                                |
| <b>15</b> | 306                              | 373                             | 10.3      | 4.74                           | $\tau_1 = 5.01; A_1 = 0.81$<br>$\tau_2 = 27.74; A_2 = 0.19$                                |

<sup>a</sup> Average lifetime:  $\tau_{\text{av}} = (A_1\tau_1^2 + A_2\tau_2^2 + \dots) / (A_1\tau_1 + A_2\tau_2 + \dots)$ . <sup>b</sup> Natural lifetime. <sup>c</sup> Intensity coefficients.

## Determination of kinetic constant and activation barrier

Dicyclohexyl(2',3',4',5',6'-pentafluoro-[1,1'-biphenyl]-2-yl)phosphine (**1**) (10.90 mg, 24.7  $\mu\text{mol}$ ) and 2,4,6,2',4',6'-hexafluorobiphenyl (1.91 mg, 7.28  $\mu\text{mol}$ ), used as internal standard, were added to a flame-dried NMR tube and set under  $\text{N}_2$  atmosphere. A coaxial tube containing  $\text{DMSO-}d_6$  was put into the NMR tube. The NMR tube was placed in a  $-20\text{ }^\circ\text{C}$  *i*-PrOH bath and 500  $\mu\text{L}$  of toluene were added. The NMR tube was shaken vigorously inside the bath until complete solution of the solids. Once the solution is homogenized, the NMR tube was set into the NMR spectrometer probe, which was already set to the measurement temperature ( $60\text{ }^\circ\text{C}$ ). The initial zero time in Table S1 corresponds to the moment when the tube is taken out of the cooling bath and placed in the probe.  $^{19}\text{F}$  NMR spectra were acquired every two minutes to follow the evolution.

In these conditions, concentrations were determined through integration of  $^{19}\text{F}$  NMR signals of species versus internal standard. The species concentrations, [Species], were obtained with the following equation:

$$[\text{Species}] = \frac{I_{\text{Species}}}{I_{\text{I.S.}}} \frac{n_F^{\text{I.S.}}}{n_F^{\text{Species}}} \frac{[\text{I.S.}]}{I.R.^{\text{Species}}}$$

where  $I_{\text{Species}}$  is the  $^{19}\text{F}$  NMR integral for a selected fluorine signal, at  $-132.3\text{ ppm}$  for the fluorophosphorane (**5**) and at  $-139.3\text{ ppm}$  for the phosphine (**1**);  $I_{\text{I.S.}}$  is the  $^{19}\text{F}$  NMR integral for 2,4,6,2',4',6'-hexafluorobiphenyl *para* fluorine signal, at  $-106.4\text{ ppm}$ ;  $n_F^{\text{Species}}$  is the number of integrated fluorine atoms for the species: 1 for the fluorophosphorane and 2 for the phosphine;  $n_F^{\text{I.S.}}$  is the number of integrated fluorine atoms for internal standard, 2; [I.S.] is the concentration of internal standard; and  $I.R.^{\text{Species}}$  is the integral relation factor between the species and internal standard in the measurement conditions.

To obtain the kinetic rate constant, the kinetic model was fitted to the measured concentration vs. time experimental data by nonlinear least-squares (NLLS) regression, using the software COPASI.<sup>20</sup> Table ESI4 collects the experimental concentration values.

From the rate constant ( $k$ ), the free activation energy ( $\Delta G^\ddagger$ ) was obtained via Eyring-Polanyi equation, where  $R$  is the ideal gases constant,  $T$  is the measurement temperature in kelvin degrees,  $k$  is the experimental rate constant,  $h$  is the Planck constant and  $k_B$  is the Boltzmann constant. Table ESI3 shows the experimental kinetic values obtained.

$$k = \frac{k_B T}{h} e^{\frac{-\Delta G^\ddagger}{RT}}$$

$$\text{Then: } \Delta G^\ddagger = -RT \ln \frac{kh}{k_B T}$$

**Table ESI3.** Experimental kinetic rate and activation energy values for the S<sub>N</sub>Ar reaction.

| [1] <sub>0</sub> (M) | T (K) | k · 10 <sup>4</sup> (s <sup>-1</sup> ) | ΔG <sup>‡</sup> <sub>333K</sub> (kcal·mol <sup>-1</sup> ) |
|----------------------|-------|----------------------------------------|-----------------------------------------------------------|
| 0.050                | 333   | 1.367                                  | 25.5                                                      |

**Table ESI4.** Concentration and time data for the S<sub>N</sub>Ar reaction kinetic study.

| Time (s) | [5] (M)    | [1] (M)    | Time (s) | [5] (M)    | [1] (M)    |
|----------|------------|------------|----------|------------|------------|
| 105      | 0.00014068 | 0.05136845 | 5505     | 0.02653517 | 0.02349420 |
| 225      | 0.00119180 | 0.05028676 | 5625     | 0.02695277 | 0.02313983 |
| 345      | 0.00199565 | 0.04940140 | 5745     | 0.02724647 | 0.02266154 |
| 465      | 0.00285470 | 0.04841607 | 5865     | 0.02785248 | 0.02220650 |
| 585      | 0.00351328 | 0.04772683 | 5985     | 0.02812661 | 0.02182314 |
| 705      | 0.00430593 | 0.04688463 | 6105     | 0.02847452 | 0.02133981 |
| 825      | 0.00504567 | 0.04600684 | 6225     | 0.02862174 | 0.02098569 |
| 945      | 0.00584979 | 0.04519062 | 6345     | 0.02895623 | 0.02065755 |
| 1065     | 0.00662967 | 0.04448041 | 6465     | 0.02943424 | 0.02030768 |
| 1185     | 0.00739047 | 0.04367266 | 6585     | 0.02974663 | 0.01990228 |
| 1305     | 0.00795917 | 0.04304342 | 6705     | 0.03014336 | 0.01968146 |
| 1425     | 0.00877574 | 0.04227787 | 6825     | 0.03038166 | 0.01943722 |
| 1545     | 0.00934637 | 0.04164698 | 6945     | 0.03070508 | 0.01892385 |
| 1665     | 0.01012055 | 0.04092458 | 7065     | 0.03114831 | 0.01875206 |
| 1785     | 0.01080822 | 0.04021375 | 7185     | 0.03137387 | 0.01840406 |
| 1905     | 0.01152135 | 0.03958713 | 7305     | 0.03144333 | 0.01804154 |
| 2025     | 0.01205201 | 0.03895512 | 7425     | 0.03186550 | 0.01771472 |
| 2145     | 0.01259616 | 0.03827406 | 7545     | 0.03212416 | 0.01737184 |
| 2265     | 0.01331173 | 0.03765380 | 7665     | 0.03242073 | 0.01717885 |
| 2385     | 0.01388585 | 0.03703204 | 7785     | 0.03264655 | 0.01698484 |
| 2505     | 0.01438152 | 0.03637587 | 7905     | 0.03298988 | 0.01656533 |
| 2625     | 0.01503310 | 0.03571825 | 8025     | 0.03326969 | 0.01628559 |
| 2745     | 0.01569647 | 0.03507391 | 8145     | 0.03353208 | 0.01601039 |
| 2865     | 0.01627767 | 0.03452241 | 8265     | 0.03357491 | 0.01577427 |
| 2985     | 0.01673067 | 0.03402051 | 8385     | 0.03406766 | 0.01543846 |
| 3105     | 0.01736840 | 0.03342250 | 8505     | 0.03405764 | 0.01508152 |
| 3225     | 0.01783945 | 0.03282471 | 8625     | 0.03433921 | 0.01494300 |
| 3345     | 0.01819511 | 0.03209138 | 8745     | 0.03465143 | 0.01470411 |
| 3465     | 0.01896464 | 0.03162421 | 8865     | 0.03483027 | 0.01437451 |
| 3585     | 0.01939923 | 0.03116370 | 8985     | 0.03504717 | 0.01424473 |
| 3705     | 0.01997181 | 0.03059344 | 9105     | 0.03525570 | 0.01394009 |
| 3825     | 0.02045989 | 0.03007389 | 9225     | 0.03561285 | 0.01367358 |
| 3945     | 0.02104059 | 0.02955283 | 9345     | 0.03561198 | 0.01341318 |
| 4065     | 0.02146972 | 0.02904828 | 9465     | 0.03589349 | 0.01317977 |
| 4185     | 0.02191988 | 0.02857468 | 9585     | 0.03617590 | 0.01311261 |
| 4305     | 0.02244524 | 0.02808362 | 9705     | 0.03611744 | 0.01272603 |
| 4425     | 0.02280011 | 0.02763354 | 9825     | 0.03631635 | 0.01253817 |
| 4545     | 0.02325734 | 0.02700490 | 9945     | 0.03687339 | 0.01233082 |

|      |            |            |       |            |            |
|------|------------|------------|-------|------------|------------|
| 4665 | 0.02366895 | 0.02652499 | 10065 | 0.03699000 | 0.01219491 |
| 4785 | 0.02406600 | 0.02608765 | 10185 | 0.03688254 | 0.01186901 |
| 4905 | 0.02455846 | 0.02569934 | 10305 | 0.03725241 | 0.01171697 |
| 5025 | 0.02492110 | 0.02511811 | 10425 | 0.03732469 | 0.01159650 |
| 5145 | 0.02545390 | 0.02471289 | 10545 | 0.03753215 | 0.01139683 |
| 5265 | 0.02575947 | 0.02441664 | 10665 | 0.03783265 | 0.01111342 |
| 5385 | 0.02623195 | 0.02390374 | 10785 | 0.03775275 | 0.01089370 |

## Computational General Section

Density Functional Theory (DFT) calculations reported in this work were carried out using the dispersion corrected hybrid functional  $\omega$ B97X-D developed by Head-Gordon and Chai,<sup>21</sup> implemented in the Gaussian16 program.<sup>22</sup> The choice of this level of theory is based on the satisfactory results obtained in previous theoretical studies on  $S_NAr$  processes.<sup>23</sup> C, H, F and P atoms were described using the double- $\zeta$  6-31+G(d,p) basis set.

Geometry optimizations were performed in toluene (SMD solvation model,  $\epsilon = 2.3741$ )<sup>24</sup> without imposing any constraint, and the nature of all the stationary points was further verified through vibrational frequency analysis.

Table ESI5 collects all the energy data that support the discussion made in the text about the thermodynamics of the reaction. The Cartesian coordinates of all the computed structures are collected below.

**Table ESI5.** DFT energy data.

| Species    | G (hartrees) | G (kcal mol <sup>-1</sup> ) | relative G (kcal mol <sup>-1</sup> ) |
|------------|--------------|-----------------------------|--------------------------------------|
| <b>1</b>   | -1770.02608  | -1110707.99                 | 0.0                                  |
| <b>TS1</b> | -1769.98381  | -1110681.46                 | 26.5                                 |
| <b>I1</b>  | -1770.01990  | -1110704.11                 | 3.9                                  |
| <b>I2</b>  | -1770.03391  | -1110712.90                 | -4.9                                 |
| <b>5</b>   | -1770.06120  | -1110730.02                 | -22.0                                |

### Cartesian coordinates of all the calculated species

#### 1 (Phosphine)

|    |             |             |             |   |             |             |             |
|----|-------------|-------------|-------------|---|-------------|-------------|-------------|
| 15 | -0.91645900 | -0.16251700 | -0.33358200 | 6 | -5.08395900 | -1.55172500 | -1.97345100 |
| 6  | -0.75164200 | 1.64835100  | 0.13731300  | 1 | -5.22116700 | 0.48210200  | -2.71780800 |
| 6  | -0.51401400 | 2.54035500  | -1.09254700 | 1 | -5.38383100 | 0.33529200  | -0.96975900 |
| 6  | -1.85133300 | 2.21977700  | 1.04128700  | 1 | -4.61928400 | -3.39472700 | -0.92612700 |
| 1  | 0.18066000  | 1.66157800  | 0.71967700  | 1 | -5.01457900 | -2.04014900 | 0.12890000  |
| 6  | -0.20133700 | 3.98079200  | -0.67308700 | 1 | -6.15889200 | -1.75202700 | -2.04904500 |
| 1  | -1.40272400 | 2.53839300  | -1.73719500 | 1 | -4.62679500 | -1.91244100 | -2.90548000 |
| 1  | 0.30861800  | 2.13371300  | -1.69252800 | 6 | -0.47956400 | -0.90145400 | 1.31133300  |
| 6  | -1.53084500 | 3.66182200  | 1.45222300  | 6 | 0.87937000  | -1.14781600 | 1.58753500  |
| 1  | -2.81282200 | 2.20768800  | 0.51076400  | 6 | -1.41023900 | -1.20212800 | 2.31277200  |
| 1  | -1.96928600 | 1.59480000  | 1.93404600  | 6 | 1.27760100  | -1.66414500 | 2.82199500  |
| 6  | -1.29824800 | 4.55297300  | 0.22904300  | 6 | 1.92657000  | -0.84539900 | 0.56641400  |
| 1  | -0.07254000 | 4.60881300  | -1.56214100 | 6 | -1.01461400 | -1.72674100 | 3.54094600  |
| 1  | 0.75535800  | 3.99614200  | -0.13193900 | 1 | -2.46702000 | -1.02552300 | 2.14063500  |
| 1  | -2.34475100 | 4.06358600  | 2.06702200  | 6 | 0.33310900  | -1.95783600 | 3.80031000  |
| 1  | -0.62808200 | 3.66391800  | 2.07878800  | 1 | 2.33271200  | -1.84029200 | 3.01046100  |
| 1  | -1.03692000 | 5.56939500  | 0.54498500  | 6 | 2.69260700  | 0.31465400  | 0.62956900  |
| 1  | -2.23326100 | 4.62974500  | -0.34440700 | 1 | -1.76232700 | -1.94959000 | 4.29624400  |
| 6  | -2.74604500 | -0.49024200 | -0.46578000 | 1 | 0.64899400  | -2.36442400 | 4.75582300  |

|   |             |             |             |   |            |             |             |
|---|-------------|-------------|-------------|---|------------|-------------|-------------|
| 6 | -3.34299200 | 0.26586200  | -1.66654600 | 6 | 3.10962400 | -1.41003400 | -1.48361900 |
| 6 | -2.99146600 | -2.00207600 | -0.62554500 | 6 | 3.63809400 | 0.63265200  | -0.33630300 |
| 1 | -3.26381900 | -0.13970100 | 0.43785400  | 6 | 3.84602000 | -0.23548400 | -1.39832800 |
| 6 | -4.83312600 | -0.04815000 | -1.84054400 | 9 | 2.51302200 | 1.18020500  | 1.63625000  |
| 1 | -2.79965000 | -0.01716600 | -2.57927700 | 9 | 4.34487200 | 1.76164600  | -0.24945500 |
| 1 | -3.21371500 | 1.34594500  | -1.54474200 | 9 | 4.75278200 | 0.05347300  | -2.33001800 |
| 6 | -4.48140100 | -2.31572200 | -0.79230800 | 9 | 3.31150200 | -2.24655300 | -2.50317000 |
| 1 | -2.44471000 | -2.35762800 | -1.51026600 | 6 | 2.16904500 | -1.70005200 | -0.50651200 |
| 1 | -2.58863300 | -2.55367900 | 0.23046400  | 9 | 1.47094200 | -2.83270500 | -0.62452400 |

# TS1

|    |             |             |             |   |             |             |             |
|----|-------------|-------------|-------------|---|-------------|-------------|-------------|
| 15 | 0.73879800  | 0.09993700  | -0.02571700 | 6 | 5.03514700  | -0.18074000 | -1.88640600 |
| 6  | 0.21133400  | -1.12690200 | 1.25110600  | 1 | 4.92385900  | -2.26541400 | -1.29104600 |
| 6  | -0.01998500 | -2.53698400 | 0.67919400  | 1 | 5.08732000  | -1.13408700 | 0.04901200  |
| 6  | 1.12213000  | -1.16111700 | 2.48758500  | 1 | 4.80370000  | 1.96218000  | -2.14134500 |
| 1  | -0.76878800 | -0.73238500 | 1.55986700  | 1 | 5.00489300  | 1.44887500  | -0.46809700 |
| 6  | -0.59321000 | -3.46109300 | 1.75857800  | 1 | 6.12698700  | -0.16914900 | -1.97688200 |
| 1  | 0.92470700  | -2.95566400 | 0.31282000  | 1 | 4.63440100  | -0.39296600 | -2.88706800 |
| 1  | -0.70079000 | -2.49576000 | -0.17622400 | 6 | 0.34232000  | 1.71558200  | 0.72265200  |
| 6  | 0.55091300  | -2.10016200 | 3.55586300  | 6 | -0.94086600 | 2.18615600  | 0.37167600  |
| 1  | 2.12059600  | -1.51415500 | 2.19519400  | 6 | 1.15709800  | 2.46095900  | 1.56698700  |
| 1  | 1.24118300  | -0.15323600 | 2.90098600  | 6 | -1.37949500 | 3.41296700  | 0.86327000  |
| 6  | 0.30650800  | -3.50412000 | 2.99637200  | 6 | -1.72520000 | 1.25116300  | -0.46798300 |
| 1  | -0.72524300 | -4.46756500 | 1.34698900  | 6 | 0.71053200  | 3.69093300  | 2.05629300  |
| 1  | -1.59124900 | -3.10190300 | 2.04523900  | 1 | 2.14454100  | 2.10016200  | 1.84230600  |
| 1  | 1.23455500  | -2.14334400 | 4.41110500  | 6 | -0.55100900 | 4.16010700  | 1.70270700  |
| 1  | -0.39651700 | -1.68587900 | 3.92651400  | 1 | -2.35782100 | 3.79009100  | 0.58616800  |
| 1  | -0.13963700 | -4.14372400 | 3.76587400  | 6 | -3.02582900 | 0.86075300  | -0.16962700 |
| 1  | 1.27042700  | -3.95845400 | 2.72634300  | 1 | 1.35128200  | 4.28045700  | 2.70445200  |
| 6  | 2.57328900  | 0.07679300  | -0.25892600 | 1 | -0.89586400 | 5.11935200  | 2.07649200  |
| 6  | 3.07881700  | -1.29955800 | -0.72075100 | 6 | -1.58872400 | -0.67042200 | -1.95146900 |
| 6  | 3.00467400  | 1.18030300  | -1.24170200 | 6 | -3.62816100 | -0.24950200 | -0.73733100 |
| 1  | 3.00889600  | 0.29344300  | 0.72884100  | 6 | -2.87735000 | -1.02425100 | -1.62088000 |
| 6  | 4.59801500  | -1.28619000 | -0.92344200 | 9 | -3.73720000 | 1.56020000  | 0.73425500  |
| 1  | 2.58156400  | -1.57054000 | -1.66197700 | 9 | -4.90731500 | -0.57165100 | -0.46603200 |
| 1  | 2.81917500  | -2.06867900 | 0.01286000  | 9 | -3.42837000 | -2.11215600 | -2.17132200 |
| 6  | 4.52530900  | 1.18495400  | -1.42134500 | 9 | -0.86190000 | -1.47286700 | -2.75903000 |
| 1  | 2.52470500  | 1.00264600  | -2.21161600 | 6 | -0.94645100 | 0.44900900  | -1.36790700 |
| 1  | 2.66198600  | 2.16023200  | -0.89435200 | 9 | -0.13295600 | 1.16587000  | -2.28940200 |

# I1

|    |             |             |             |   |             |             |            |
|----|-------------|-------------|-------------|---|-------------|-------------|------------|
| 15 | -0.71046900 | 0.40533000  | 0.05420700  | 6 | -1.38535300 | -2.50125500 | 3.63942500 |
| 6  | -1.95008200 | 0.60671800  | -1.28580400 | 1 | -2.66964200 | -3.57036100 | 2.25720200 |
| 6  | -2.01019100 | -0.56116600 | -2.28500300 | 1 | -3.30482500 | -2.00467000 | 2.76674100 |
| 6  | -3.33656700 | 0.92195200  | -0.69154800 | 1 | -0.16690200 | -1.06873300 | 4.71662300 |
| 1  | -1.58584900 | 1.49545200  | -1.82058500 | 1 | -1.77011400 | -0.47124700 | 4.28542000 |

|   |             |             |             |   |             |             |             |
|---|-------------|-------------|-------------|---|-------------|-------------|-------------|
| 6 | -3.03635400 | -0.26220800 | -3.38308800 | 1 | -1.83455500 | -2.93812300 | 4.53874500  |
| 1 | -2.28527800 | -1.48666300 | -1.76760800 | 1 | -0.51363800 | -3.10973000 | 3.37224900  |
| 1 | -1.02683400 | -0.72349700 | -2.73420500 | 6 | -0.06910900 | 2.02339200  | 0.51451200  |
| 6 | -4.34587500 | 1.20906100  | -1.80741600 | 6 | 1.31644600  | 2.08356800  | 0.27940400  |
| 1 | -3.68484500 | 0.06143100  | -0.10672600 | 6 | -0.76658600 | 3.09863200  | 1.04950200  |
| 1 | -3.28205400 | 1.77817900  | -0.00933700 | 6 | 2.00487100  | 3.25717500  | 0.58382000  |
| 6 | -4.41722200 | 0.04996400  | -2.80336400 | 6 | 1.86405800  | 0.82730800  | -0.27741600 |
| 1 | -3.09086400 | -1.11847600 | -4.06307900 | 6 | -0.06886600 | 4.26850500  | 1.34833300  |
| 1 | -2.68940900 | 0.59398300  | -3.97790500 | 1 | -1.83287400 | 3.03334600  | 1.24159700  |
| 1 | -5.32945900 | 1.39562300  | -1.36368700 | 6 | 1.30350200  | 4.34007700  | 1.11414800  |
| 1 | -4.05314900 | 2.12761000  | -2.33376700 | 1 | 3.07205000  | 3.33268700  | 0.41688900  |
| 1 | -5.11942100 | 0.28872200  | -3.60903500 | 6 | 3.18258900  | 0.53061900  | -0.56333000 |
| 1 | -4.80783500 | -0.84191900 | -2.29450900 | 1 | -0.59468900 | 5.11962600  | 1.76814300  |
| 6 | -1.35193600 | -0.45806900 | 1.52651600  | 1 | 1.84127100  | 5.25235100  | 1.35217200  |
| 6 | -1.79038600 | -1.90120000 | 1.21965700  | 6 | 1.24043200  | -1.41701200 | -0.98968800 |
| 6 | -0.32180800 | -0.42034500 | 2.67109500  | 6 | 3.53398700  | -0.72087100 | -1.07075700 |
| 1 | -2.23189400 | 0.14656300  | 1.80122300  | 6 | 2.57211100  | -1.68748900 | -1.29734100 |
| 6 | -2.38475900 | -2.53678100 | 2.48098200  | 9 | 4.16659200  | 1.42282400  | -0.37103000 |
| 1 | -0.89779000 | -2.46443700 | 0.92011300  | 9 | 4.80899100  | -0.98078500 | -1.34854700 |
| 1 | -2.52429300 | -1.92367500 | 0.40639700  | 9 | 2.92181500  | -2.86996000 | -1.79131900 |
| 6 | -0.92111400 | -1.07065500 | 3.92257900  | 9 | 0.32409800  | -2.33066700 | -1.28590000 |
| 1 | 0.55522200  | -0.99988300 | 2.34512100  | 6 | 0.88993800  | -0.16867100 | -0.51572200 |
| 1 | -0.02374300 | 0.61098900  | 2.89098600  | 9 | 1.33384700  | -2.53725800 | 1.23132200  |

## I2

|    |             |             |             |   |             |             |             |
|----|-------------|-------------|-------------|---|-------------|-------------|-------------|
| 15 | 0.57050200  | 0.14991400  | -0.36110900 | 6 | 4.62945300  | -1.45143300 | -2.17430800 |
| 6  | 0.72313800  | 0.36854300  | 1.53425400  | 1 | 3.70271100  | -3.40855900 | -2.03549400 |
| 6  | 0.79747700  | -0.95171400 | 2.32120000  | 1 | 4.09119200  | -2.67895800 | -0.48038800 |
| 6  | 1.87531500  | 1.30358600  | 1.94597300  | 1 | 5.22622500  | 0.62740500  | -1.98076600 |
| 1  | -0.21290200 | 0.86651500  | 1.82797200  | 1 | 5.02895500  | -0.21853700 | -0.44800500 |
| 6  | 0.82126200  | -0.70422600 | 3.83458200  | 1 | 5.65469200  | -1.83663800 | -2.21206000 |
| 1  | 1.69949200  | -1.51332900 | 2.04115500  | 1 | 4.30094800  | -1.31305600 | -3.21336200 |
| 1  | -0.05553600 | -1.59375900 | 2.08093800  | 6 | -0.06013600 | 1.83322300  | -0.65599900 |
| 6  | 1.88484100  | 1.54980700  | 3.45908100  | 6 | -1.46951700 | 1.81604000  | -0.59889400 |
| 1  | 2.84137200  | 0.86431200  | 1.66160400  | 6 | 0.62666100  | 3.01693400  | -0.88367800 |
| 1  | 1.79533900  | 2.26320900  | 1.42433000  | 6 | -2.17412900 | 3.01186500  | -0.75308300 |
| 6  | 1.95948700  | 0.23494000  | 4.23713800  | 6 | -2.05060300 | 0.46962300  | -0.39285500 |
| 1  | 0.90964300  | -1.66040400 | 4.36291300  | 6 | -0.08875900 | 4.20371900  | -1.04732500 |
| 1  | -0.13723700 | -0.26112800 | 4.13883400  | 1 | 1.70906000  | 3.02761200  | -0.94901500 |
| 1  | 2.72841500  | 2.19816500  | 3.72278900  | 6 | -1.47909100 | 4.19900600  | -0.97586100 |
| 1  | 0.96962300  | 2.08841800  | 3.74113800  | 1 | -3.25583800 | 3.02505200  | -0.71012800 |
| 1  | 1.92900300  | 0.42823400  | 5.31540900  | 6 | -3.39706300 | 0.13476300  | -0.32216000 |
| 1  | 2.92243400  | -0.25343900 | 4.02964100  | 1 | 0.44398300  | 5.13108800  | -1.23324000 |
| 6  | 2.25987000  | -0.58380100 | -0.64416000 | 1 | -2.03176100 | 5.12468500  | -1.10141700 |
| 6  | 2.27251300  | -1.92933800 | -1.38627600 | 6 | -1.51105300 | -1.87796800 | -0.13034200 |
| 6  | 3.17482000  | 0.44733000  | -1.33354000 | 6 | -3.80450700 | -1.18612600 | -0.16508900 |

|   |            |             |             |   |             |             |             |
|---|------------|-------------|-------------|---|-------------|-------------|-------------|
| 1 | 2.66094300 | -0.75735600 | 0.35890100  | 6 | -2.86347500 | -2.19873900 | -0.07176600 |
| 6 | 3.70659800 | -2.46021700 | -1.48690300 | 9 | -4.36163100 | 1.06346900  | -0.40736500 |
| 1 | 1.85278700 | -1.79345800 | -2.38603200 | 9 | -5.10405000 | -1.48177600 | -0.10664800 |
| 1 | 1.64313200 | -2.65610400 | -0.86513500 | 9 | -3.25672300 | -3.46468100 | 0.07333900  |
| 6 | 4.60082500 | -0.10190800 | -1.45383400 | 9 | -0.62422500 | -2.88129500 | -0.03504500 |
| 1 | 2.77476600 | 0.67754400  | -2.32657000 | 6 | -1.10500500 | -0.57287200 | -0.28223700 |
| 1 | 3.19843600 | 1.38151200  | -0.76039700 | 9 | 0.35541400  | -0.06171200 | -2.19433600 |

#### 5 (Fluorophosphorane)

|    |             |             |             |   |             |             |             |
|----|-------------|-------------|-------------|---|-------------|-------------|-------------|
| 15 | 0.91783300  | -0.17011400 | 0.58717600  | 6 | 1.61768000  | 4.52406600  | 0.85977100  |
| 6  | 1.63623600  | -1.09663800 | -0.87115700 | 1 | 3.56376500  | 4.02491400  | 0.03878900  |
| 6  | 3.16208300  | -1.23478600 | -0.95315800 | 1 | 3.29949500  | 3.45252700  | 1.68372700  |
| 6  | 0.97186400  | -2.48764100 | -0.94343000 | 1 | -0.34131400 | 4.55698000  | 1.79390300  |
| 1  | 1.31026000  | -0.52599700 | -1.74659700 | 1 | 0.90275100  | 3.75367400  | 2.74940600  |
| 6  | 3.55388000  | -1.94044300 | -2.25731500 | 1 | 1.94049500  | 5.47822600  | 1.29123300  |
| 1  | 3.52765600  | -1.81041900 | -0.09832100 | 1 | 1.20263900  | 4.74793200  | -0.13292900 |
| 1  | 3.64130800  | -0.25340600 | -0.90545000 | 6 | -0.13235800 | -1.06183300 | 1.80101800  |
| 6  | 1.37506500  | -3.21330300 | -2.23113900 | 6 | -1.50686400 | -1.07089800 | 1.50783600  |
| 1  | 1.28599900  | -3.07822100 | -0.07288700 | 6 | 0.33733500  | -1.68494600 | 2.95555800  |
| 1  | -0.11929000 | -2.40478000 | -0.89880000 | 6 | -2.40142300 | -1.70391200 | 2.37299400  |
| 6  | 2.89538100  | -3.31734000 | -2.36911700 | 6 | -1.84426400 | -0.37217100 | 0.25174500  |
| 1  | 4.64448600  | -2.03632900 | -2.30502900 | 6 | -0.55921000 | -2.31664000 | 3.81648500  |
| 1  | 3.25304400  | -1.32159900 | -3.11458700 | 1 | 1.39734000  | -1.67585900 | 3.17335300  |
| 1  | 0.92037100  | -4.21024700 | -2.24602300 | 6 | -1.92071800 | -2.32398100 | 3.52432800  |
| 1  | 0.96751500  | -2.66523300 | -3.09213300 | 1 | -3.46243000 | -1.71690600 | 2.15813800  |
| 1  | 3.15696900  | -3.78956700 | -3.32287000 | 6 | -0.72032900 | 0.17514000  | -0.38421100 |
| 1  | 3.28551400  | -3.96773700 | -1.57389800 | 6 | -3.10171900 | -0.22686100 | -0.32132700 |
| 6  | 1.29621400  | 1.59753400  | 1.04897800  | 1 | -0.19119500 | -2.80297700 | 4.71446100  |
| 6  | 2.40248300  | 2.20701000  | 0.17087600  | 1 | -2.61803900 | -2.81568300 | 4.19579000  |
| 6  | 0.08885200  | 2.53793700  | 1.15440000  | 6 | -0.89944900 | 0.84941500  | -1.57315800 |
| 1  | 1.70793600  | 1.47189200  | 2.05618200  | 6 | -3.26024900 | 0.45520500  | -1.52167900 |
| 6  | 2.81514400  | 3.58363300  | 0.70632600  | 6 | -2.15346500 | 0.99852300  | -2.15508400 |
| 1  | 2.04487200  | 2.30569200  | -0.86143800 | 9 | 2.35600600  | -0.61602200 | 1.53420100  |
| 1  | 3.27488500  | 1.54846100  | 0.15722800  | 9 | -4.20983600 | -0.73301300 | 0.24680700  |
| 6  | 0.52618100  | 3.89111300  | 1.72644900  | 9 | -4.47200400 | 0.58910000  | -2.06619800 |
| 1  | -0.35238800 | 2.71040800  | 0.16701000  | 9 | -2.30329500 | 1.66031600  | -3.30571200 |
| 1  | -0.69041600 | 2.09329700  | 1.78404300  | 9 | 0.14137100  | 1.41890500  | -2.21974900 |

## X-ray Crystallography Data

A crystal was attached to a glass fiber and transferred to an Agilent Supernova diffractometer with an Atlas CCD area detector (Valladolid University facilities). The crystal was kept at constant temperature during data collection. Data collection was performed with Mo-K $\alpha$  radiation ( $\lambda = 0.71073 \text{ \AA}$ ). Data integration, scaling and empirical absorption correction were carried out using the CrysAlisPro program package.<sup>25</sup> Using Olex2,<sup>26</sup> the structure was solved with the olex2.solve<sup>27</sup> structure solution program and

refined with ShelX program.<sup>28</sup> The non-hydrogen atoms were refined anisotropically and hydrogen atoms were placed at idealized positions and refined using the riding model. Refinement proceeded smoothly to give the residuals shown in Tables ESI6. CCDC contains the supporting crystallographic data for this paper. These data can be obtained free of charge at [www.ccdc.cam.ac.uk/conts/retrieving.html](http://www.ccdc.cam.ac.uk/conts/retrieving.html) [or from the Cambridge Crystallographic Data Centre, 12, Union Road, Cambridge CB2 1EZ, UK; fax: (internat.) +44-1223/336-033; E-mail: [deposit@ccdc.cam.ac.uk](mailto:deposit@ccdc.cam.ac.uk)].

**Table ESI6.** Crystal data and structure refinements for complexes **6**, **7**, **11**.

| Identification code                         | <b>6</b>                                                         | <b>7</b>                                                         | <b>11</b>                                                        |
|---------------------------------------------|------------------------------------------------------------------|------------------------------------------------------------------|------------------------------------------------------------------|
| CCDC deposition N°                          | 2058334                                                          | 2058335                                                          | 2058336                                                          |
| Empirical formula                           | C <sub>24</sub> H <sub>14</sub> F <sub>5</sub> P                 | C <sub>24</sub> H <sub>22</sub> F <sub>9</sub> P                 | C <sub>24</sub> H <sub>30</sub> FP                               |
| Formula weight                              | 428.32                                                           | 512.38                                                           | 368.45                                                           |
| Temperature/K                               | 297.5(7)                                                         | 219.9(4)                                                         | 294                                                              |
| Crystal system                              | orthorhombic                                                     | orthorhombic                                                     | monoclinic                                                       |
| Space group                                 | P2 <sub>1</sub> 2 <sub>1</sub> 2 <sub>1</sub>                    | Pbca                                                             | P2 <sub>1</sub> /n                                               |
| a/Å                                         | 9.4654(5)                                                        | 8.5949(5)                                                        | 9.4899(4)                                                        |
| b/Å                                         | 11.0784(6)                                                       | 17.1989(10)                                                      | 11.6773(4)                                                       |
| c/Å                                         | 18.2148(10)                                                      | 29.961(2)                                                        | 18.4024(6)                                                       |
| α/°                                         | 90                                                               | 90                                                               | 90                                                               |
| β/°                                         | 90                                                               | 90                                                               | 102.701(4)                                                       |
| γ/°                                         | 90                                                               | 90                                                               | 90                                                               |
| Volume/Å <sup>3</sup>                       | 1910.03(18)                                                      | 4428.9(5)                                                        | 1989.39(13)                                                      |
| Z                                           | 4                                                                | 8                                                                | 4                                                                |
| ρ <sub>calc</sub> /cm <sup>3</sup>          | 1.489                                                            | 1.537                                                            | 1.23                                                             |
| μ/mm <sup>-1</sup>                          | 0.199                                                            | 0.21                                                             | 0.152                                                            |
| F(000)                                      | 872                                                              | 2096                                                             | 792                                                              |
| Crystal size/mm <sup>3</sup>                | 0.323 × 0.159 × 0.132                                            | 0.356 × 0.247 × 0.066                                            | 0.426 × 0.301 × 0.157                                            |
| Radiation                                   | Mo Kα (λ = 0.71073)                                              | MoKα (λ = 0.71073)                                               | Mo Kα (λ = 0.71073)                                              |
| 2θ range for data collection/°              | 7.216 to 59.318                                                  | 6.688 to 59.428                                                  | 6.978 to 59.19                                                   |
| Index ranges                                | -9 ≤ h ≤ 12,<br>-11 ≤ k ≤ 14,<br>-25 ≤ l ≤ 25                    | -10 ≤ h ≤ 11,<br>-22 ≤ k ≤ 23,<br>-25 ≤ l ≤ 39                   | -12 ≤ h ≤ 13,<br>-13 ≤ k ≤ 15,<br>-18 ≤ l ≤ 25                   |
| Reflections collected                       | 7141                                                             | 12364                                                            | 8723                                                             |
| Independent reflections                     | 4039 [R <sub>int</sub> = 0.0275,<br>R <sub>sigma</sub> = 0.0491] | 5253 [R <sub>int</sub> = 0.0410,<br>R <sub>sigma</sub> = 0.0588] | 4641 [R <sub>int</sub> = 0.0275,<br>R <sub>sigma</sub> = 0.0538] |
| Data/restraints/parameters                  | 4039/0/271                                                       | 5253/0/325                                                       | 4641/0/235                                                       |
| Goodness-of-fit on F <sup>2</sup>           | 1.058                                                            | 1.041                                                            | 1.046                                                            |
| Final R indexes [I ≥ 2σ (I)]                | R <sub>1</sub> = 0.0442, wR <sub>2</sub> =<br>0.0825             | R <sub>1</sub> = 0.0710, wR <sub>2</sub> =<br>0.1862             | R <sub>1</sub> = 0.0561, wR <sub>2</sub> =<br>0.1174             |
| Final R indexes [all data]                  | R <sub>1</sub> = 0.0703, wR <sub>2</sub> =<br>0.0985             | R <sub>1</sub> = 0.1505, wR <sub>2</sub> =<br>0.2309             | R <sub>1</sub> = 0.0993, wR <sub>2</sub> =<br>0.1469             |
| Largest diff. peak/hole / e Å <sup>-3</sup> | 0.24/-0.21                                                       | 0.32/-0.35                                                       | 0.31/-0.30                                                       |

# NMR Spectra

## $^1\text{H}$ NMR Spectra of $\text{FPCy}_2\text{C}_6\text{H}_4\text{C}_6\text{F}_4$ (**5**) in $\text{CDCl}_3$ .

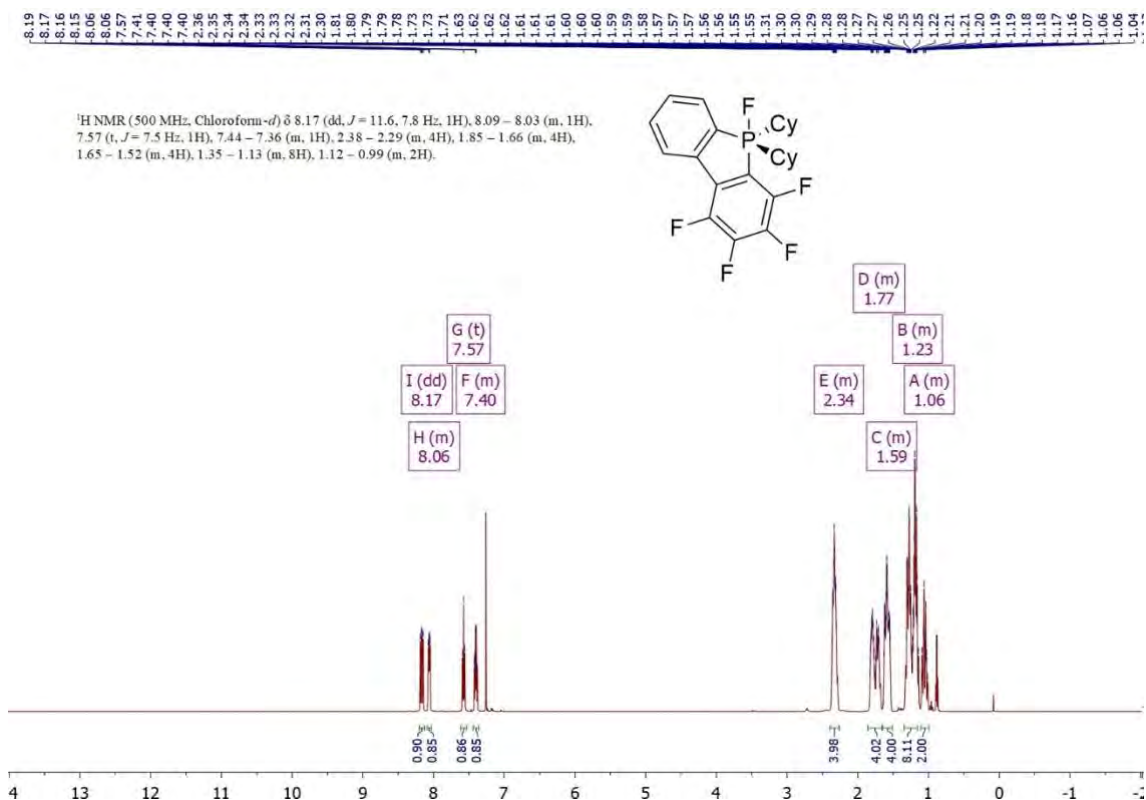

## $^{19}\text{F}$ NMR Spectra of $\text{FPCy}_2\text{C}_6\text{H}_4\text{C}_6\text{F}_4$ (**5**) in $\text{CDCl}_3$ .

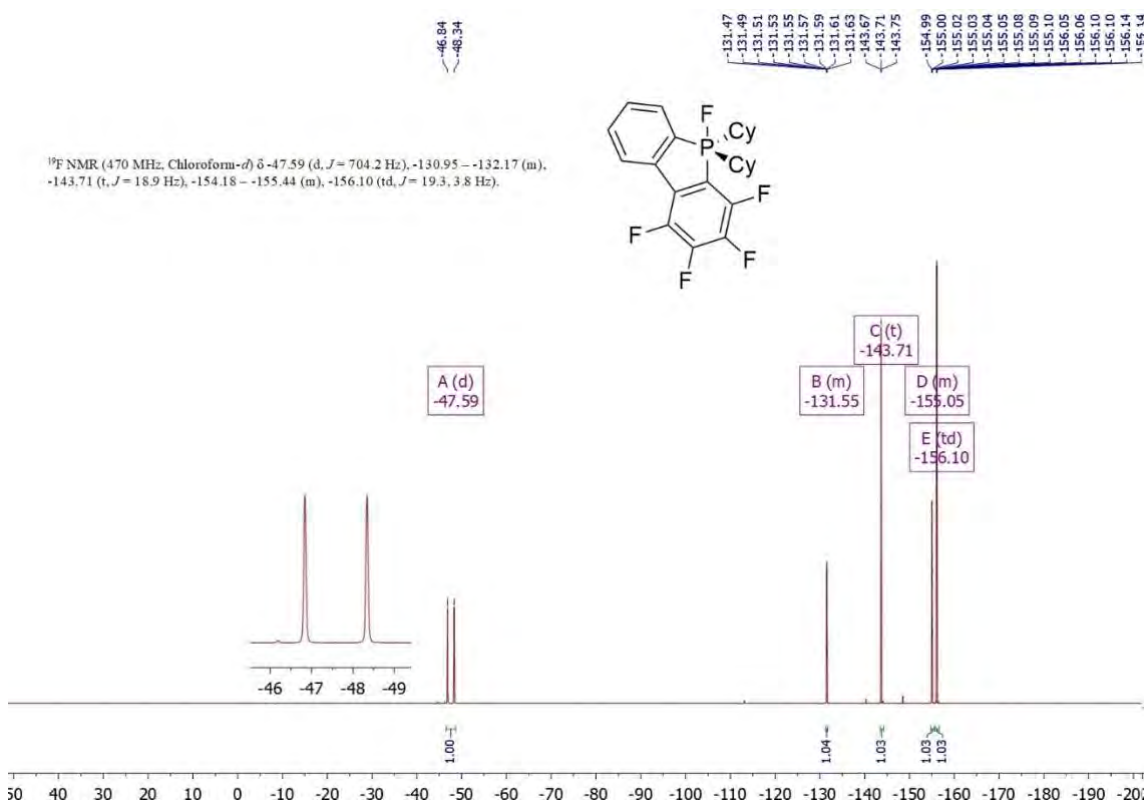

$^{31}\text{P}\{^1\text{H}\}$  NMR Spectra of  $\text{FPCy}_2\text{C}_6\text{H}_4\text{C}_6\text{F}_4$  (**5**) in  $\text{CDCl}_3$ .

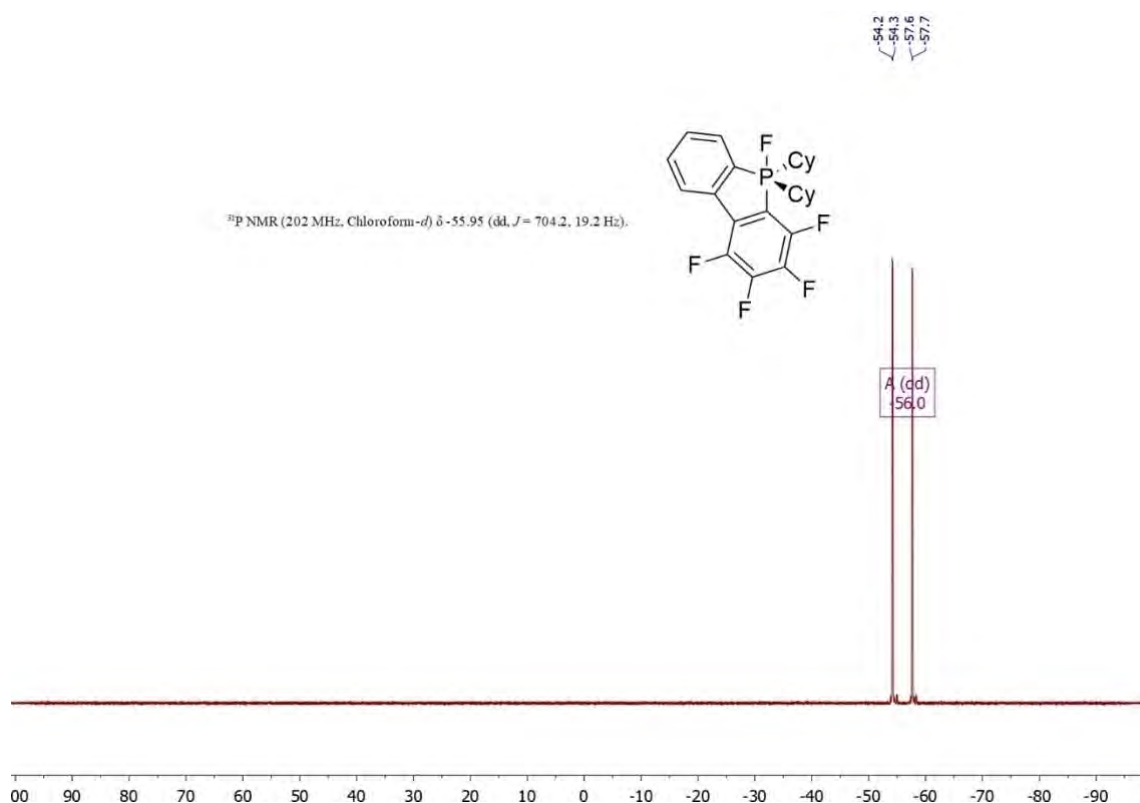

$^{13}\text{C}\{^1\text{H}\}$  NMR Spectra of  $\text{FPCy}_2\text{C}_6\text{H}_4\text{C}_6\text{F}_4$  (**5**) in  $\text{CDCl}_3$ .

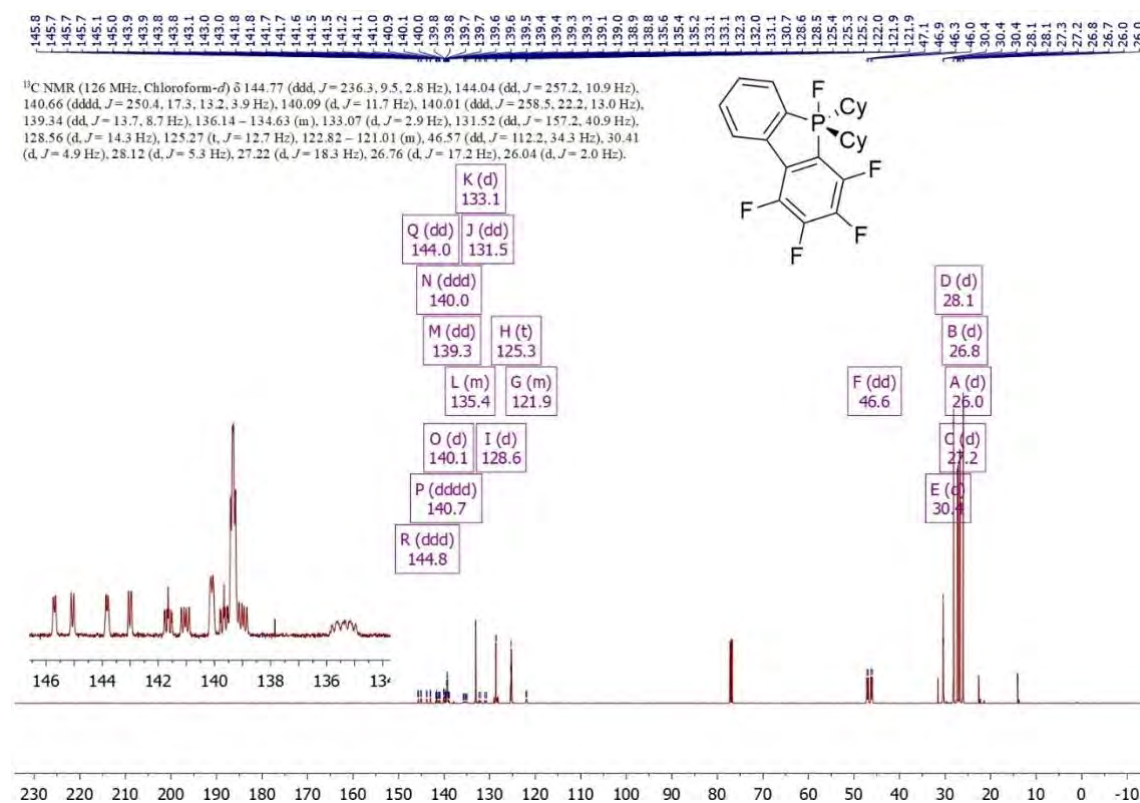

# <sup>1</sup>H NMR Spectra of FPPh<sub>2</sub>C<sub>6</sub>H<sub>4</sub>C<sub>6</sub>F<sub>4</sub> (**6**) in CDCl<sub>3</sub>.

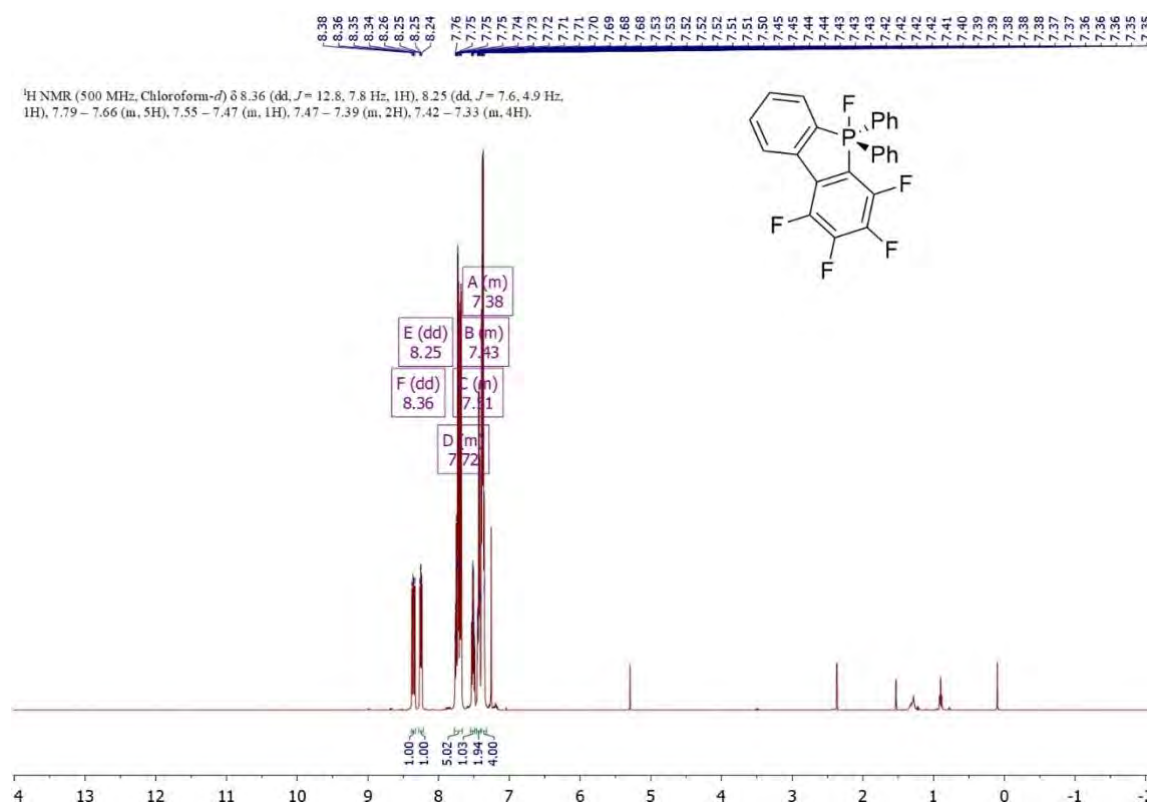

# <sup>19</sup>F NMR Spectra of FPPh<sub>2</sub>C<sub>6</sub>H<sub>4</sub>C<sub>6</sub>F<sub>4</sub> (**6**) in CDCl<sub>3</sub>.

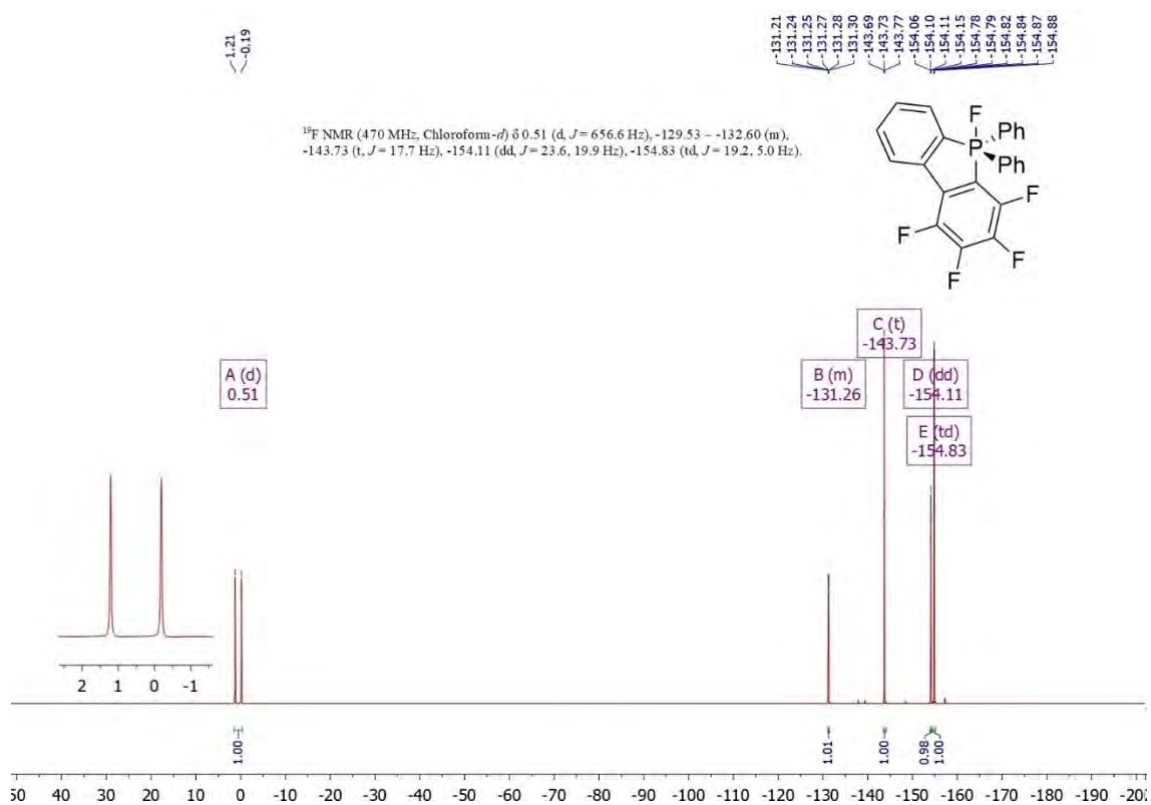

$^{31}\text{P}\{^1\text{H}\}$  NMR Spectra of  $\text{FPPh}_2\text{C}_6\text{H}_4\text{C}_6\text{F}_4$  (**6**) in  $\text{CDCl}_3$ .

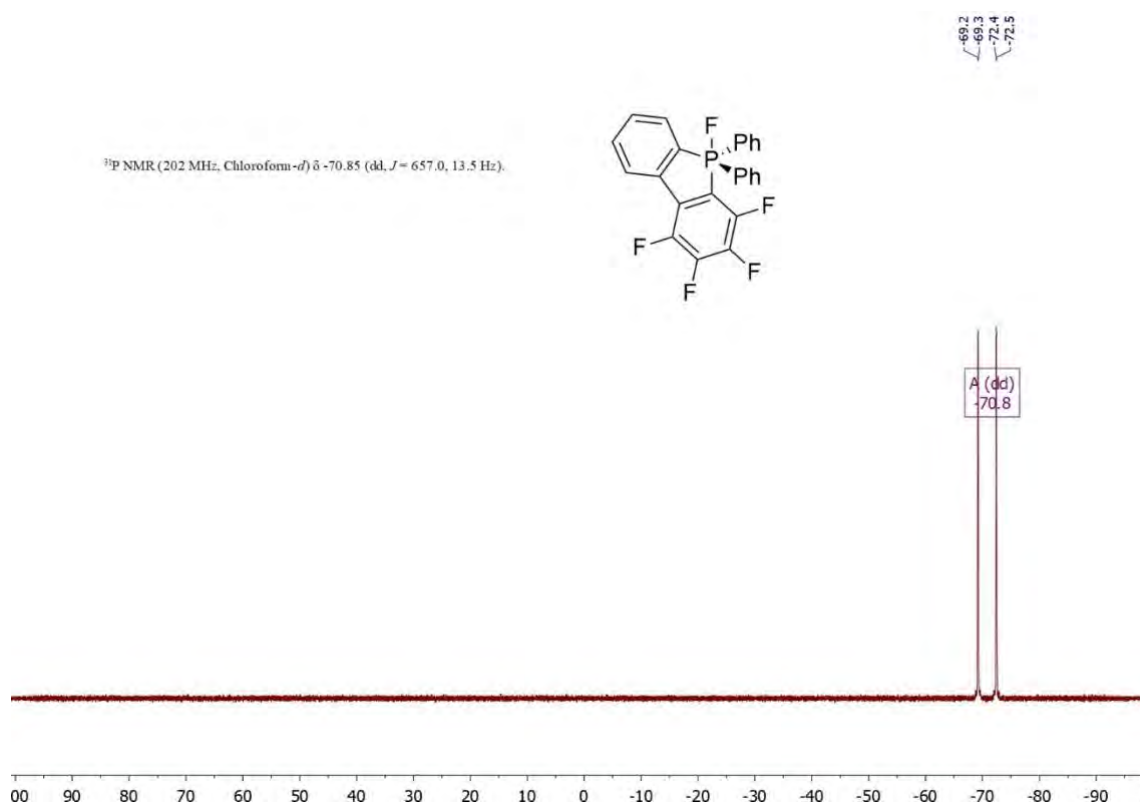

$^{13}\text{C}\{^1\text{H}\}$  NMR Spectra of  $\text{FPPh}_2\text{C}_6\text{H}_4\text{C}_6\text{F}_4$  (**6**) in  $\text{CDCl}_3$ .

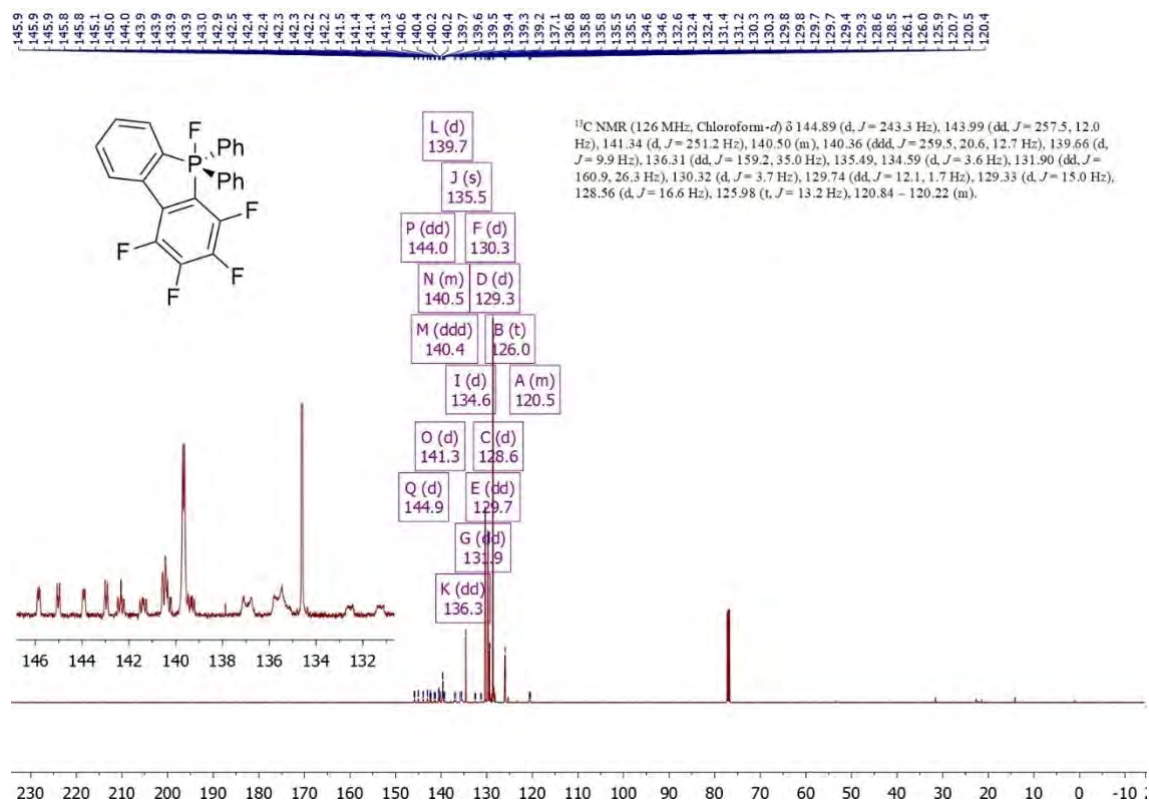

# <sup>1</sup>H NMR Spectra of FPCy<sub>2</sub>C<sub>6</sub>F<sub>4</sub>C<sub>6</sub>F<sub>4</sub> (**7**) in CDCl<sub>3</sub>.

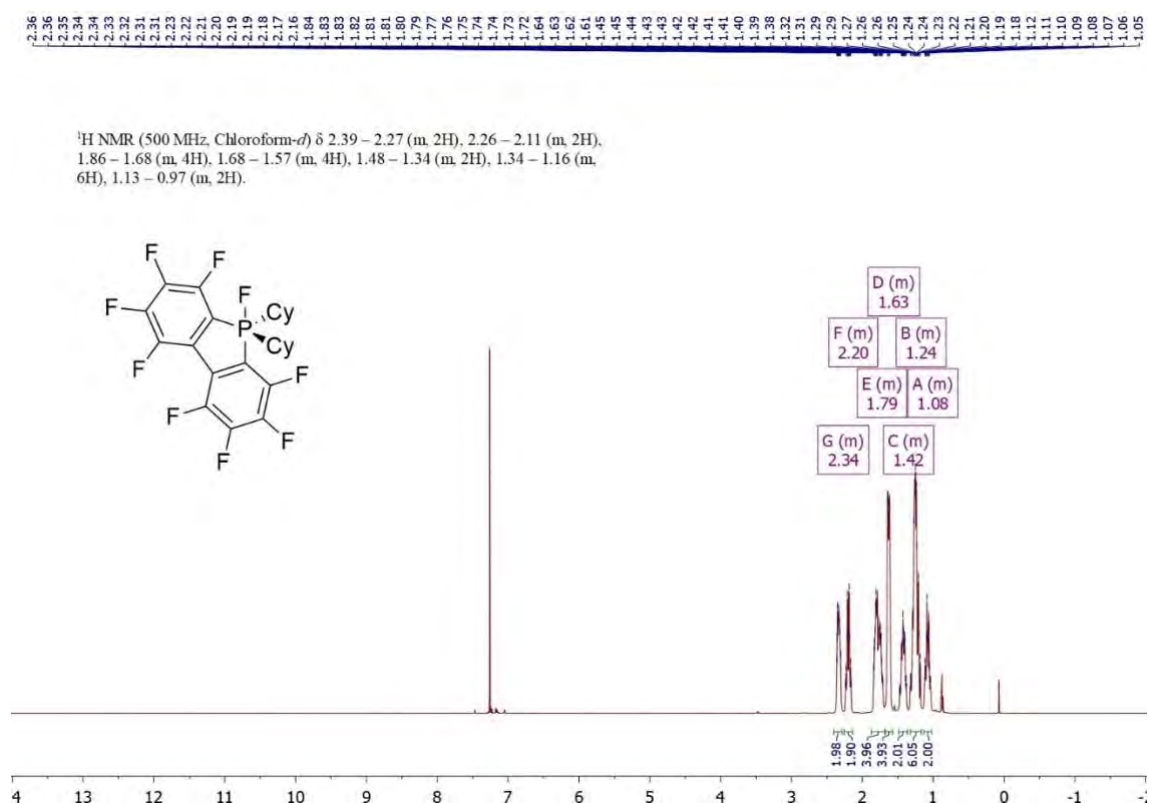

# <sup>19</sup>F NMR Spectra of FPCy<sub>2</sub>C<sub>6</sub>F<sub>4</sub>C<sub>6</sub>F<sub>4</sub> (**7**) in CDCl<sub>3</sub>.

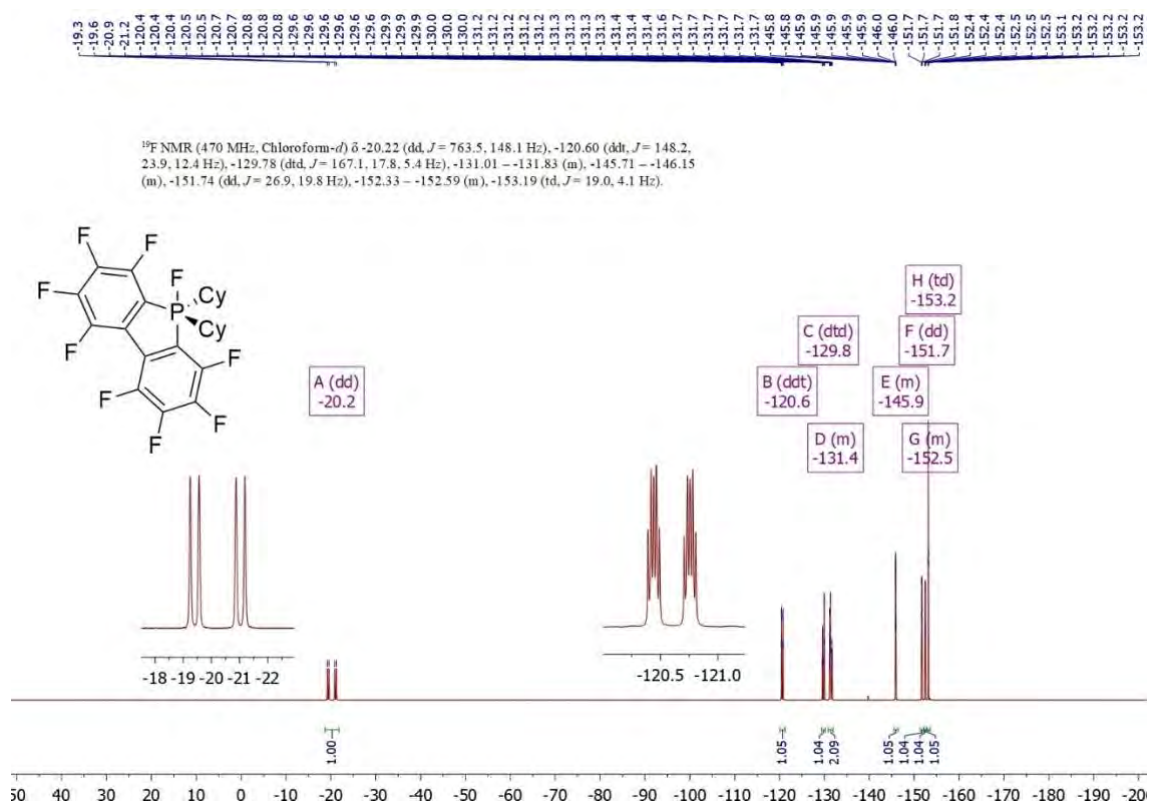

$^{31}\text{P}\{^1\text{H}\}$  NMR Spectra of  $\text{FPCy}_2\text{C}_6\text{F}_4\text{C}_6\text{F}_4$  (**7**) in  $\text{CDCl}_3$ .

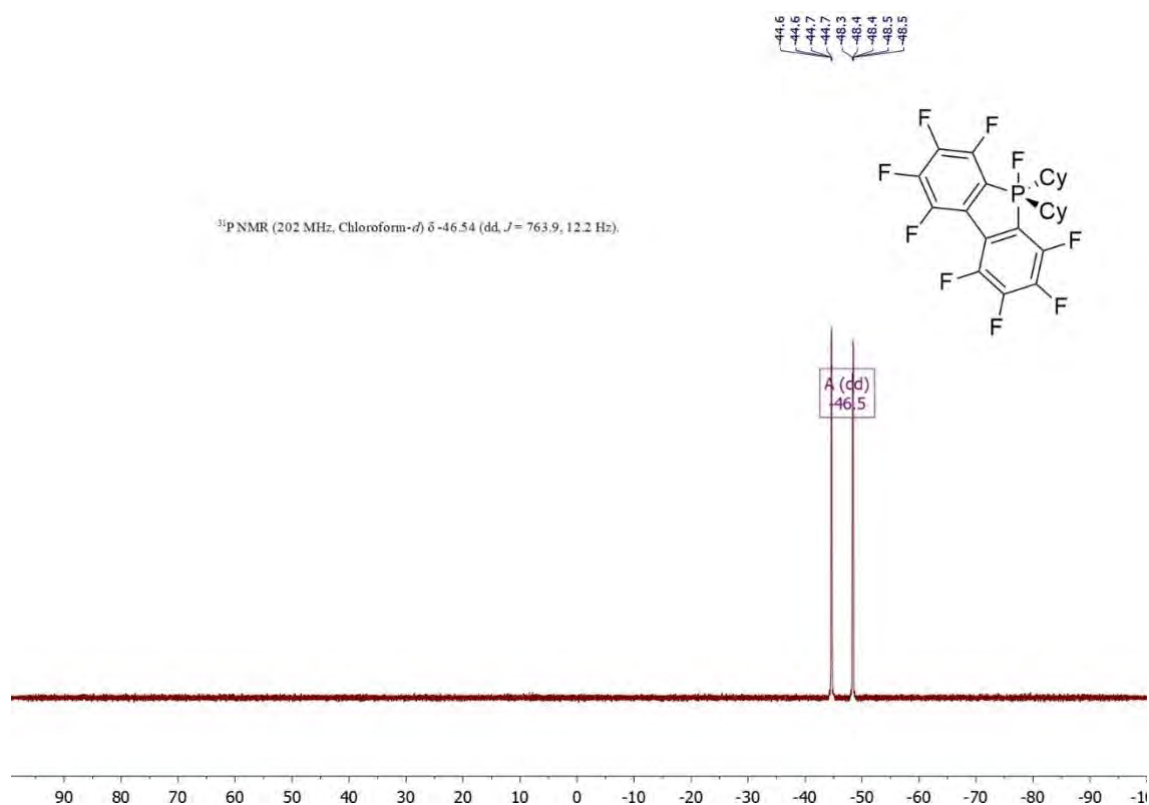

$^{13}\text{C}\{^1\text{H}\}$  NMR Spectra of  $\text{FPCy}_2\text{C}_6\text{F}_4\text{C}_6\text{F}_4$  (**7**) in  $\text{CDCl}_3$ . \* Residual toluene signals.

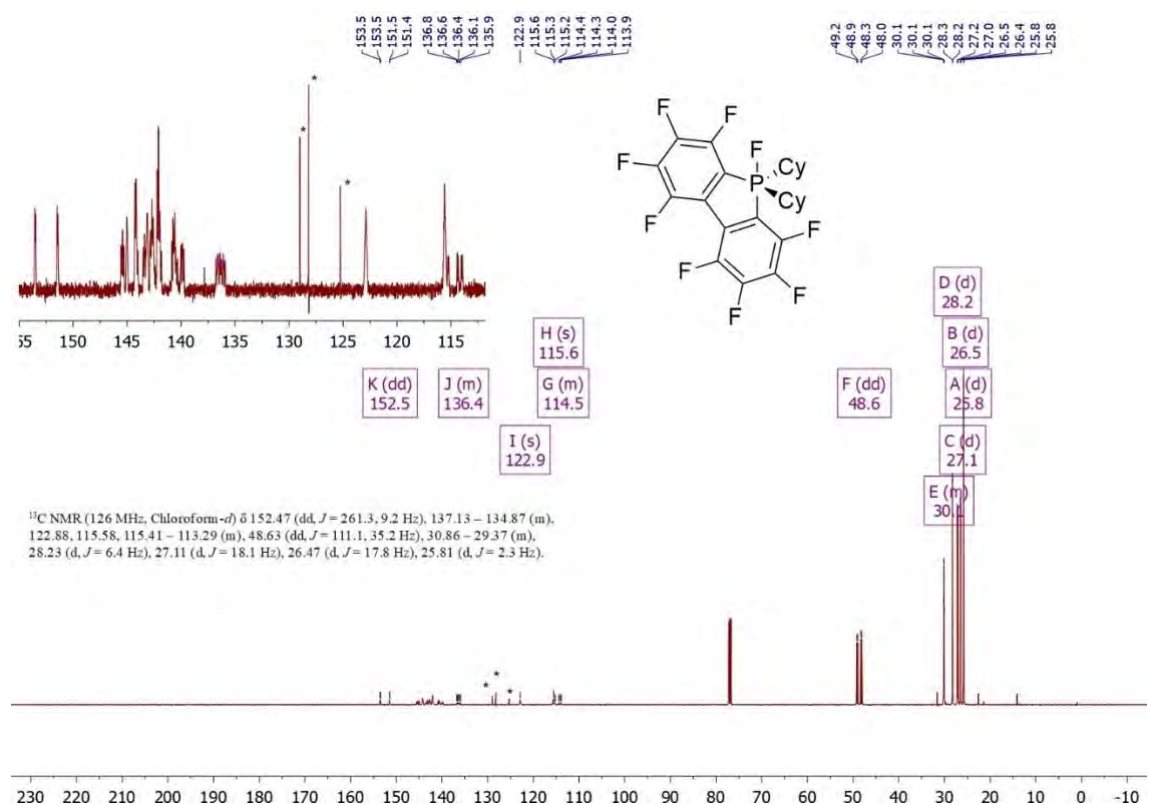

# <sup>13</sup>C-<sup>19</sup>F HSQC NMR Spectra of FPCy<sub>2</sub>C<sub>6</sub>F<sub>4</sub>C<sub>6</sub>F<sub>4</sub> (**7**) in CDCl<sub>3</sub>.

<sup>13</sup>C NMR (126 MHz, cdcl<sub>3</sub>) δ 152.47, 143.19, 144.07, 144.38, 140.93, 141.58, 141.72

<sup>19</sup>F NMR (470 MHz, cdcl<sub>3</sub>) δ -120.52, -129.96, -131.40, -146.05, -151.91, -152.62, -153.14.

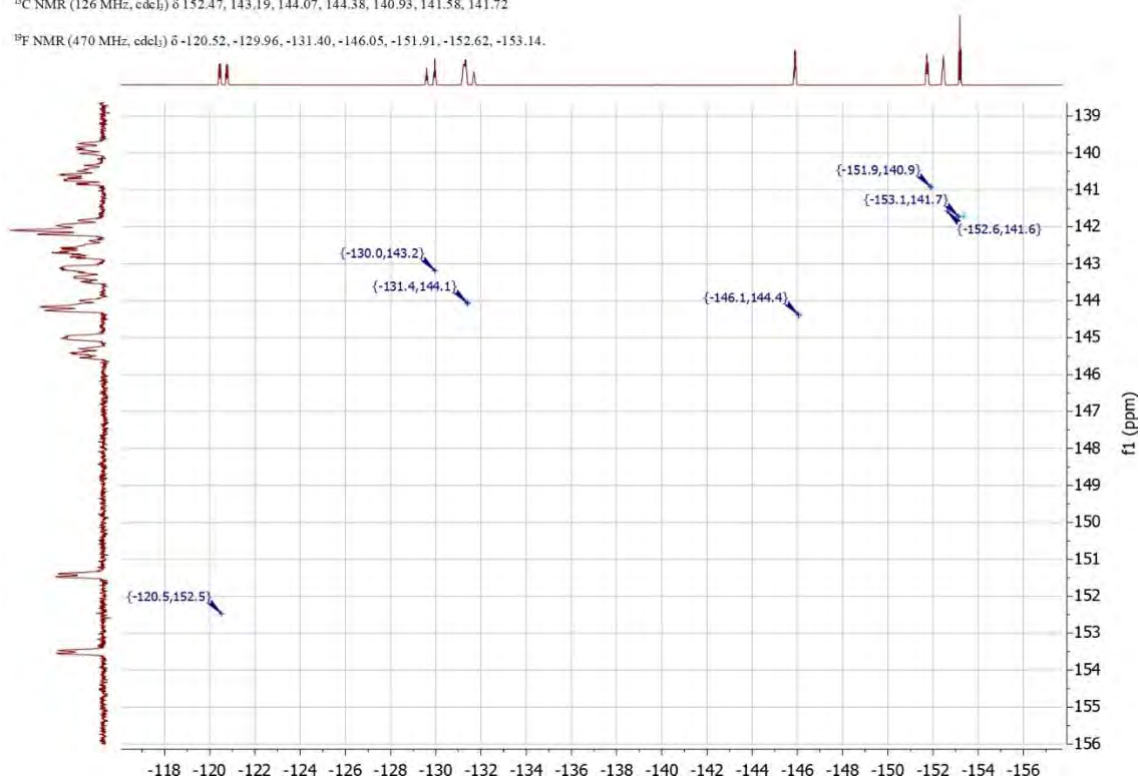

# <sup>13</sup>C-<sup>19</sup>F HMBC NMR Spectra of FPCy<sub>2</sub>C<sub>6</sub>F<sub>4</sub>C<sub>6</sub>F<sub>4</sub> (**7**) in CDCl<sub>3</sub>.

<sup>13</sup>C NMR (126 MHz, cdcl<sub>3</sub>) δ 142.34, 136.28, 140.96, 141.57, 143.10, 144.40, 152.48, 140.92, 143.19

<sup>19</sup>F NMR (470 MHz, cdcl<sub>3</sub>) δ -129.64, -131.28, -131.28, -145.90, -145.92, -152.48, -152.48, -153.21, -153.21.

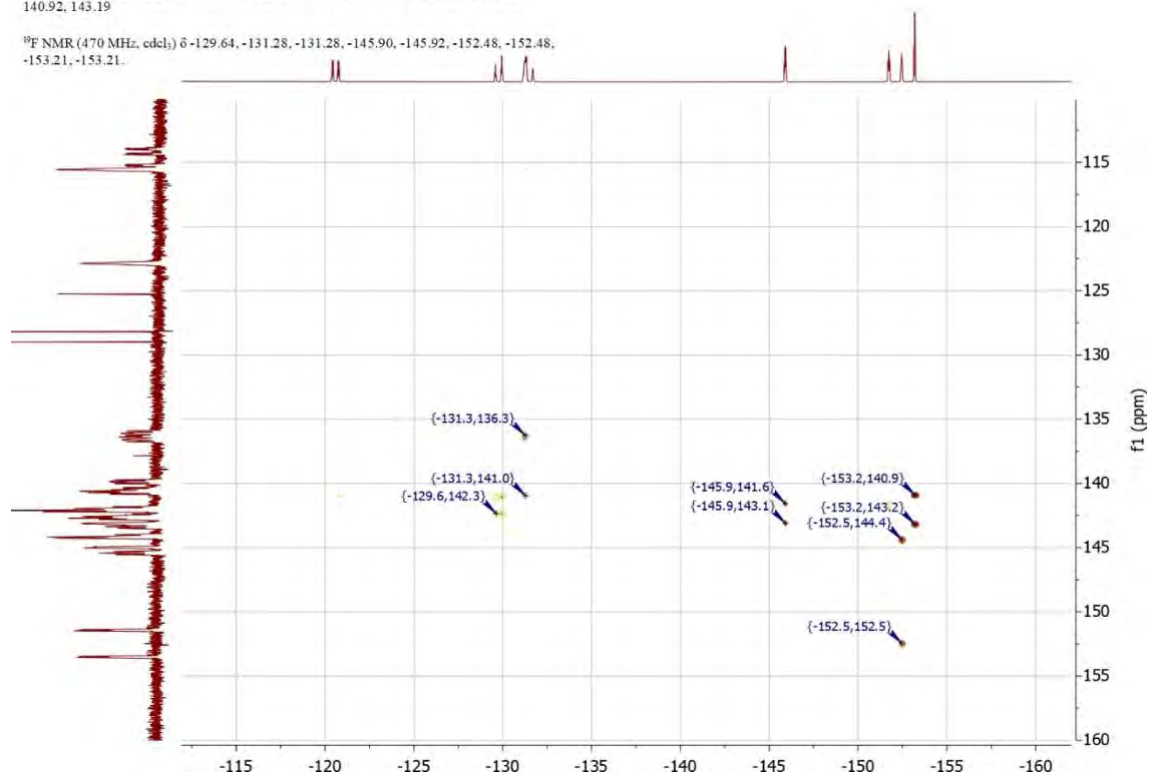

$^1\text{H}$  NMR Spectra of  $\text{FPh}_2\text{C}_6\text{F}_4\text{C}_6\text{F}_4$  (**8**) in  $\text{CDCl}_3$ .

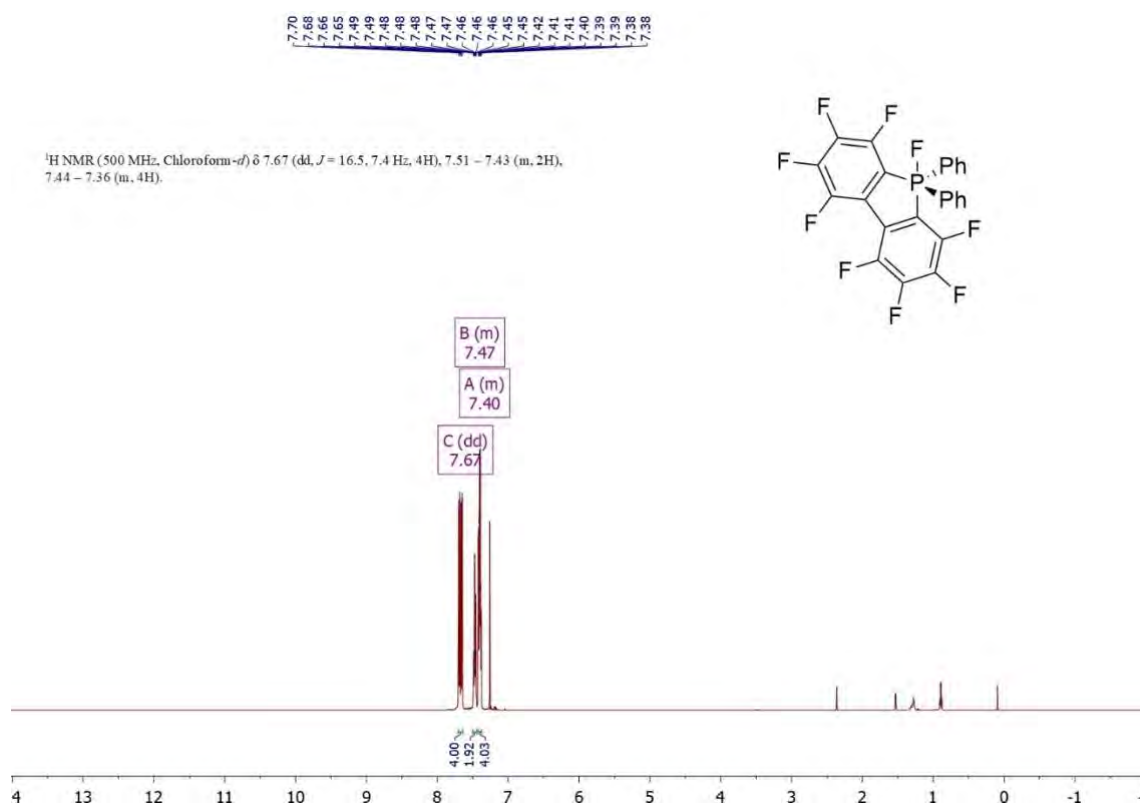

$^{19}\text{F}$  NMR Spectra of  $\text{FPh}_2\text{C}_6\text{F}_4\text{C}_6\text{F}_4$  (**8**) in  $\text{CDCl}_3$ .

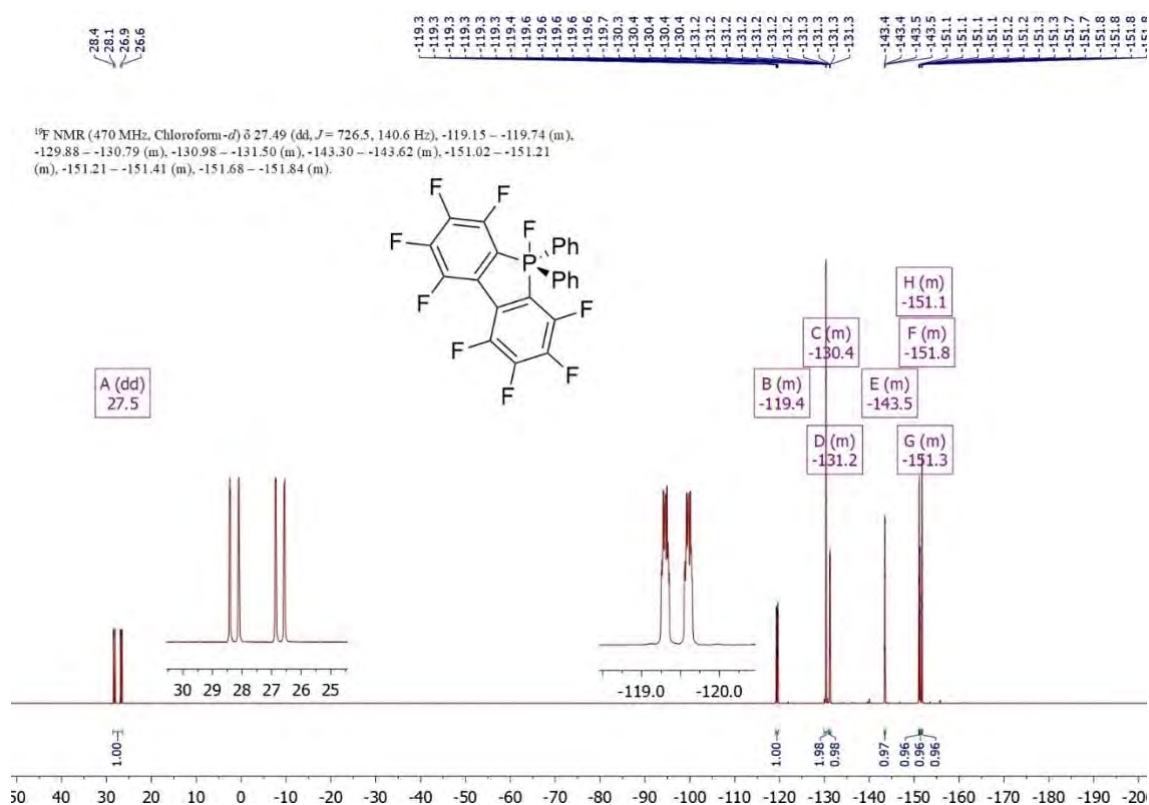

$^{31}\text{P}\{^1\text{H}\}$  NMR Spectra of  $\text{FPPh}_2\text{C}_6\text{F}_4\text{C}_6\text{F}_4$  (**8**) in  $\text{CDCl}_3$ .

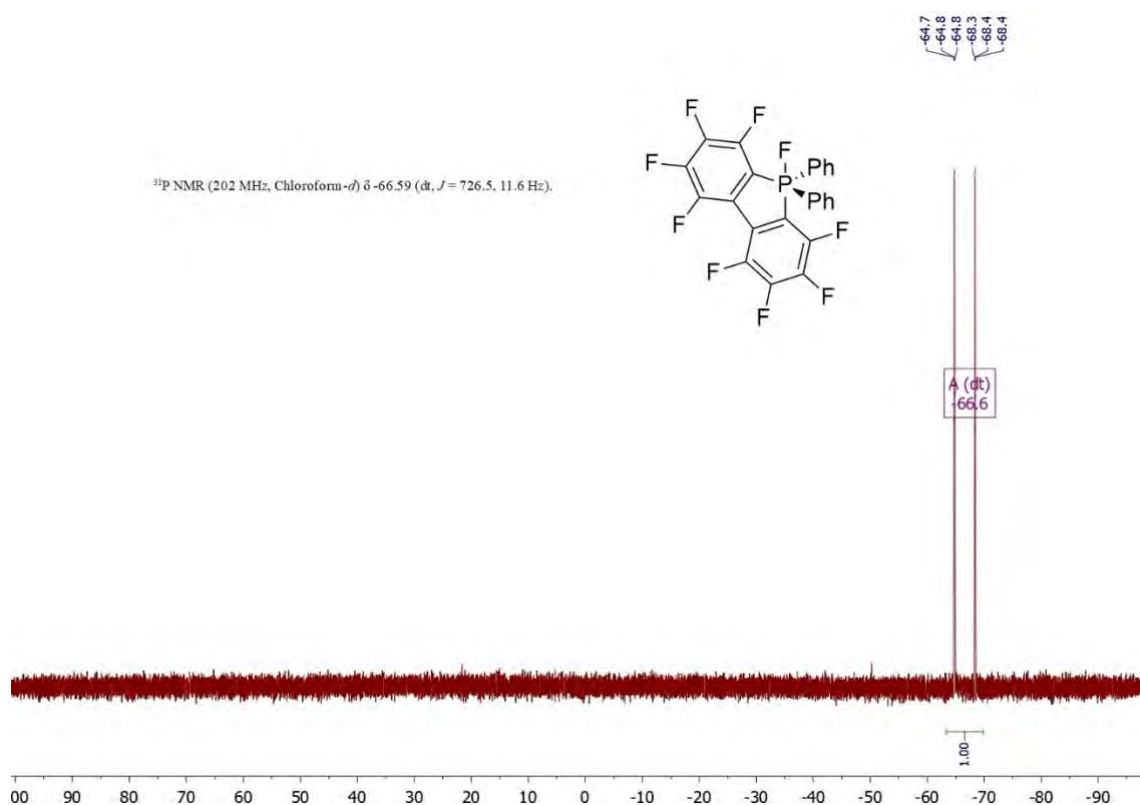

$^{13}\text{C}\{^1\text{H}\}$  NMR Spectra of  $\text{FPPh}_2\text{C}_6\text{F}_4\text{C}_6\text{F}_4$  (**8**) in  $\text{CDCl}_3$ .

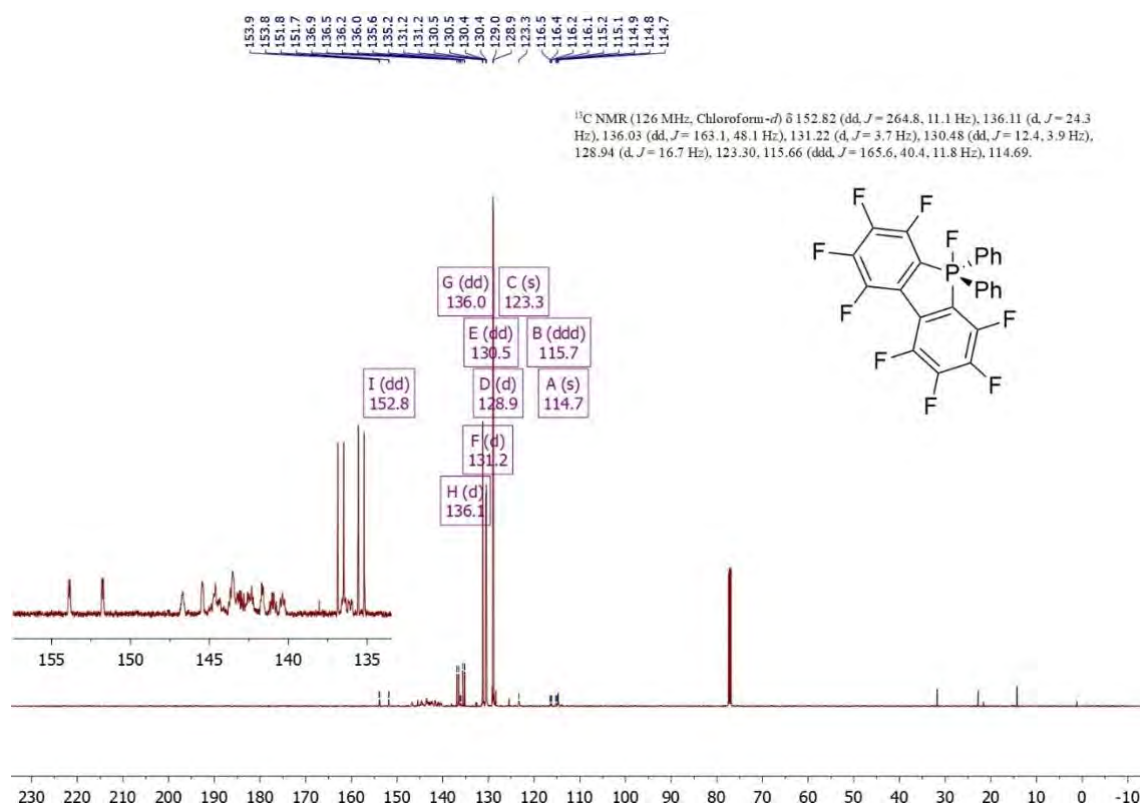

$^{13}\text{C}$ - $^{19}\text{F}$  HSQC NMR Spectra of  $\text{FPh}_2\text{C}_6\text{F}_4\text{C}_6\text{F}_4$  (**8**) in  $\text{CDCl}_3$ .

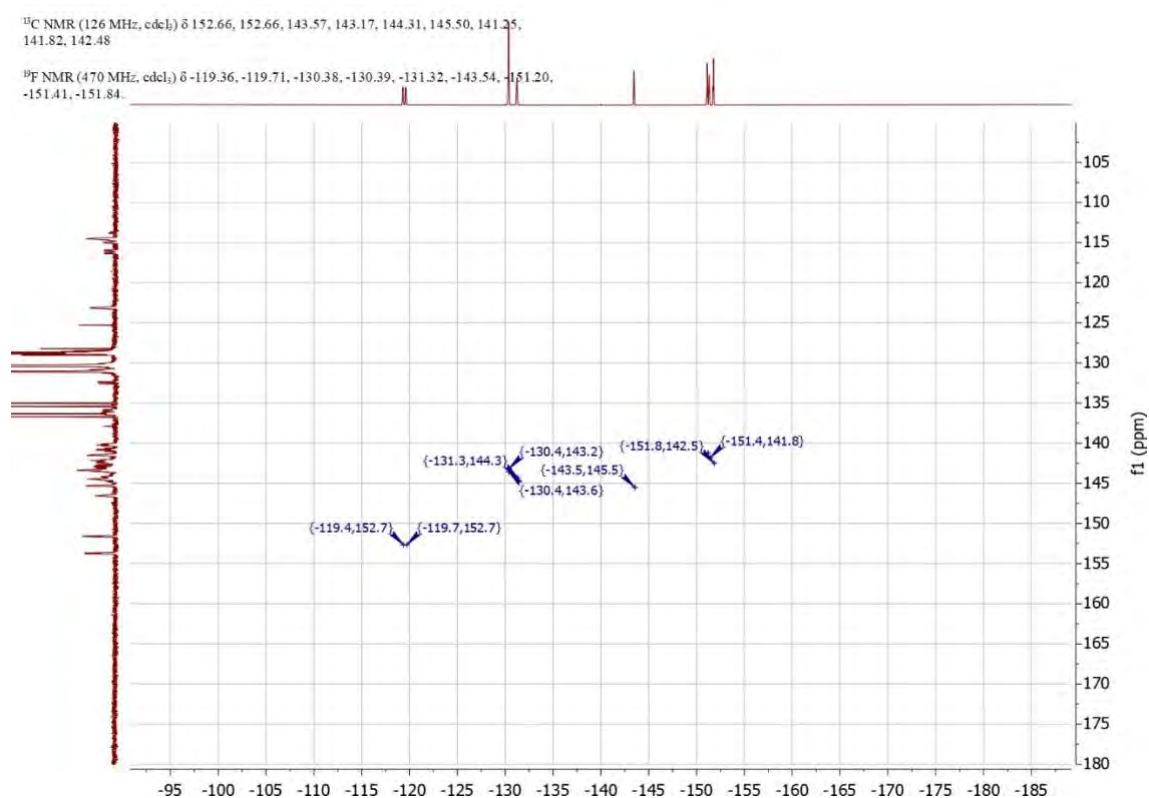

$^{19}\text{F}$  NMR Spectra of  $\text{FPCy}_2\text{C}_6\text{H}_4\text{C}_6\text{H}_4$  (**11**) in toluene- $d_8$ .

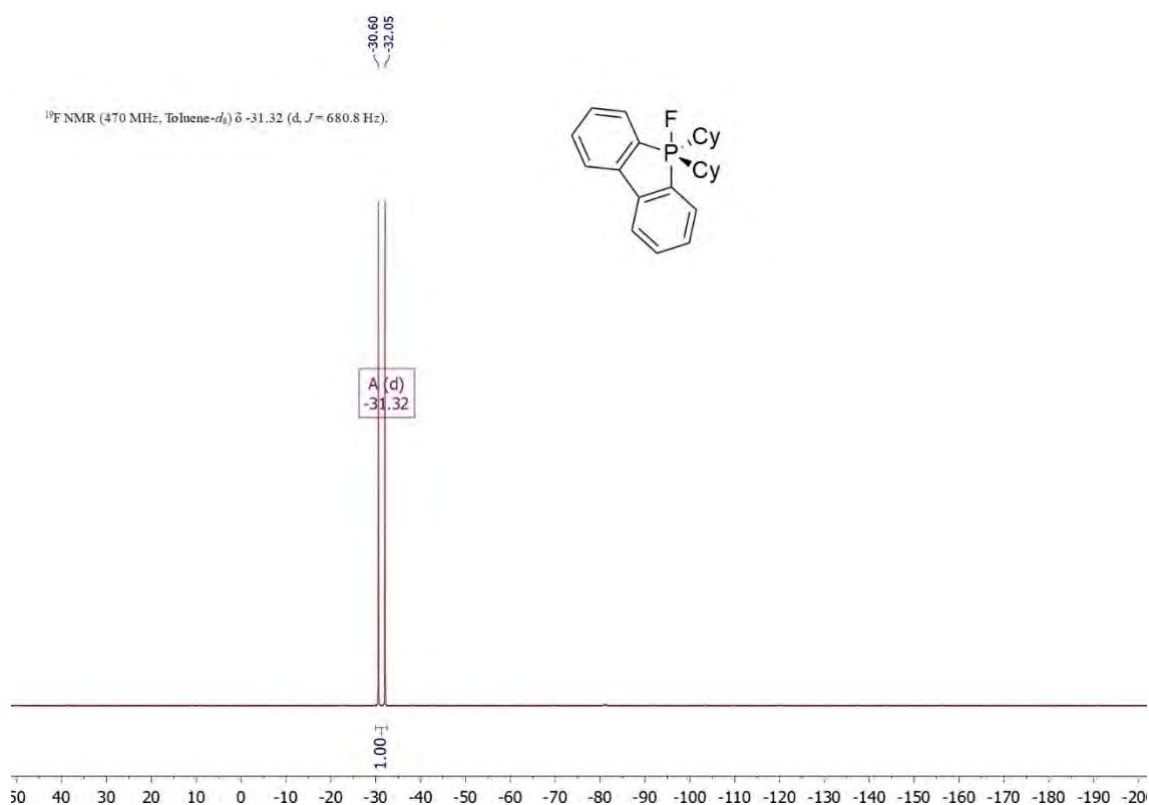

$^{31}\text{P}\{^1\text{H}\}$  NMR Spectra of  $\text{FPCy}_2\text{C}_6\text{H}_4\text{C}_6\text{H}_4$  (**11**) in toluene- $d_8$ .

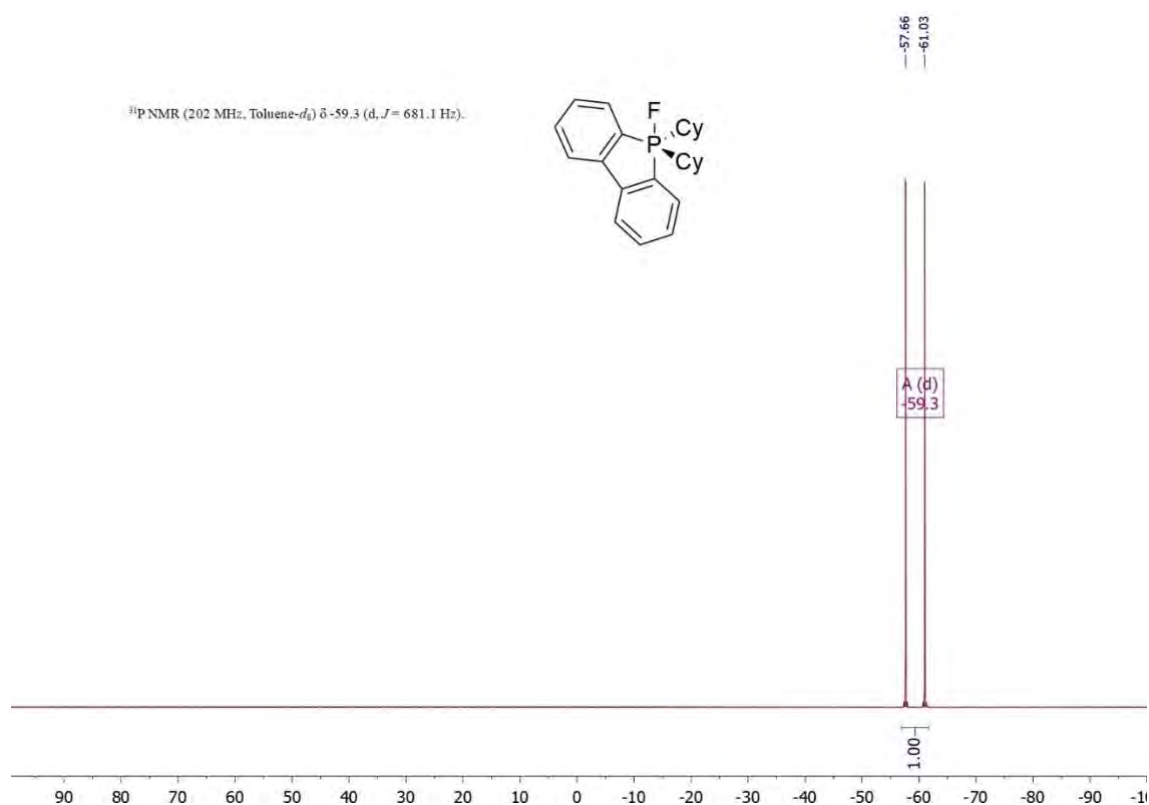

$^1\text{H}$  NMR Spectra of  $\text{FPCy}_2\text{C}_6\text{H}_4\text{C}_6\text{H}_4$  (**11**) in toluene- $d_8$  at 233 K.

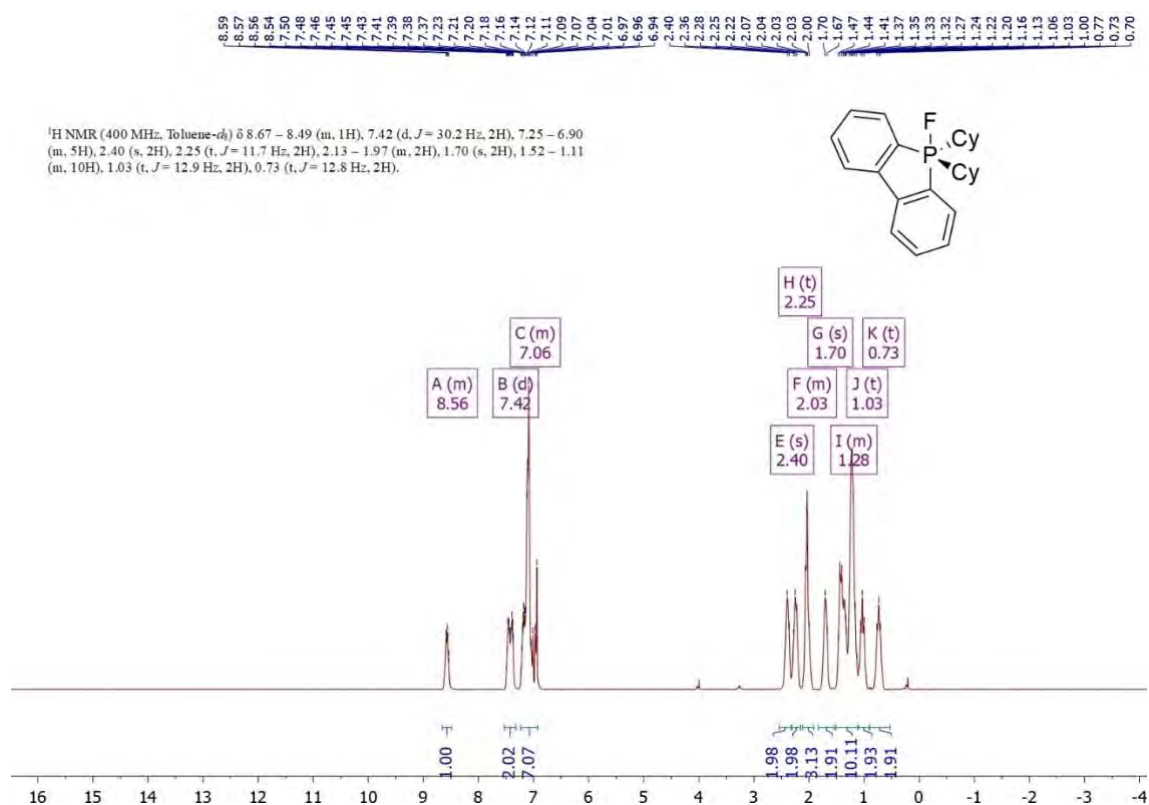

$^{19}\text{F}$  NMR Spectra of  $\text{FPCy}_2\text{C}_6\text{H}_4\text{C}_6\text{H}_4$  (**11**) in toluene- $d_8$  at 233 K.

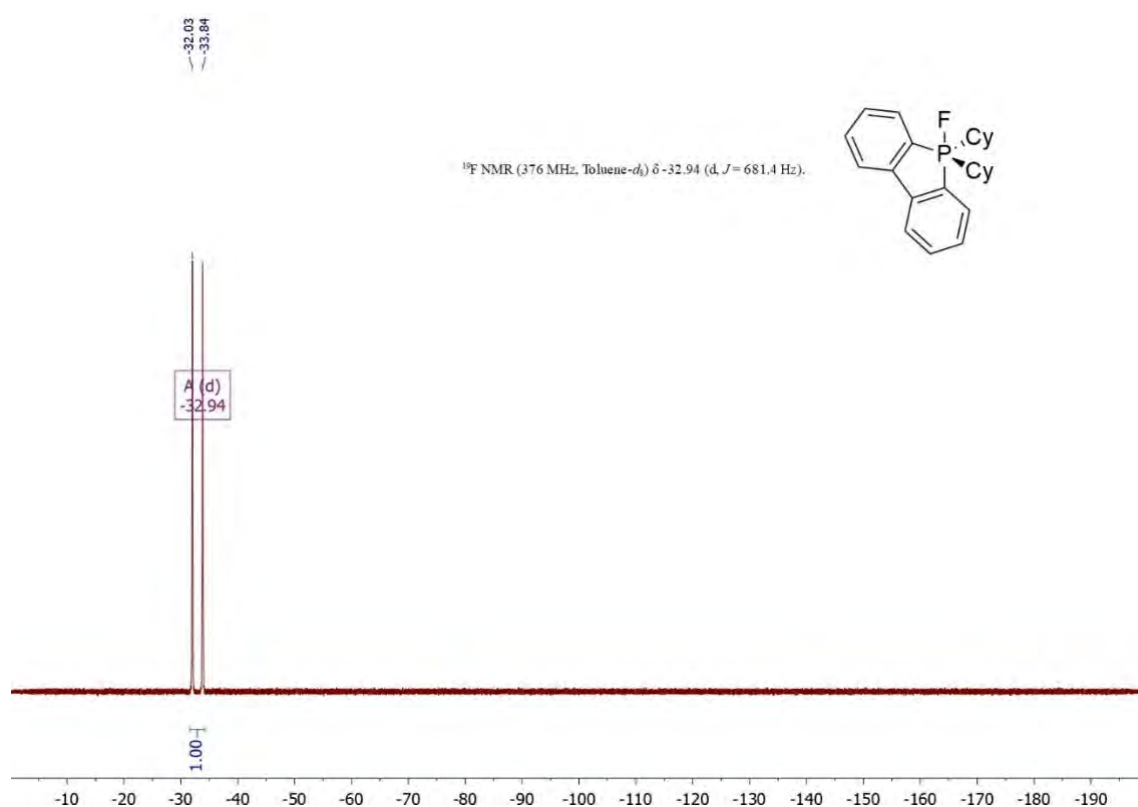

$^{31}\text{P}\{^1\text{H}\}$  NMR Spectra of  $\text{FPCy}_2\text{C}_6\text{H}_4\text{C}_6\text{H}_4$  (**11**) in toluene- $d_8$  at 233 K.

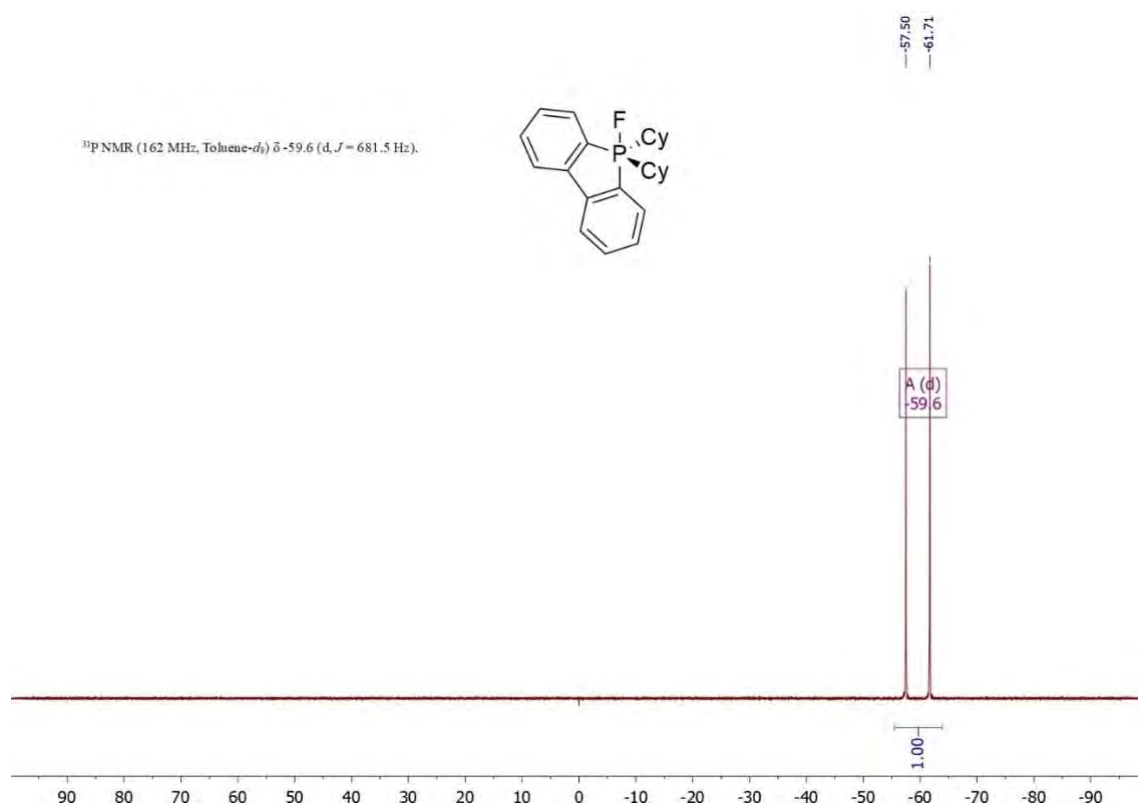

$^{13}\text{C}\{^1\text{H}\}$  NMR Spectra  $\text{FPCy}_2\text{C}_6\text{H}_4\text{C}_6\text{H}_4$  (**11**) in toluene- $d_8$  at 233 K.

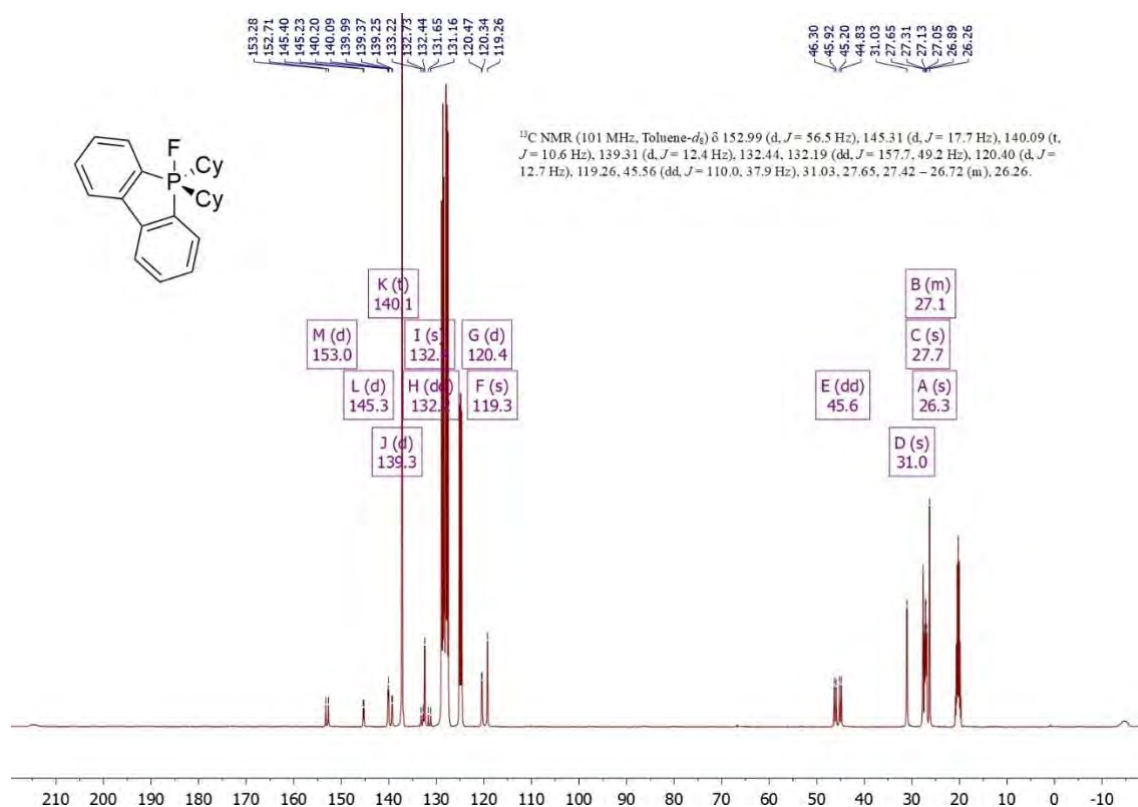

$^1\text{H}$ - $^{13}\text{C}$  HSQC NMR Spectra of  $\text{FPCy}_2\text{C}_6\text{H}_4\text{C}_6\text{H}_4$  (**11**) in toluene- $d_8$  at 233 K.

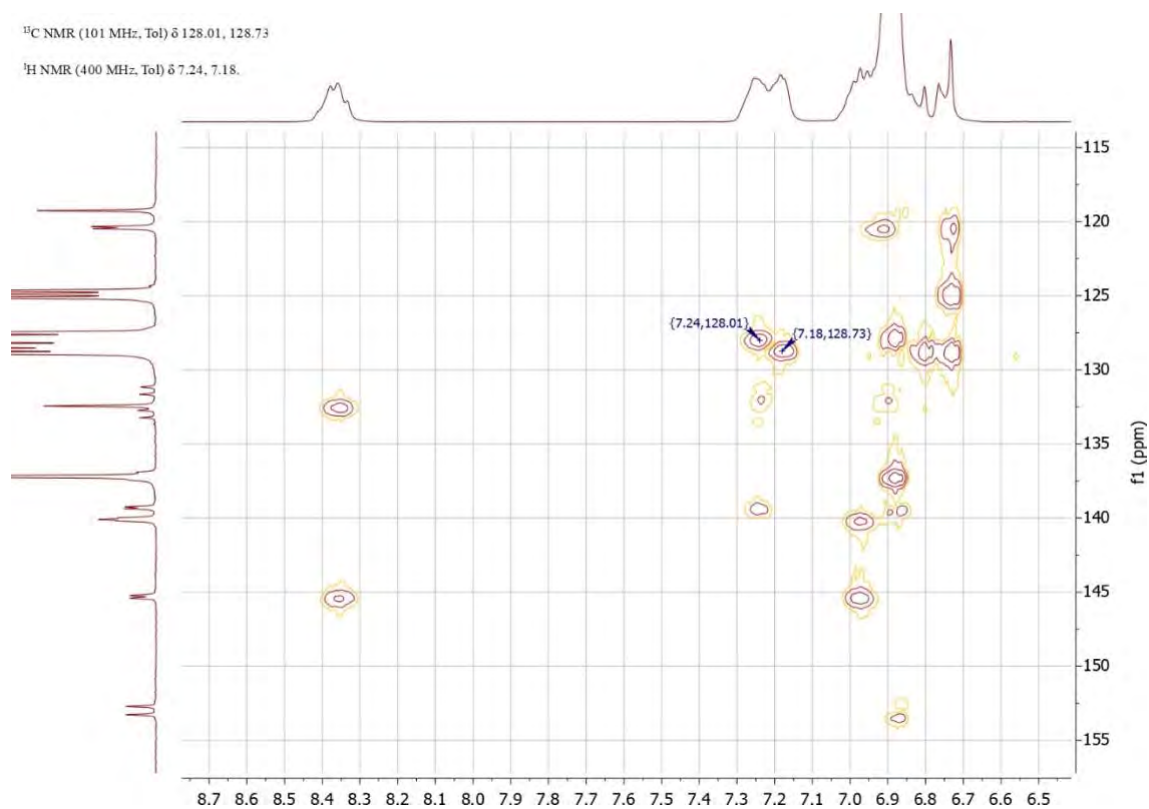

$^1\text{H}$  NMR Spectra of  $\text{FPh}_2\text{C}_6\text{H}_4\text{C}_6\text{H}_4$  (**13**) in toluene- $d_8$  at 233 K.

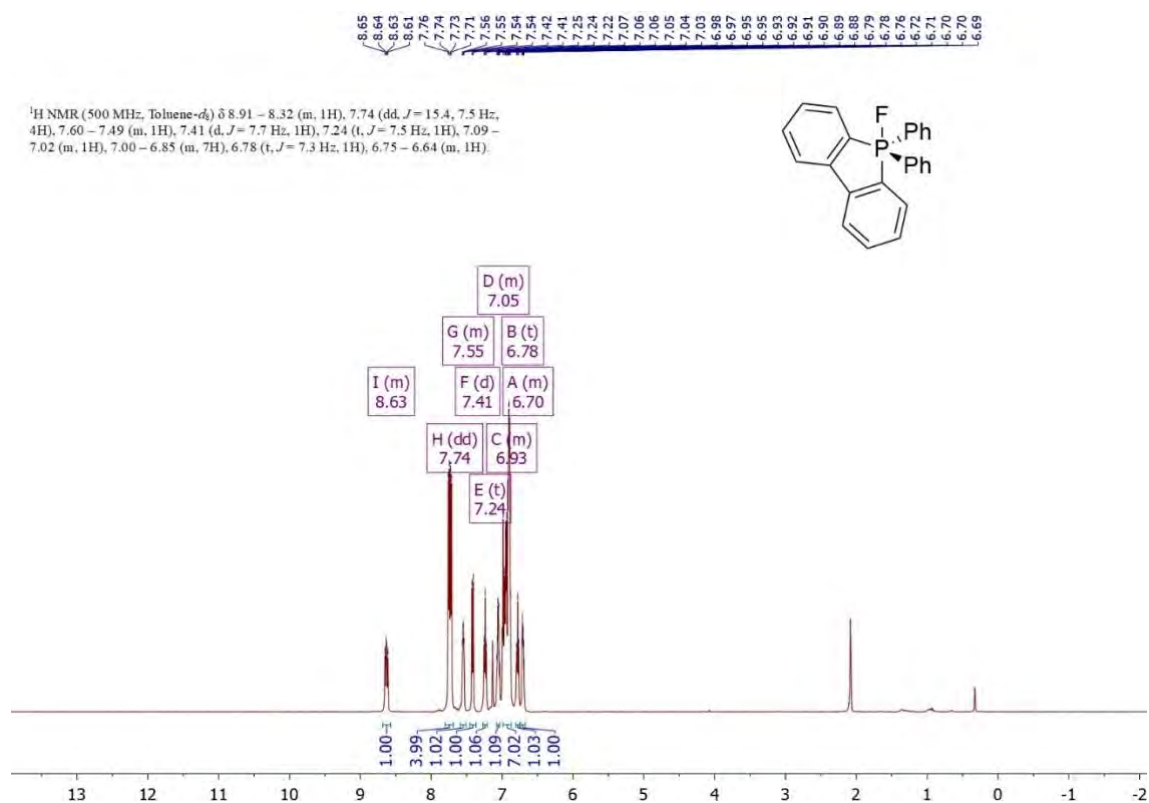

$^{19}\text{F}$  NMR Spectra of  $\text{FPh}_2\text{C}_6\text{H}_4\text{C}_6\text{H}_4$  (**13**) in toluene- $d_8$  at 233 K.

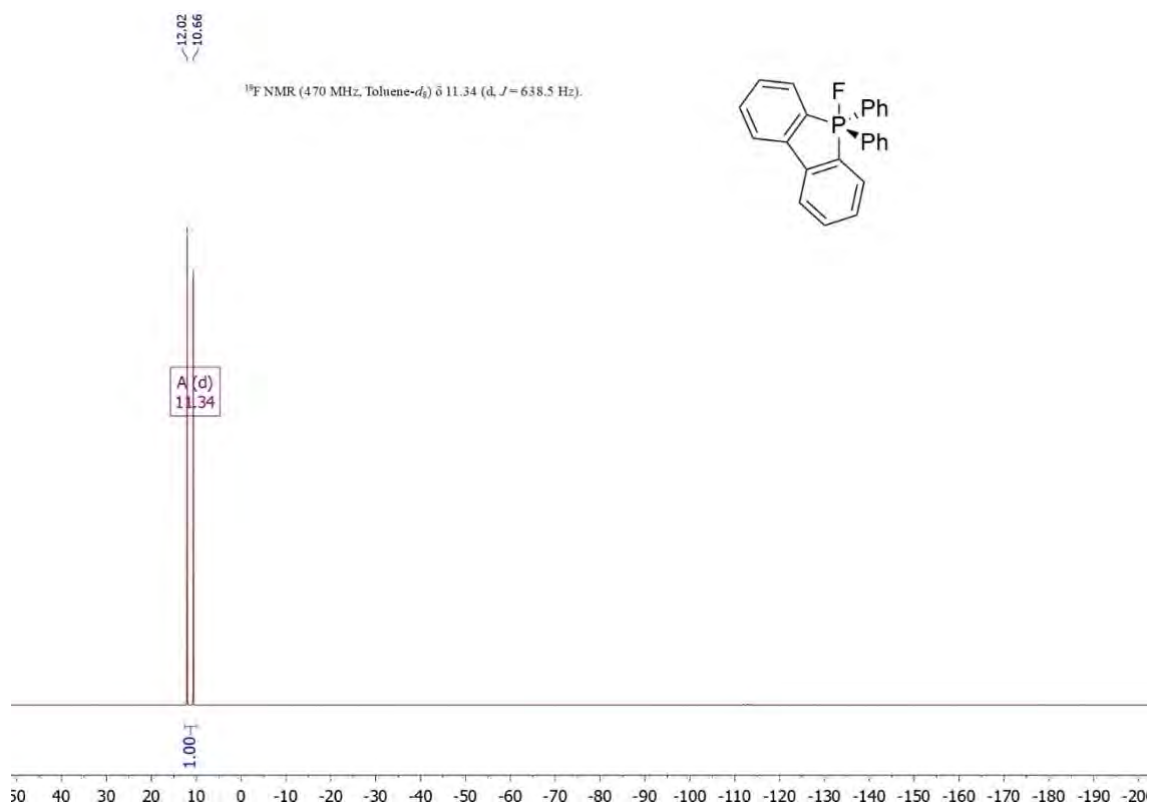

$^{31}\text{P}\{^1\text{H}\}$  NMR Spectra of  $\text{FPPh}_2\text{C}_6\text{H}_4\text{C}_6\text{H}_4$  (**13**) in toluene- $d_8$  at 233 K.

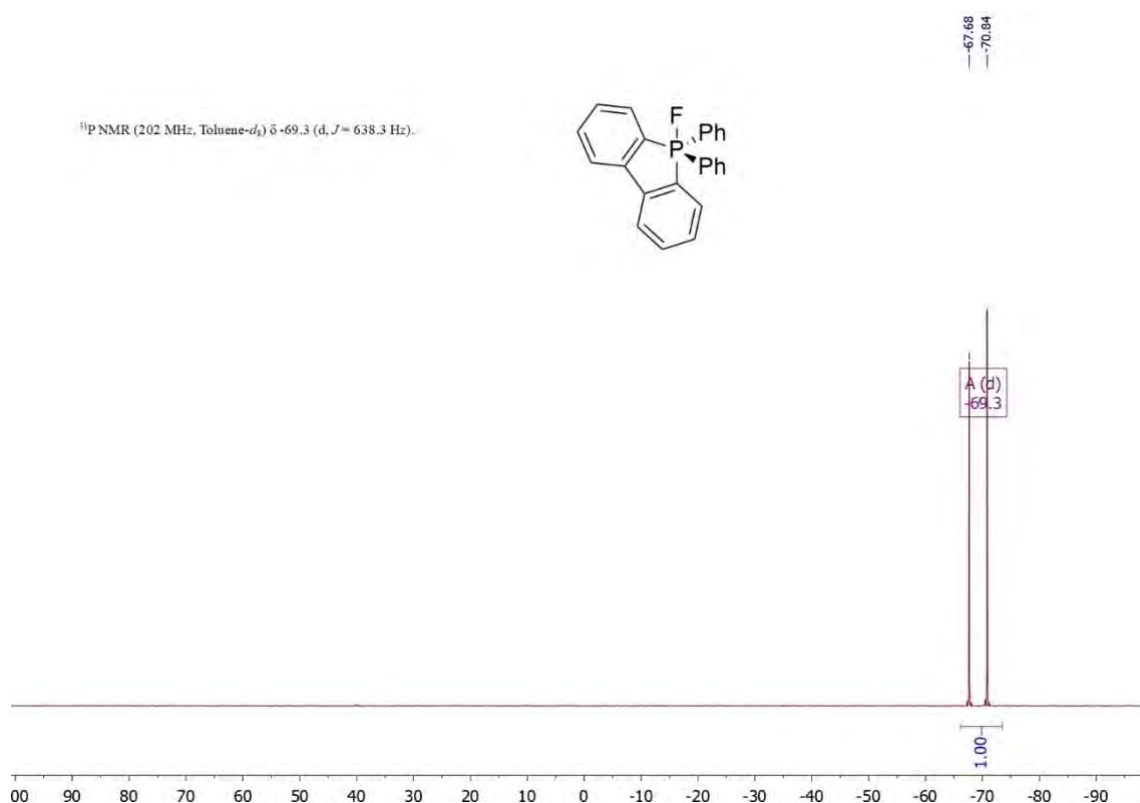

$^{13}\text{C}\{^1\text{H}\}$  NMR Spectra  $\text{FPPh}_2\text{C}_6\text{H}_4\text{C}_6\text{H}_4$  (**13**) in toluene- $d_8$  at 233 K.

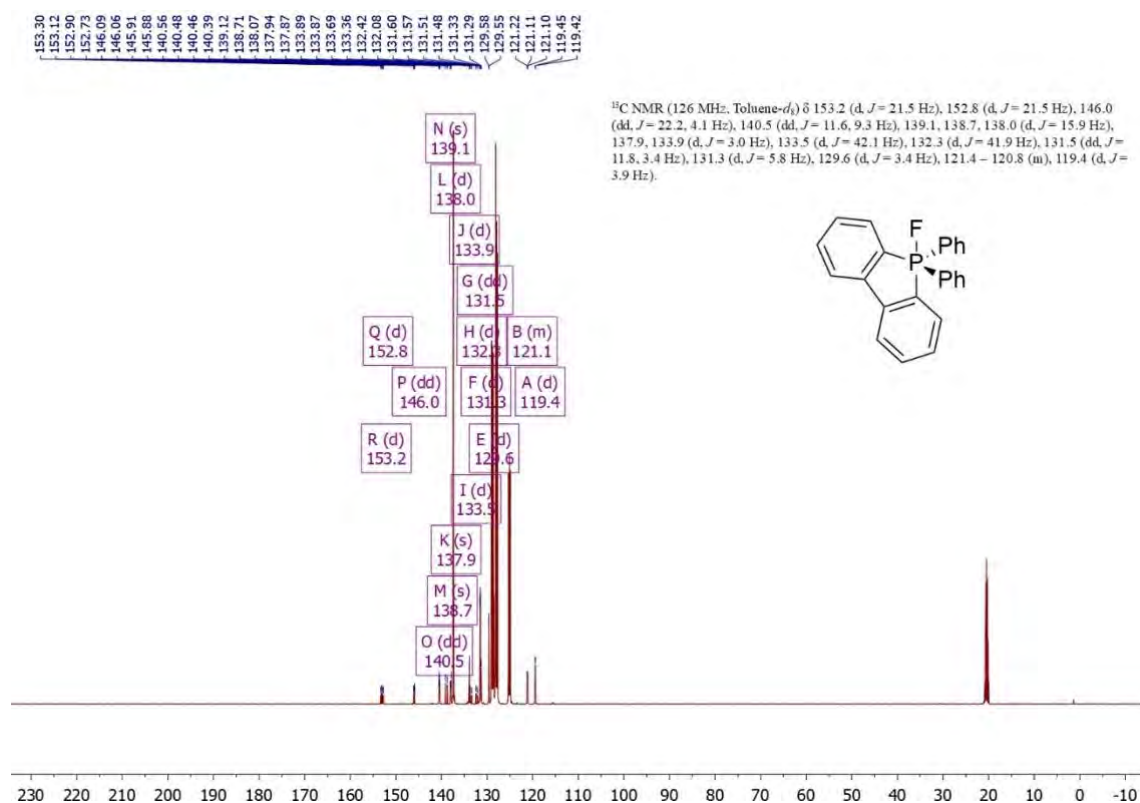

$^1\text{H}$  NMR Spectra of  $\text{FPCy}_2\text{C}_6\text{H}_2(\text{OMe})_2\text{C}_6\text{H}_4$  (**15**) in toluene- $d_8$  at 233 K.

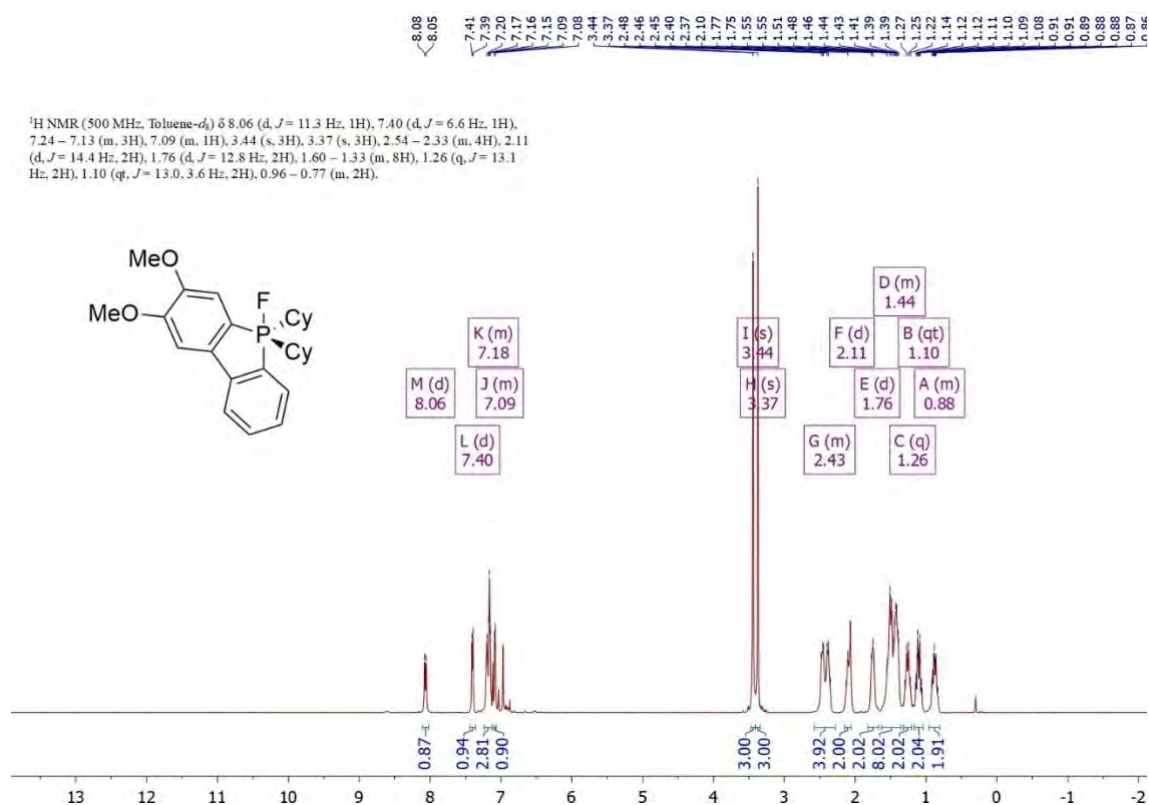

$^{19}\text{F}$  NMR Spectra of  $\text{FPCy}_2\text{C}_6\text{H}_2(\text{OMe})_2\text{C}_6\text{H}_4$  (**15**) in toluene- $d_8$  at 233 K.

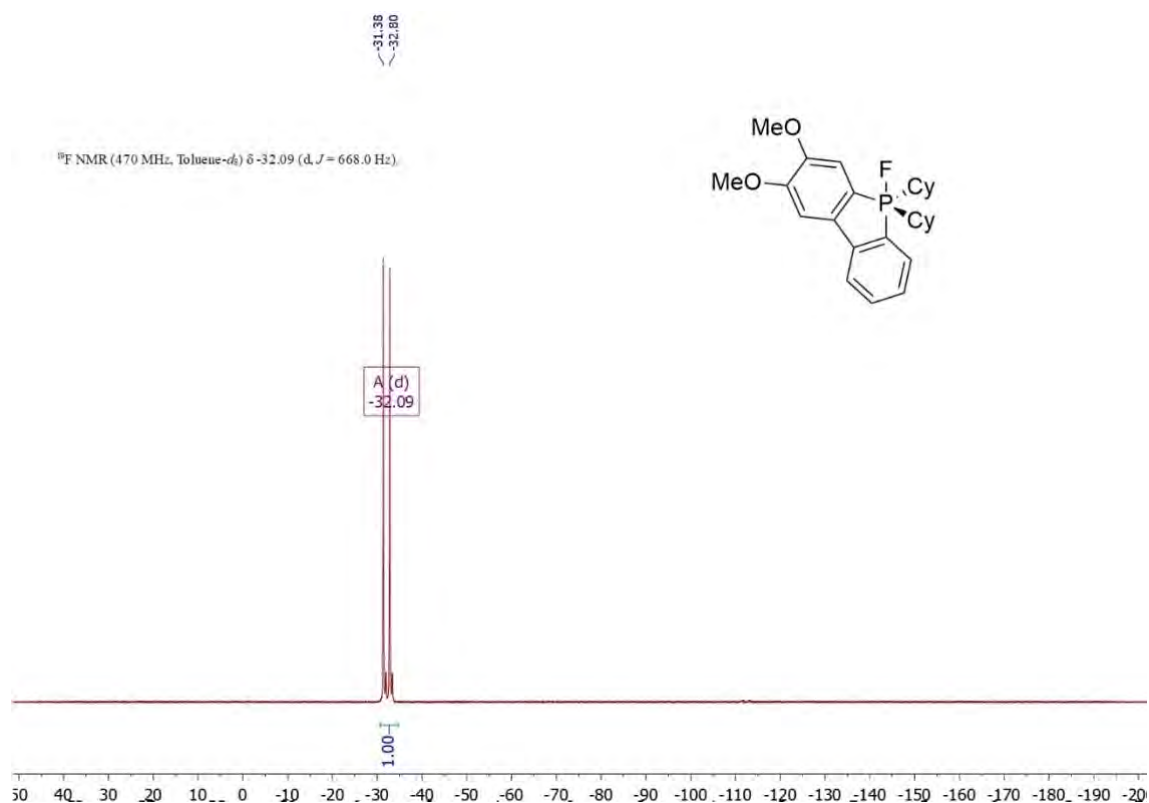

$^{31}\text{P}\{^1\text{H}\}$  NMR Spectra of  $\text{FPCy}_2\text{C}_6\text{H}_2(\text{OMe})_2\text{C}_6\text{H}_4$  (**15**) in toluene- $d_8$  at 233 K.

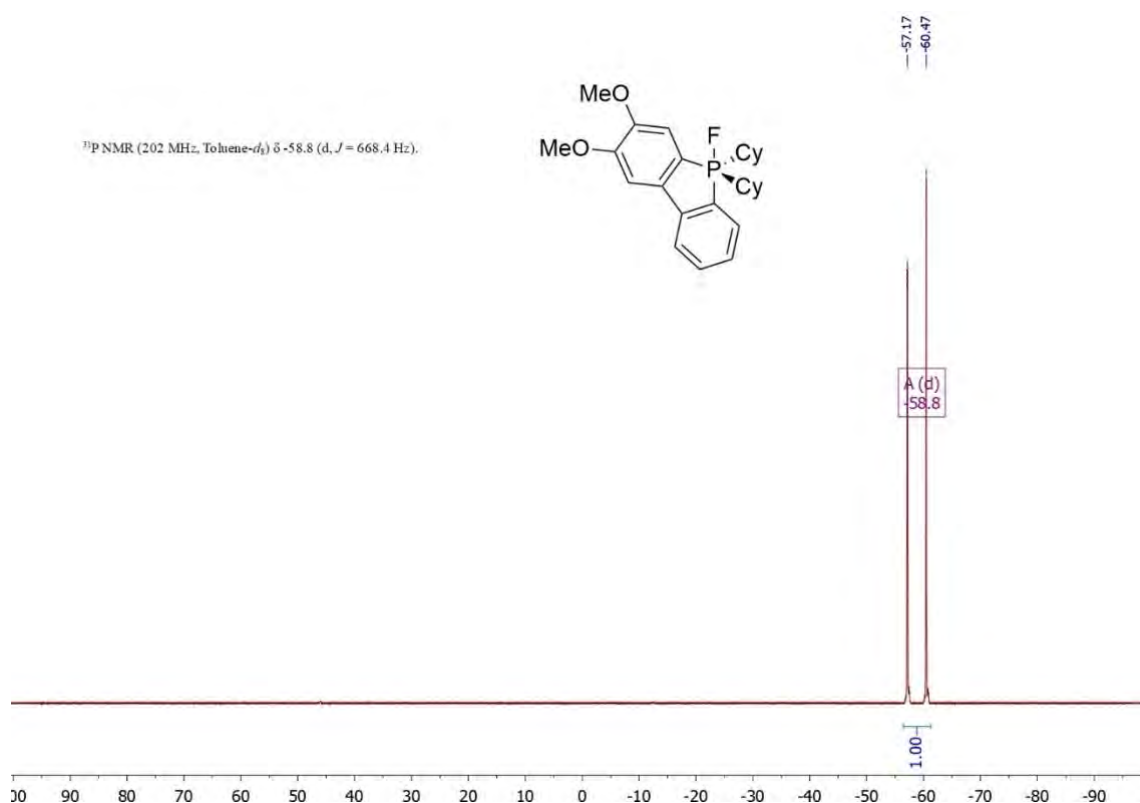

$^{13}\text{C}\{^1\text{H}\}$  NMR Spectra  $\text{FPCy}_2\text{C}_6\text{H}_2(\text{OMe})_2\text{C}_6\text{H}_4$  (**15**) in toluene- $d_8$  at 233 K.

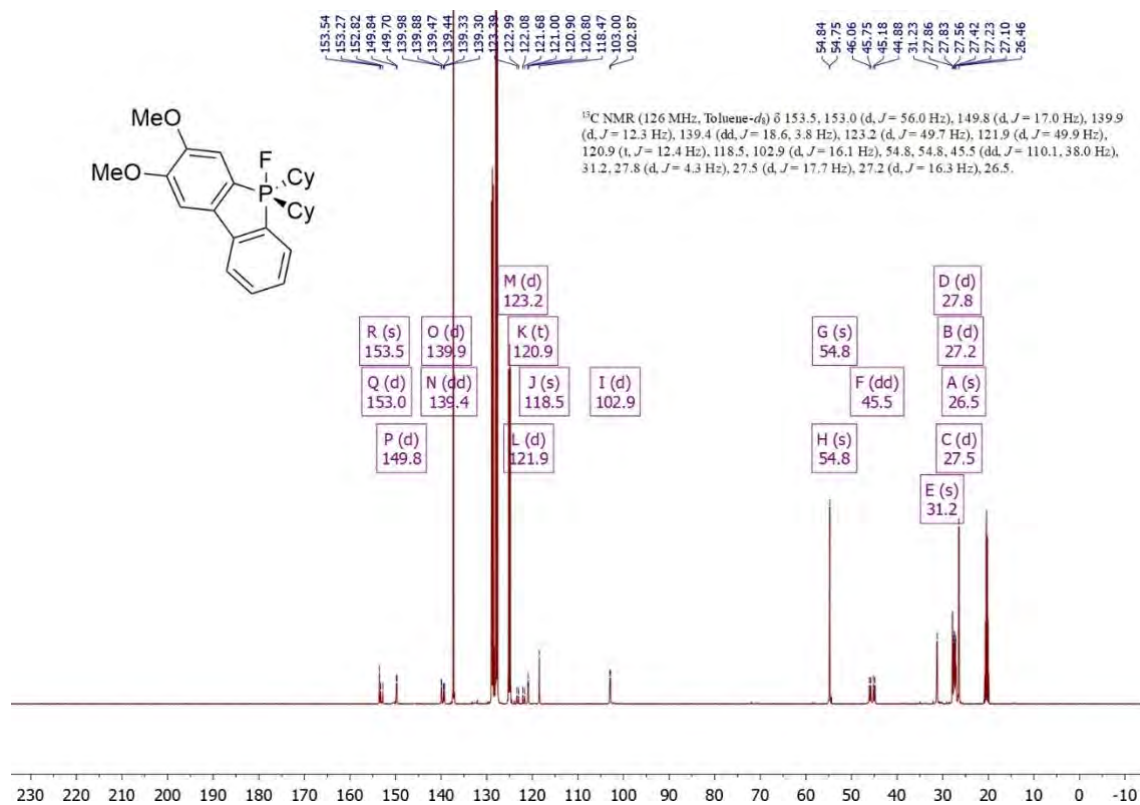

<sup>1</sup>H NMR Spectra of PCy<sub>2</sub>C<sub>6</sub>H<sub>4</sub>C<sub>6</sub>H<sub>4</sub>F (**10**) in CDCl<sub>3</sub>.

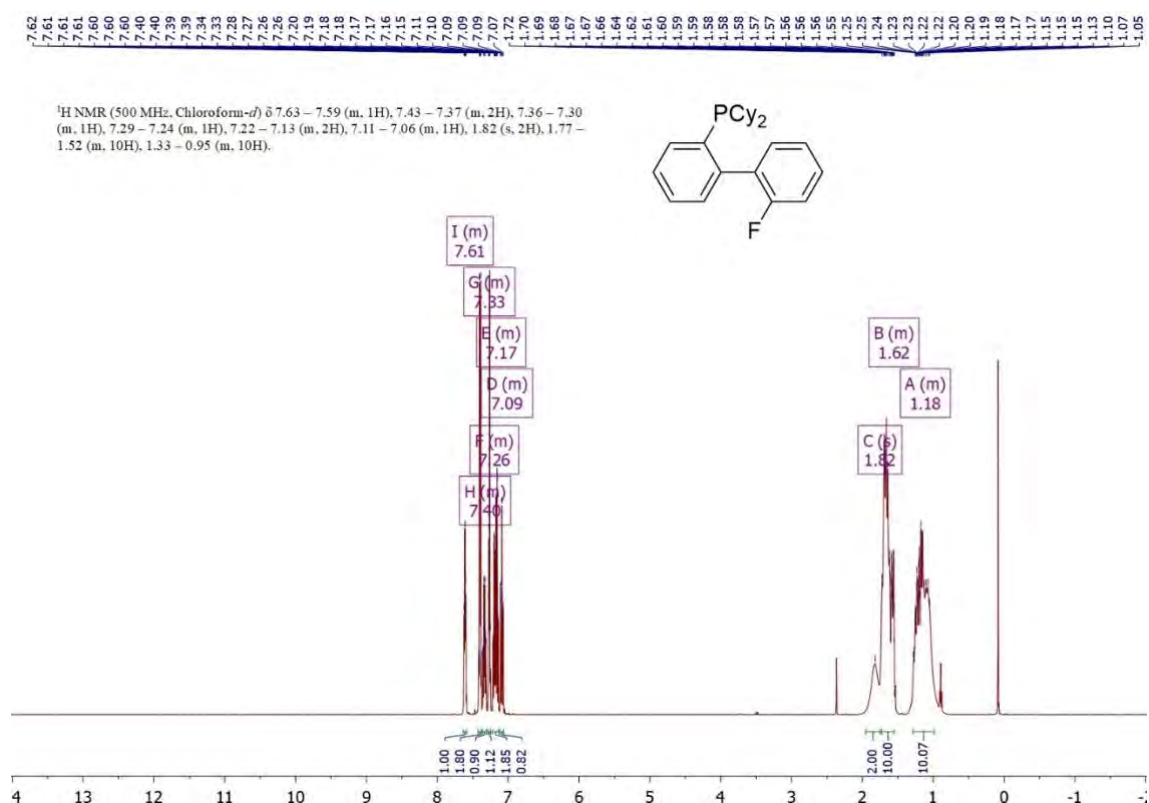

<sup>19</sup>F NMR Spectra of PCy<sub>2</sub>C<sub>6</sub>H<sub>4</sub>C<sub>6</sub>H<sub>4</sub>F (**10**) in CDCl<sub>3</sub>.

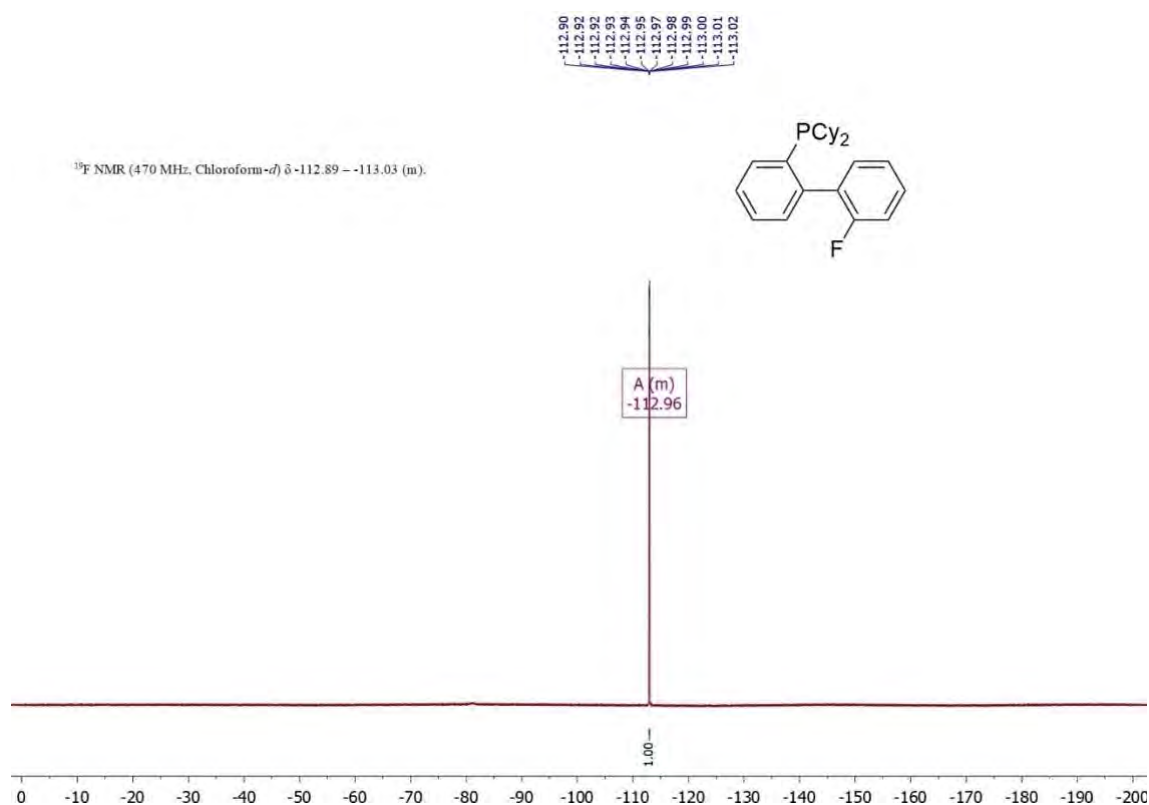

$^{31}\text{P}\{^1\text{H}\}$  NMR Spectra of  $\text{PCy}_2\text{C}_6\text{H}_4\text{C}_6\text{H}_4\text{F}$  (**10**) in  $\text{CDCl}_3$ .

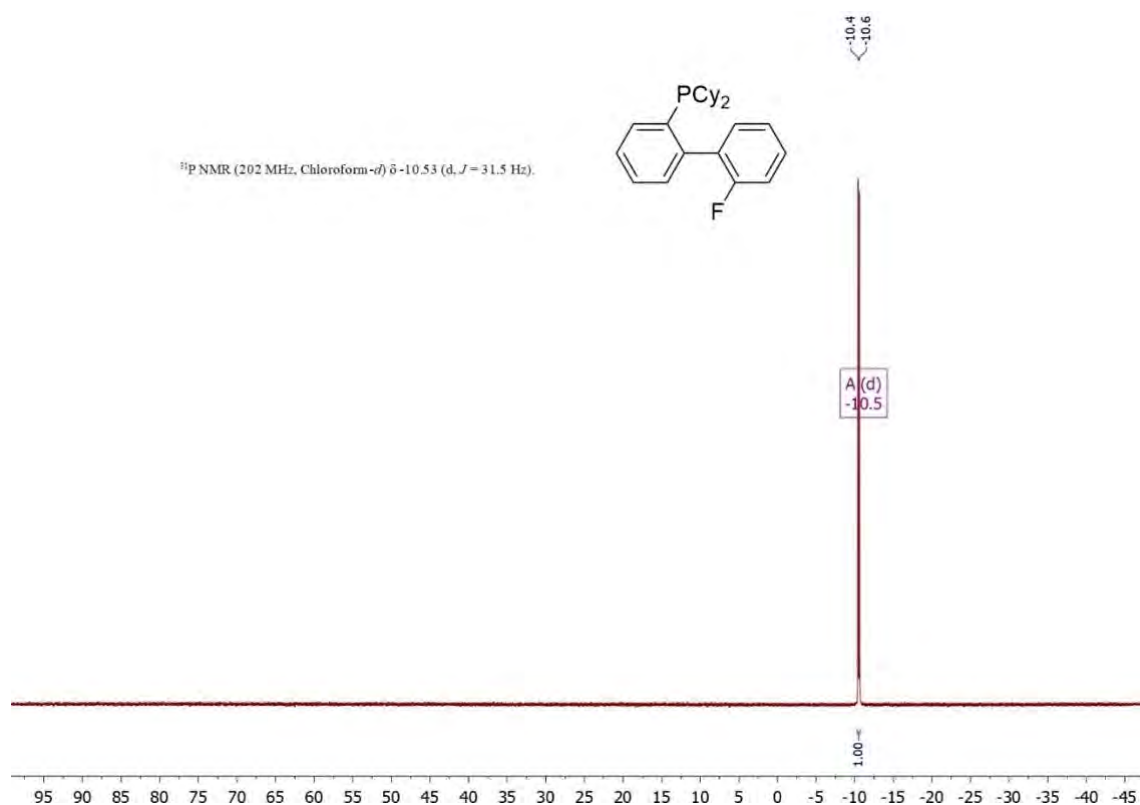

$^{13}\text{C}\{^1\text{H}\}$  NMR Spectra of  $\text{PCy}_2\text{C}_6\text{H}_4\text{C}_6\text{H}_4\text{F}$  (**10**) in  $\text{CDCl}_3$ .

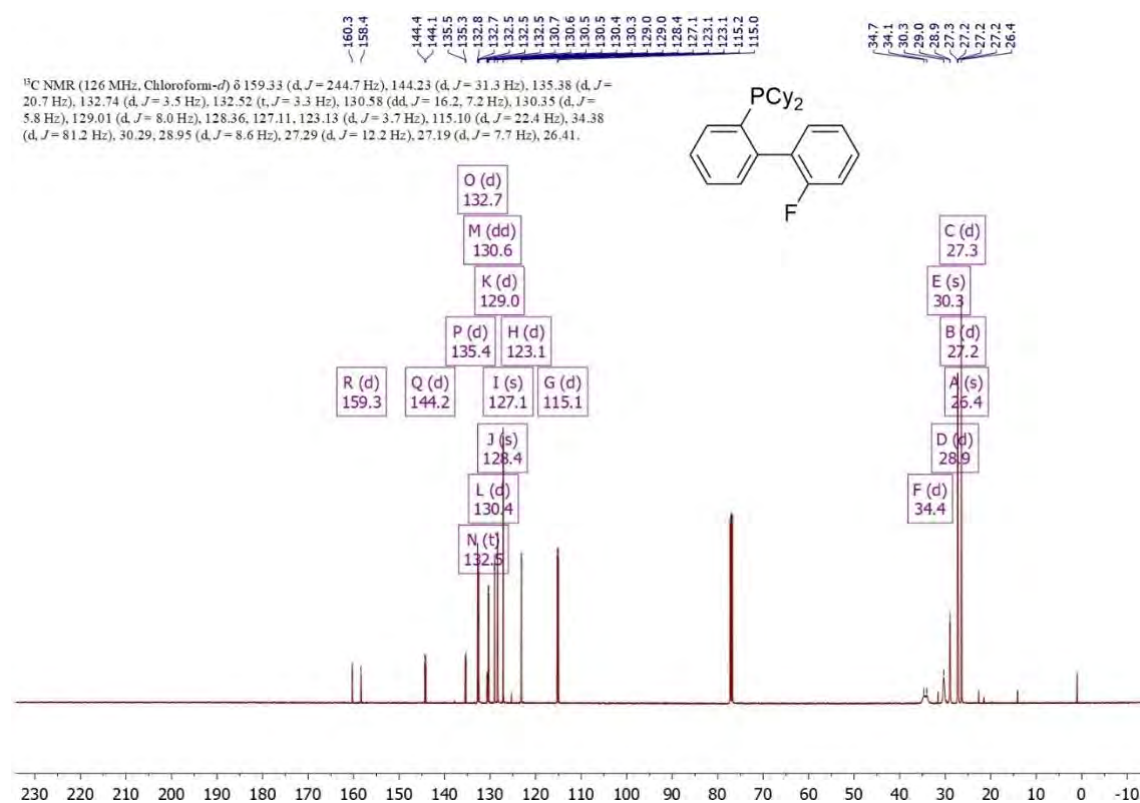

$^1\text{H}$  NMR Spectra of  $\text{PPh}_2\text{C}_6\text{H}_4\text{C}_6\text{H}_4\text{F}$  (**12**) in  $\text{CDCl}_3$ .

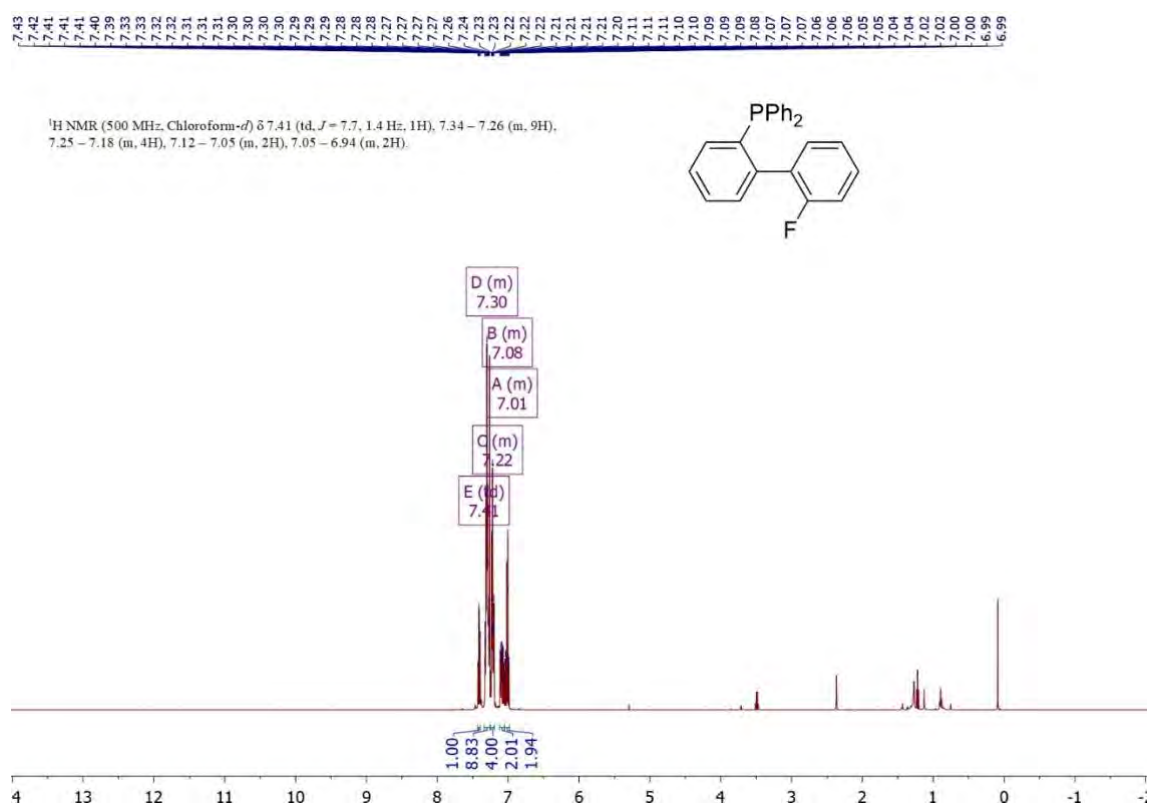

$^{19}\text{F}$  NMR Spectra of  $\text{PPh}_2\text{C}_6\text{H}_4\text{C}_6\text{H}_4\text{F}$  (**12**) in  $\text{CDCl}_3$ .

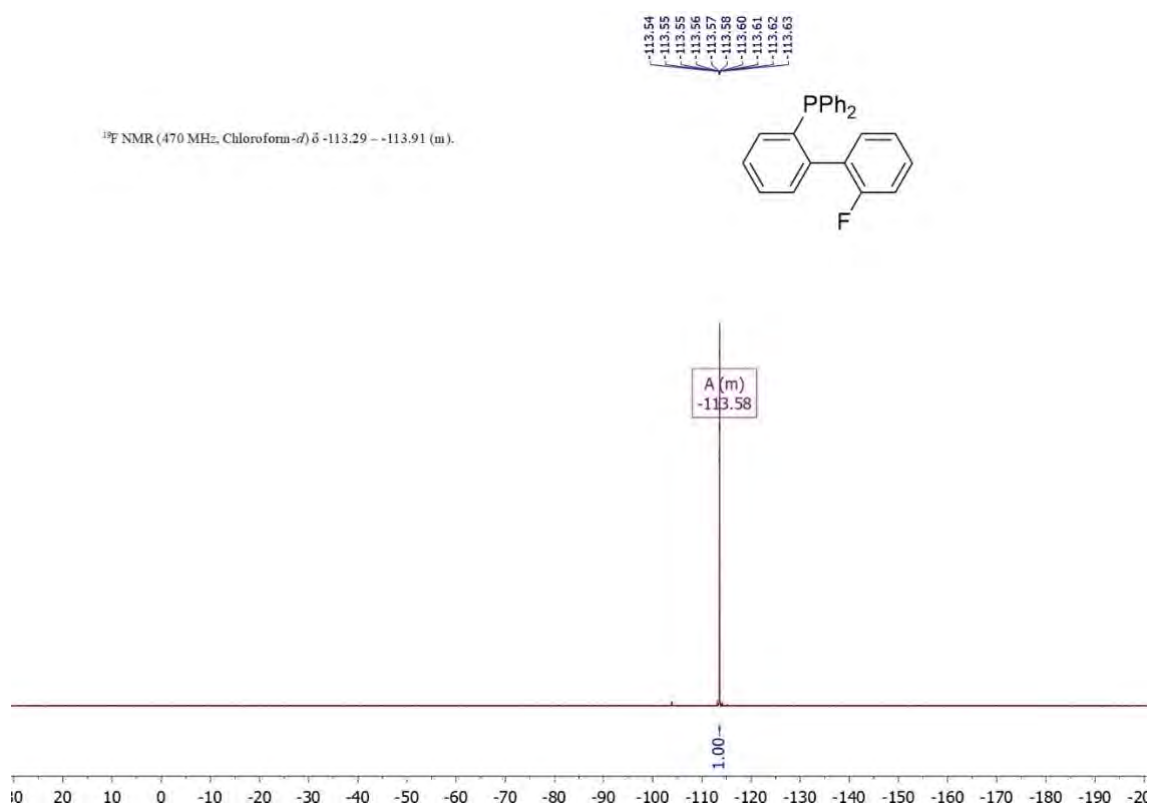

$^{31}\text{P}\{^1\text{H}\}$  NMR Spectra of  $\text{PPh}_2\text{C}_6\text{H}_4\text{C}_6\text{H}_4\text{F}$  (**12**) in  $\text{CDCl}_3$ .

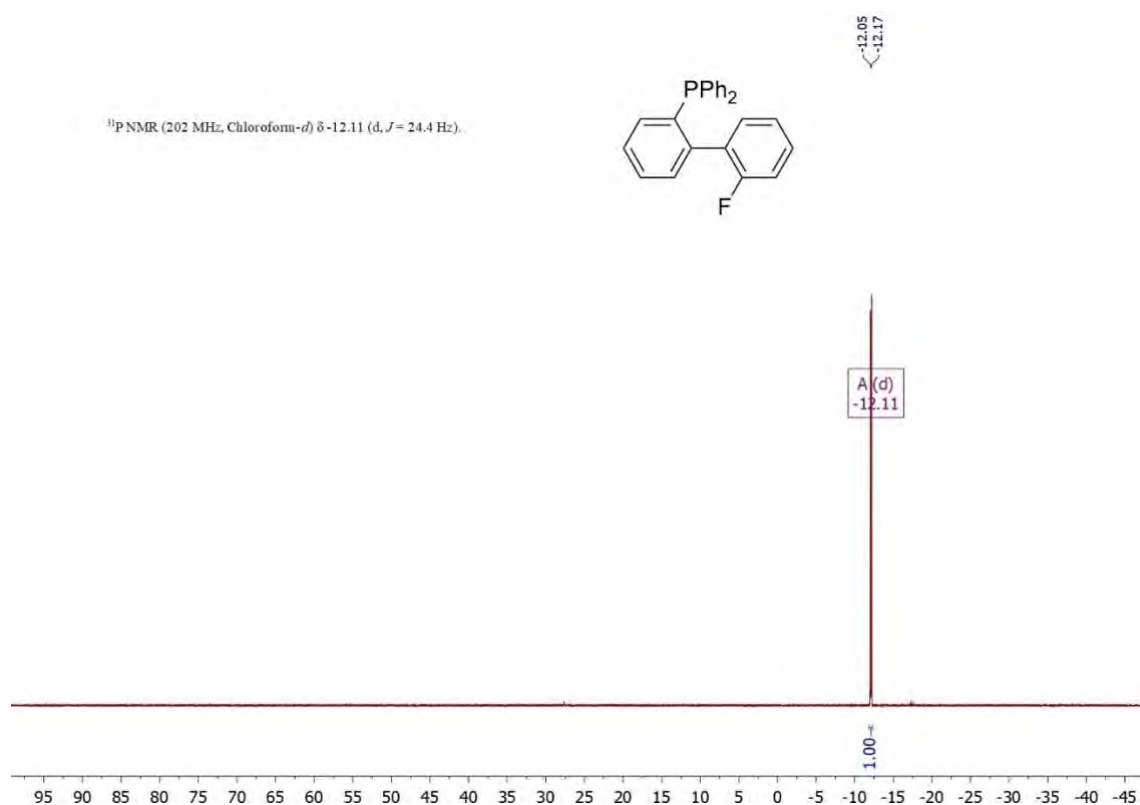

$^{13}\text{C}\{^1\text{H}\}$  NMR Spectra of  $\text{PPh}_2\text{C}_6\text{H}_4\text{C}_6\text{H}_4\text{F}$  (**12**) in  $\text{CDCl}_3$ .

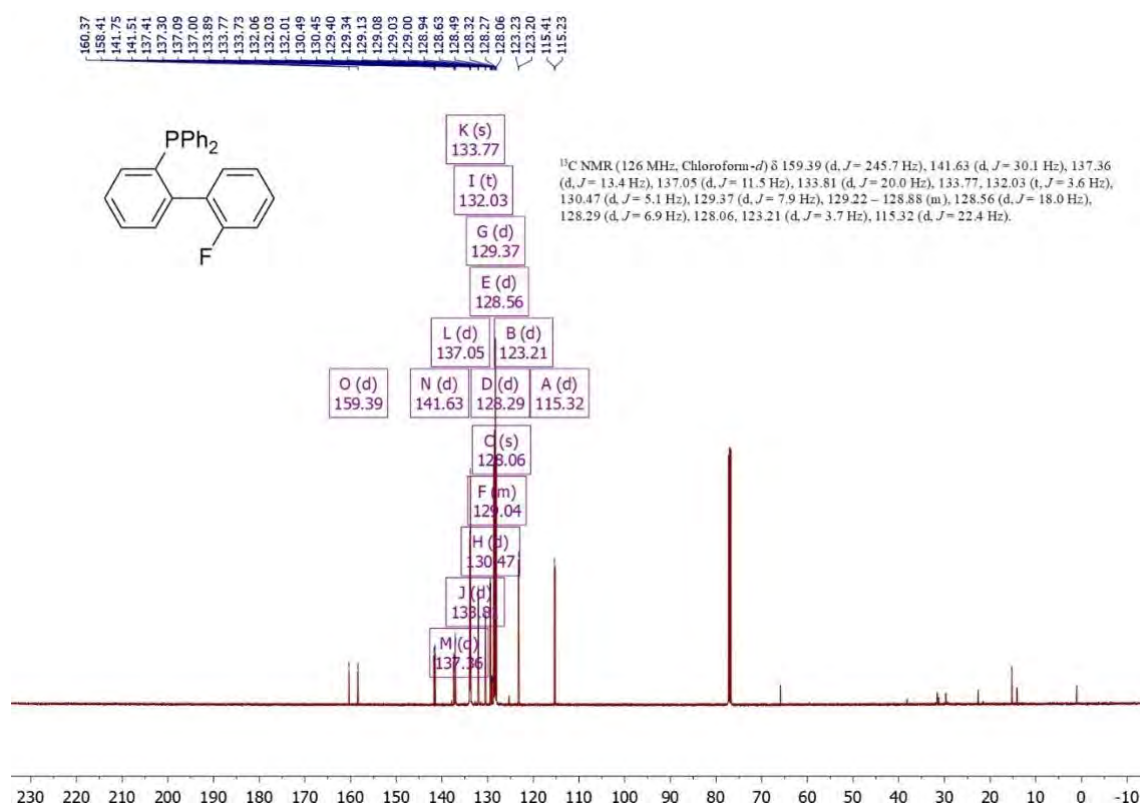

$^1\text{H}$  NMR Spectra of  $\text{C}_6\text{H}_2\text{Br}(\text{OMe})_2\text{C}_6\text{H}_4\text{F}$  (**9-OMe**) in  $\text{CDCl}_3$ .

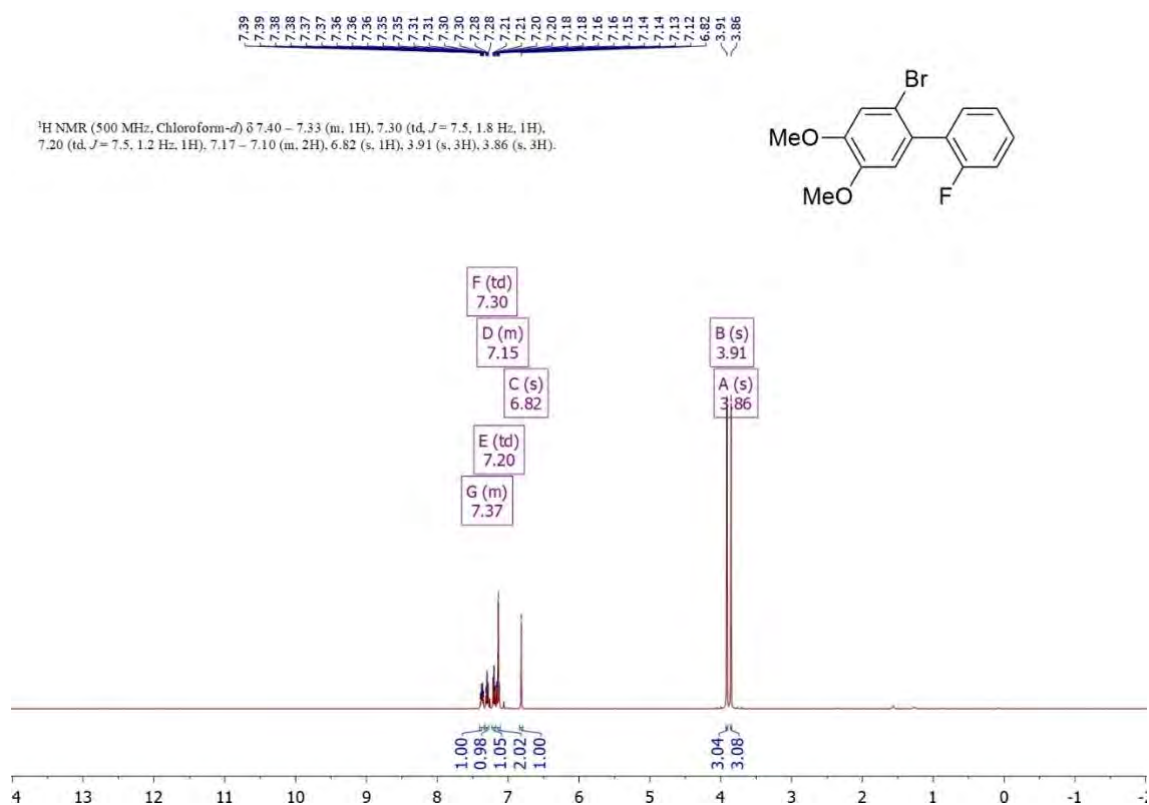

$^{19}\text{F}$  NMR Spectra of  $\text{C}_6\text{H}_2\text{Br}(\text{OMe})_2\text{C}_6\text{H}_4\text{F}$  (**9-OMe**) in  $\text{CDCl}_3$ .

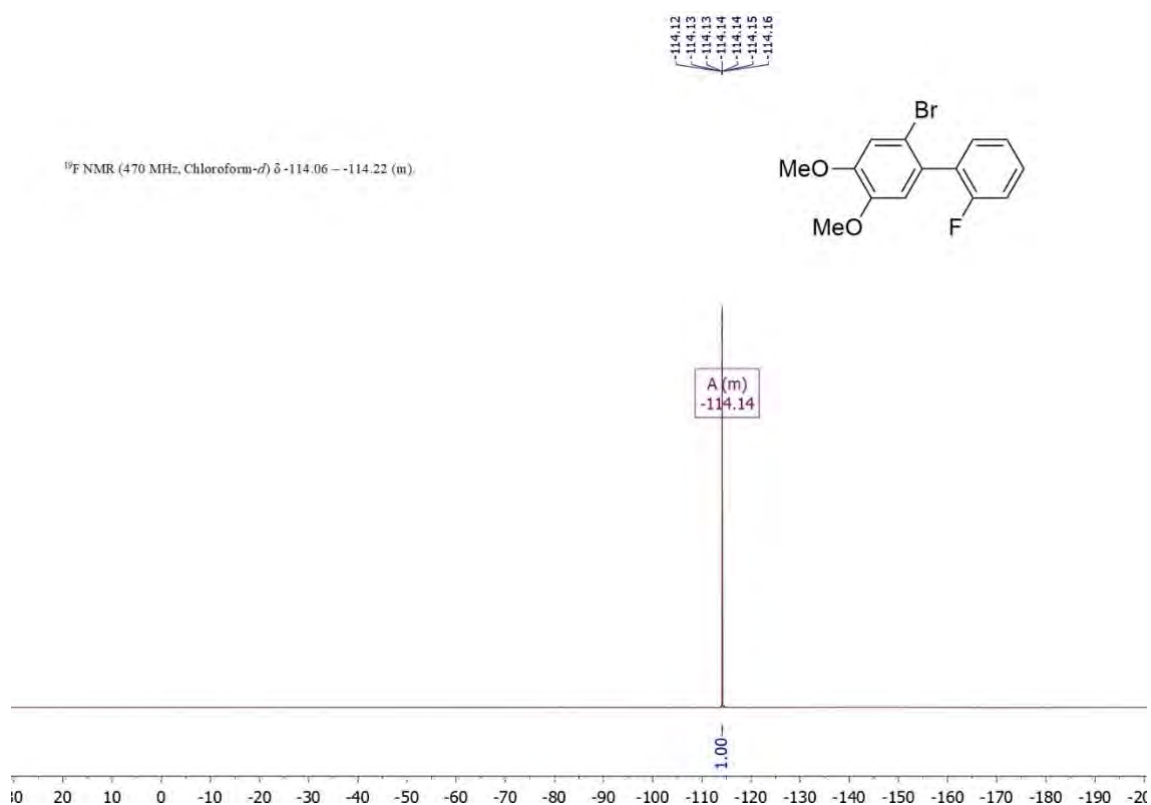

$^{13}\text{C}\{^1\text{H}\}$  NMR Spectra of  $\text{C}_6\text{H}_2\text{Br}(\text{OMe})_2\text{C}_6\text{H}_4\text{F}$  (**9-OMe**) in  $\text{CDCl}_3$ .

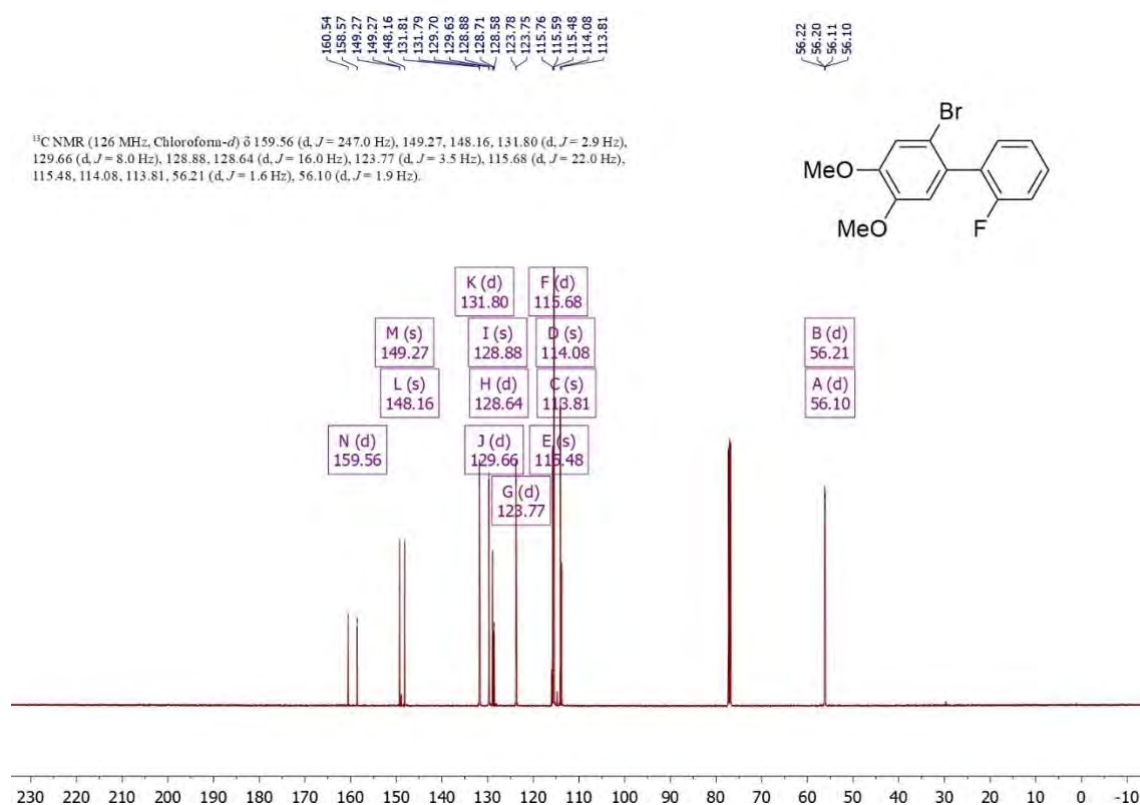

$^1\text{H}$  NMR Spectra of  $\text{PCy}_2\text{C}_6\text{H}_2(\text{OMe})_2\text{C}_6\text{H}_4\text{F}$  (**14**) in  $\text{CDCl}_3$ .

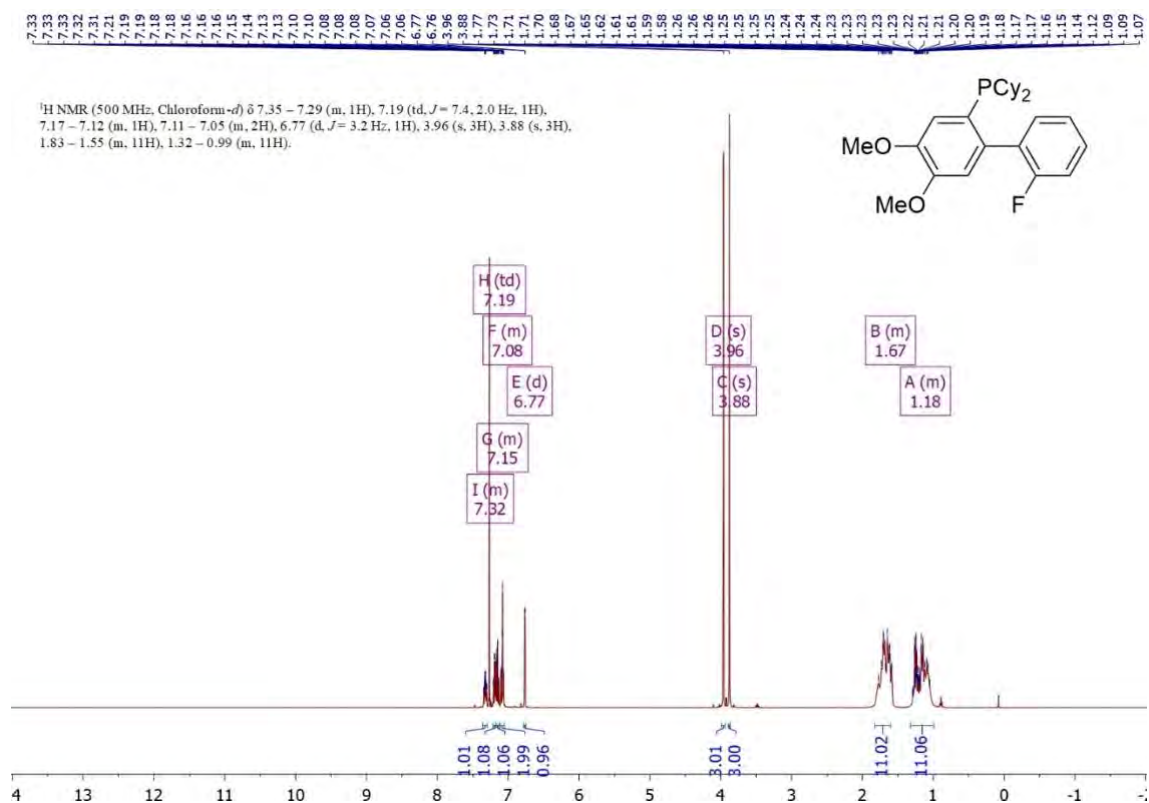

$^{19}\text{F}$  NMR Spectra of  $\text{PCy}_2\text{C}_6\text{H}_2(\text{OMe})_2\text{C}_6\text{H}_4\text{F}$  (**14**) in  $\text{CDCl}_3$ .

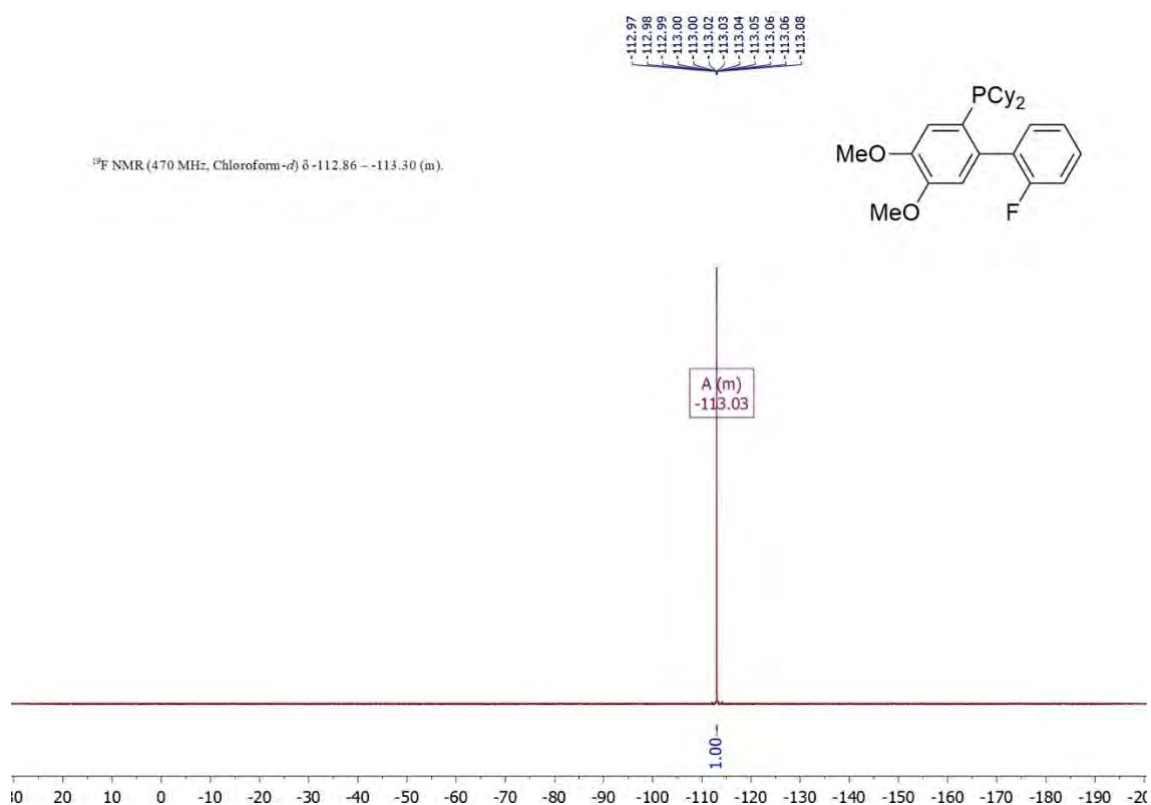

$^{31}\text{P}\{^1\text{H}\}$  NMR Spectra of  $\text{PCy}_2\text{C}_6\text{H}_2(\text{OMe})_2\text{C}_6\text{H}_4\text{F}$  (**14**) in  $\text{CDCl}_3$ .

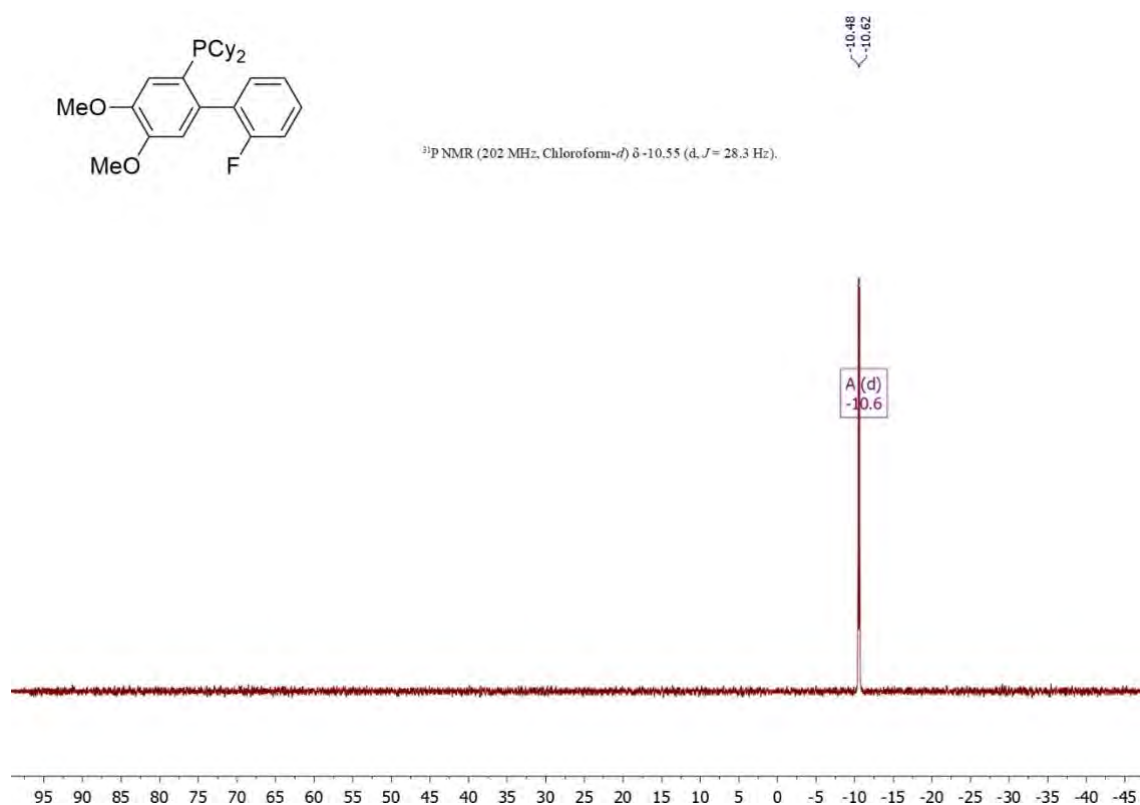

$^{13}\text{C}\{^1\text{H}\}$  NMR Spectra of  $\text{PCy}_2\text{C}_6\text{H}_2(\text{OMe})_2\text{C}_6\text{H}_4\text{F}$  (**14**) in  $\text{CDCl}_3$ .

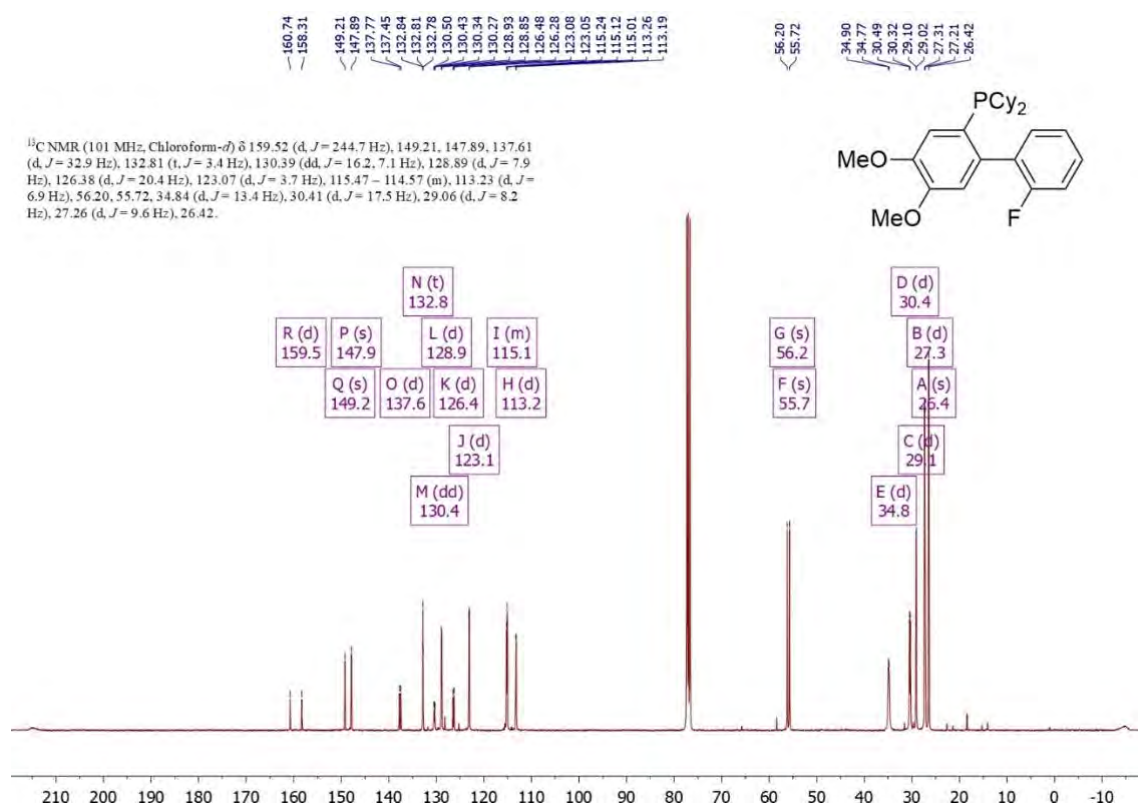

$^1\text{H}$  NMR Spectra of  $\text{PPh}_2\text{C}_6\text{H}_2(\text{OMe})_2\text{C}_6\text{H}_4\text{F}$  (**16**) in  $\text{CDCl}_3$ .

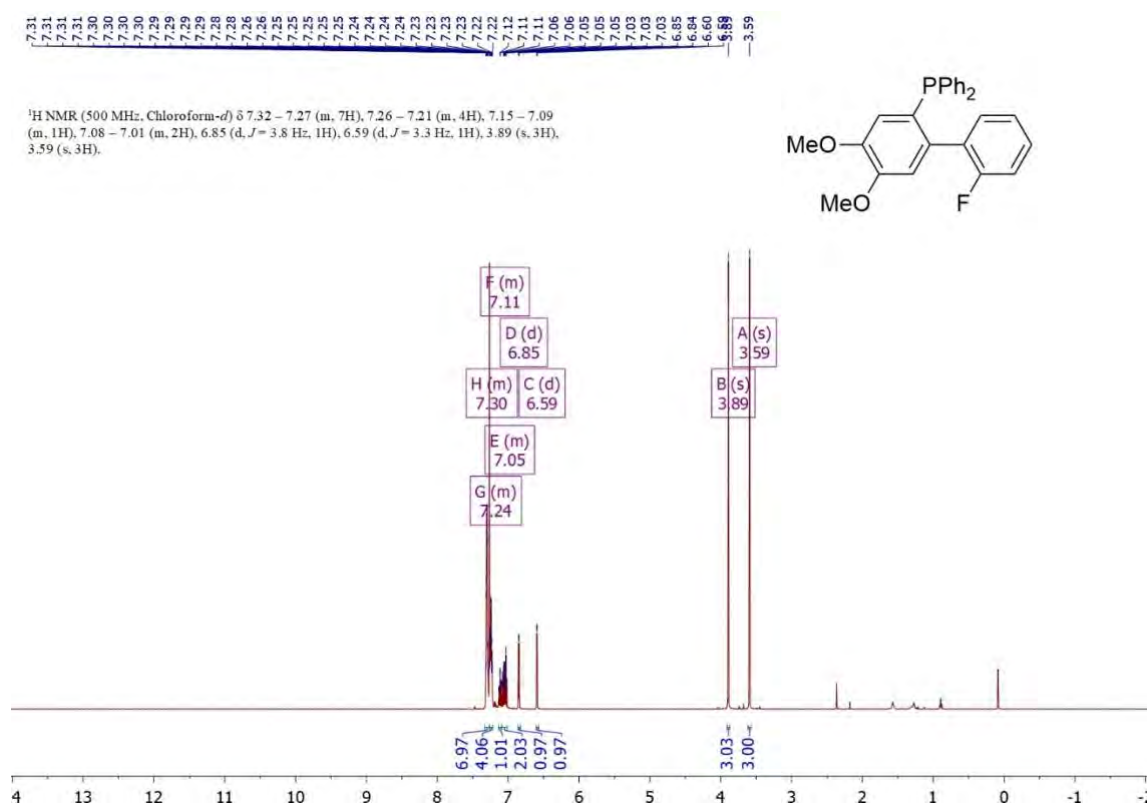

$^{19}\text{F}$  NMR Spectra of  $\text{PPh}_2\text{C}_6\text{H}_2(\text{OMe})_2\text{C}_6\text{H}_4\text{F}$  (**16**) in  $\text{CDCl}_3$ .

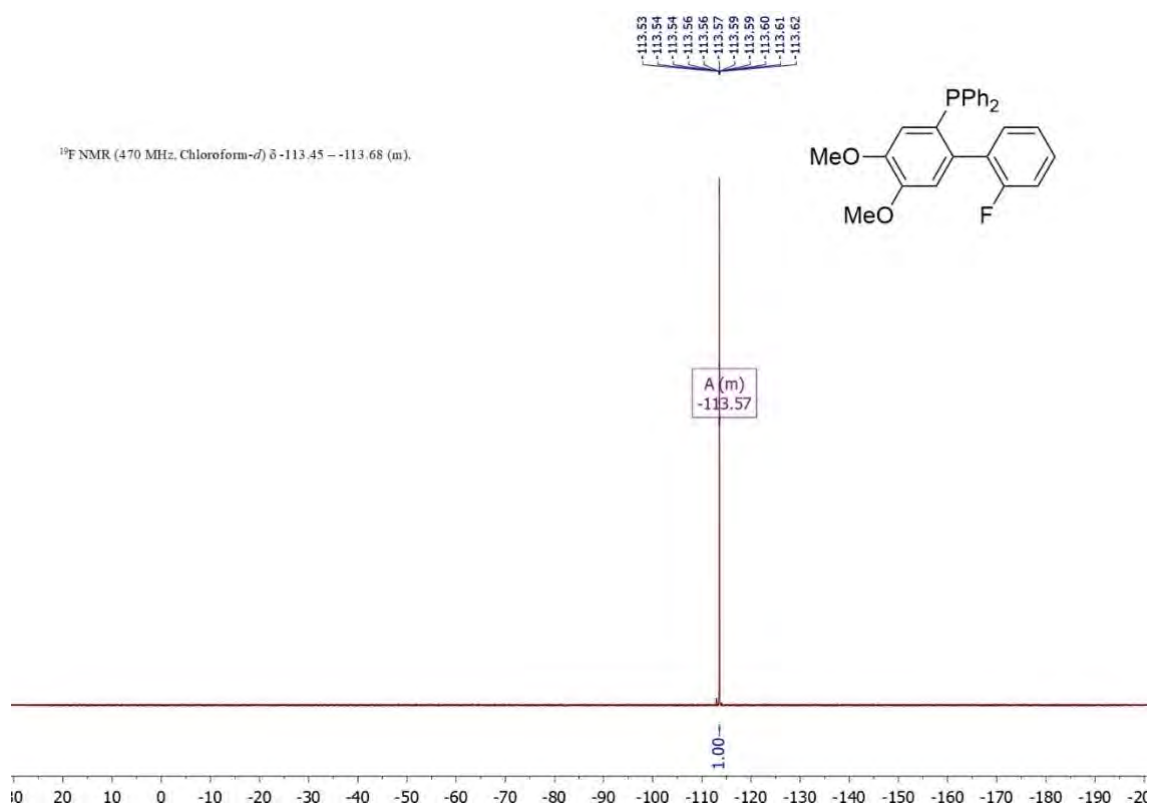

$^{31}\text{P}\{^1\text{H}\}$  NMR Spectra of  $\text{PPh}_2\text{C}_6\text{H}_2(\text{OMe})_2\text{C}_6\text{H}_4\text{F}$  (**16**) in  $\text{CDCl}_3$ .

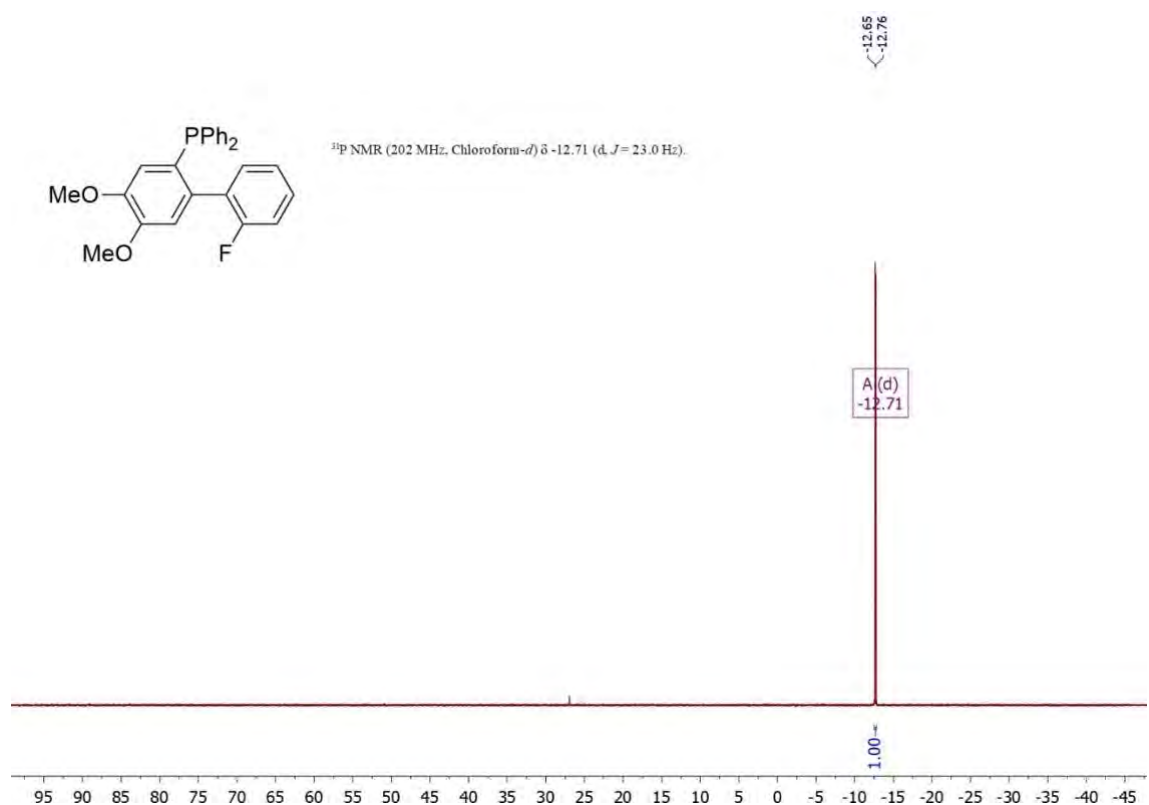

$^{13}\text{C}\{^1\text{H}\}$  NMR Spectra of  $\text{PPh}_2\text{C}_6\text{H}_2(\text{OMe})_2\text{C}_6\text{H}_4\text{F}$  (**16**) in  $\text{CDCl}_3$ .

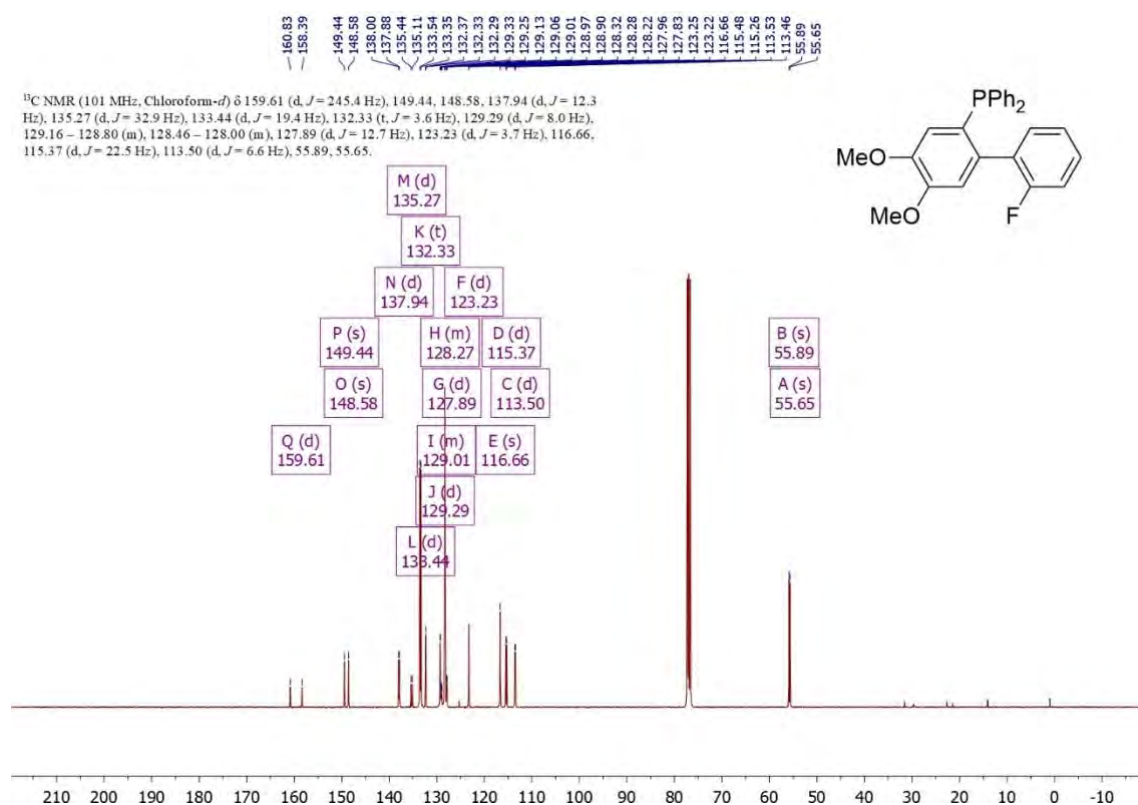

$^1\text{H}$  NMR Spectra of  $[\text{P}(\text{NEt}_2)_2\text{C}_6\text{H}_4\text{C}_6\text{H}_4]\text{Cl}$  (**18-Cl**) in  $\text{CDCl}_3$ .

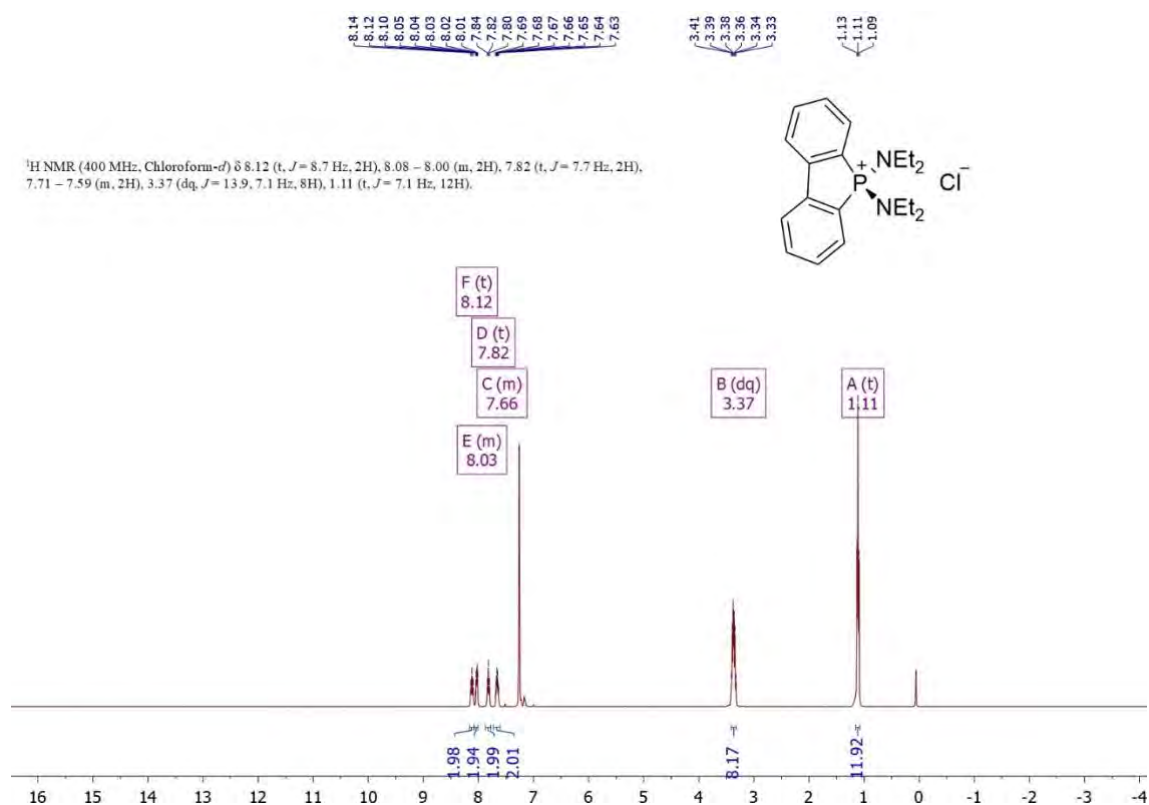

$^{31}\text{P}\{^1\text{H}\}$  NMR Spectra of  $[\text{P}(\text{NEt}_2)_2\text{C}_6\text{H}_4\text{C}_6\text{H}_4]\text{Cl}$  (**18-Cl**) in  $\text{CDCl}_3$ .

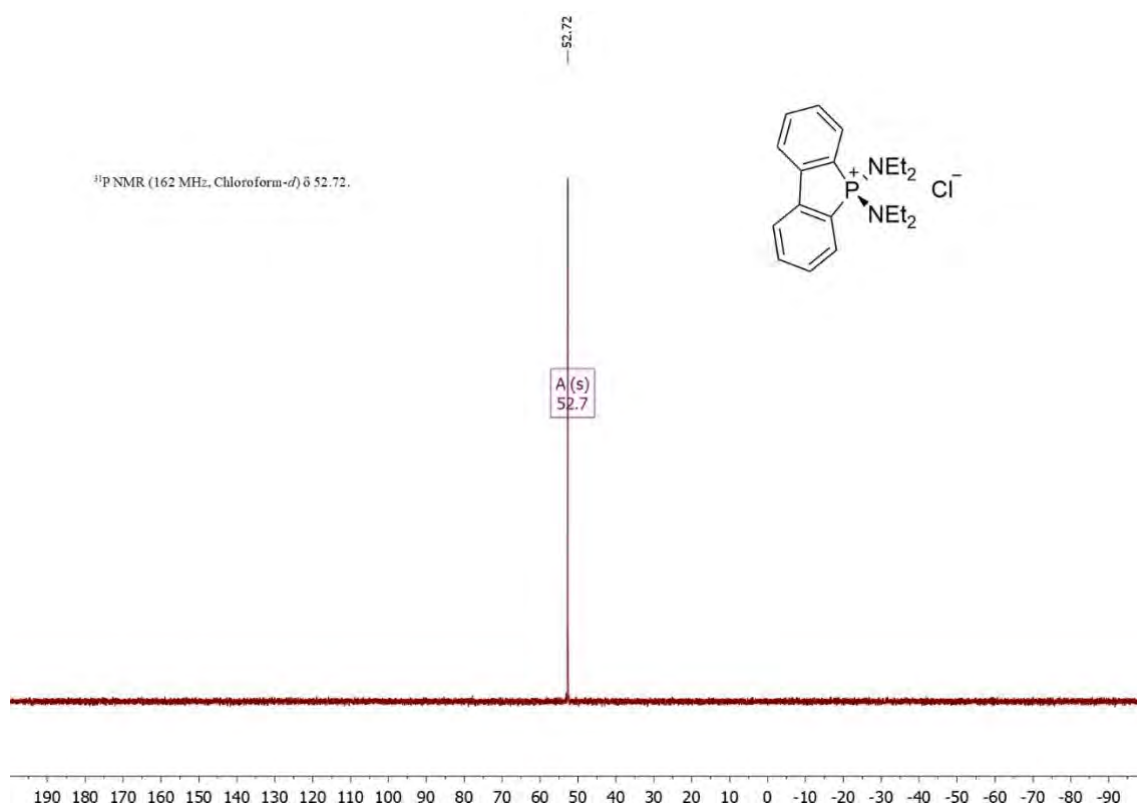

$^1\text{H}$  NMR Spectra of 2,4,6,2',4',6'-hexafluorobiphenyl in  $\text{CDCl}_3$ .

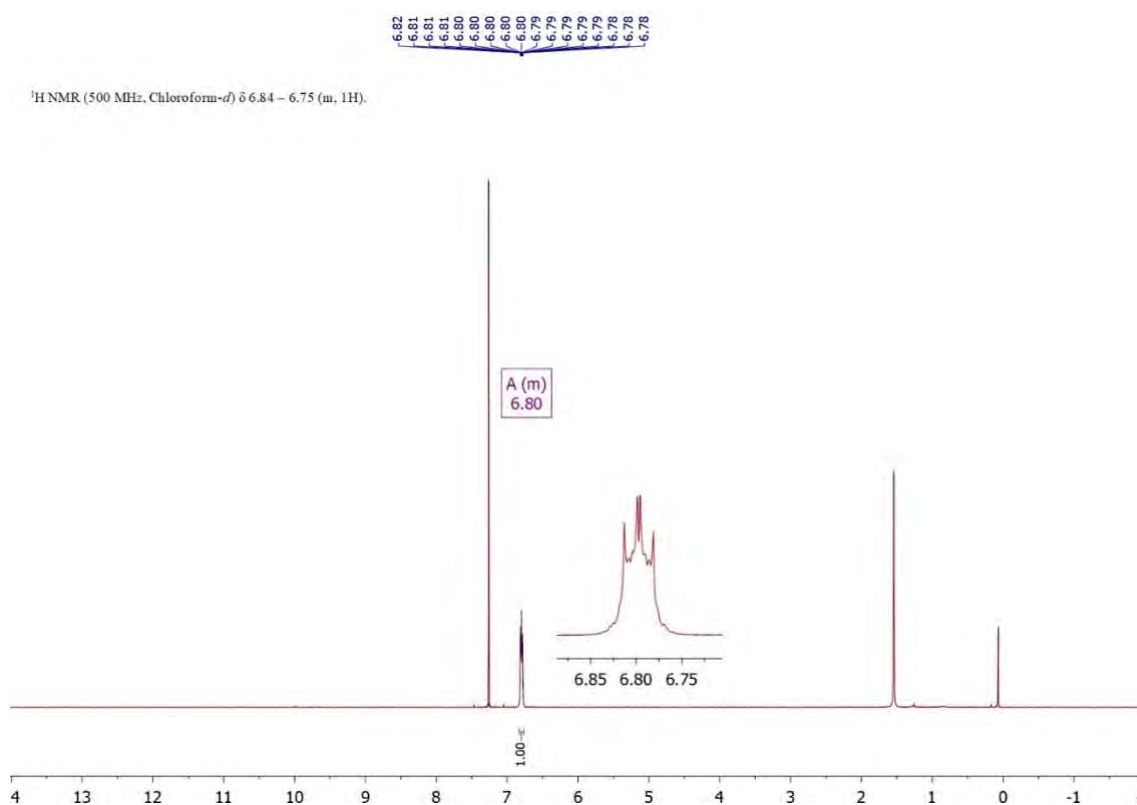

## <sup>19</sup>F NMR Spectra of 2,4,6,2',4',6'-hexafluorobiphenyl in CDCl<sub>3</sub>.

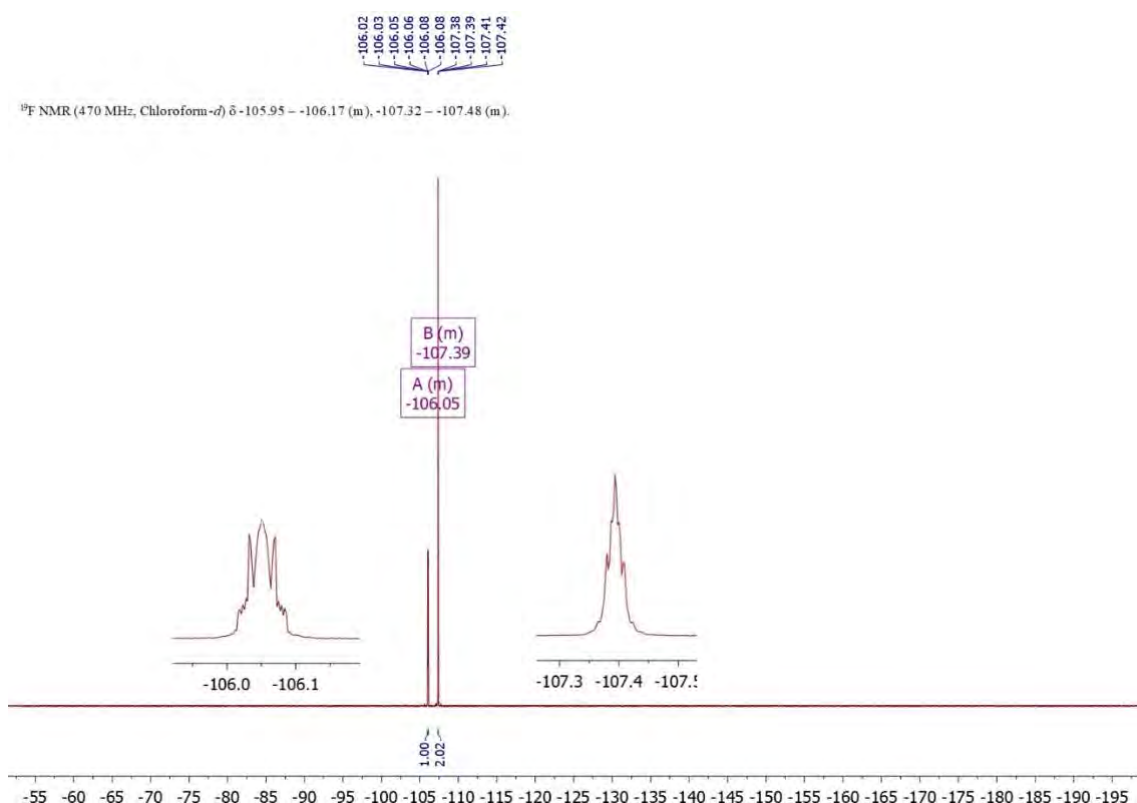

## References

- <sup>1</sup> D. B. G. Williams and M. Lawton, Drying of Organic Solvents: Quantitative Evaluation of the Efficiency of Several Desiccants, *J. Org. Chem.*, 2010, **75**, 8351–8354.
- <sup>2</sup> M. Pérez-Iglesias, R. Infante, J. A. Casares and P. Espinet, The Intriguing Behavior of an Apparently Simple Coupling Promoter Ligand, PPh<sub>2</sub>(p-C<sub>6</sub>H<sub>4</sub>-C<sub>6</sub>F<sub>5</sub>), in their Pd Complexes, *Organometallics*, 2019, **38**, 3688–3695.
- <sup>3</sup> J. Ponce-de-León, R. Infante, M. Pérez-Iglesias and P. Espinet, Fluorinated vs Nonfluorinated PR<sub>2</sub>(biaryl) Ligands and Their [AuCl(L)] Complexes: Synthesis, X-ray Structures, and Computational Study of Weak Interactions. Bond, No Bond, and Beyond, *Inorg. Chem.*, 2020, **59**, 16599–16610.
- <sup>4</sup> T. H. Jepsen; M. Larsen; M. Jørgensen; K. A. Solanko; A. D. Bond; A. Kadziola and M. B. Nielsen, Synthesis of Functionalized Dibenzothiophenes – An Efficient Three-Step Approach Based on Pd-Catalyzed C–C and C–S Bond Formations, *Eur. J. Org. Chem.* 2011, **1**, 53–57.
- <sup>5</sup> C. Amman, P. Meier and A. E. Merbach, A simple multinuclear NMR thermometer, *J. Magn. Reson.*, 1982, **46**, 319–321.
- <sup>6</sup> F. R. Leroux, L. Bonnafoux, C. Heiss, F. Colobert and D. A. Lanfranchi, A Practical Transition Metal-Free Aryl-Aryl Coupling Method: Arynes as Key Intermediates, *Adv. Synth. Catal.*, 2007, **349**, 2705 – 2713.
- <sup>7</sup> Y. P. Budiman, A. Friedrich, U. Radius and T. B. Marder, Copper-Catalysed Suzuki-Miyaura Cross-Coupling of Highly Fluorinated Aryl Boronate Esters with Aryl Iodides and Bromides and Fluoroarene-arene  $\pi$ -Stacking Interactions in the Products, *ChemCatChem*, 2019, **11**, 5387–5396.
- <sup>8</sup> R. Shang, Y. Fu, Y. Wang, Q. Xu, H.-Z. Yu and L. Liu, Copper-Catalyzed Decarboxylative Cross-Coupling of Potassium Polyfluorobenzoates with Aryl Iodides and Bromides, *Angew. Chem. Int. Ed.* 2009, **48**, 9350–9354.
- <sup>9</sup> D. Bulfield and S. Huber, Synthesis of Polyfluorinated Biphenyls; Pushing the Boundaries of Suzuki–Miyaura Cross Coupling with Electron-Poor Substrates, *J. Org. Chem.* 2017, **82**, 13188–13203.

- <sup>10</sup> L. Chen, H. Francis and B. P. Carrow, An “On-Cycle” Precatalyst Enables Room-Temperature Polyfluoroarylation Using Sensitive Boronic Acids, *ACS Catal.*, 2018, **8**, 2989–2994.
- <sup>11</sup> H. Saijo, H. Sakaguchi, M. Ohashi and S. Ogoshi, Base-Free Miyaura Coupling Reaction via a Group 10 Metal Fluoride Intermediate Generated by C–F Bond Activation, *Organometallics*, 2014, **33**, 3669–3672.
- <sup>12</sup> Y. P. Budiman, A. Jayaraman, A. Friedrich, F. Kerner, U. Radius and T. B. Marder, Palladium-Catalyzed Homocoupling of Highly Fluorinated Arylboronates: Studies of the Influence of Strongly vs Weakly Coordinating Solvents on the Reductive Elimination Process, *J. Am. Chem. Soc.*, 2020, **142**, 6036–6050.
- <sup>13</sup> T. Kinzel, Y. Zhang and S. L. Buchwald, A New Palladium Precatalyst Allows for the Fast Suzuki–Miyaura Coupling Reactions of Unstable Polyfluorophenyl and 2-Heteroaryl Boronic Acids, *J. Am. Chem. Soc.*, 2010, **132**, 14073–14075.
- <sup>14</sup> J. Wang, G. Meng, K. Xie, L. Li, H. Sun and Z. Huang, Mild and Efficient Ni-Catalyzed Biaryl Synthesis with Polyfluoroaryl Magnesium Species: Verification of the Arrest State, Uncovering the Hidden Competitive Second Transmetalation and Ligand-Accelerated Highly Selective Monoarylation, *ACS Catal.*, 2017, **7**, 7421–7430.
- <sup>15</sup> L. W. Sardzinski, W. C. Wertjes, A. M. Schnaith and D. Kaliani, Nickel-Catalyzed Decarboxylative Cross-Coupling of Perfluorobenzoates with Aryl Halides and Sulfonates, *Org. Lett.*, 2015, **17**, 1256–1259.
- <sup>16</sup> Q. Chen, A. Wu, S. Qin, M. Zeng, Z. Le, Z. Yan and H. Zhang, Ni-Catalyzed Decarboxylative Cross-Coupling of Potassium Polyfluorobenzoates with Unactivated Phenol and Phenylmethanol Derivatives, *Adv. Synth. Catal.*, 2018, **360**, 3239–3244.
- <sup>17</sup> M. Hofer, E. Gomez-Bengoa and C. Nevado, A Neutral Gold(III)–Boron Transmetalation, *Organometallics*, 2014, **33**, 1328–1332.
- <sup>18</sup> P. Hibner-Kulicka, J. A. Joule, J. Skalka and P. Bałczewski, Recent studies of the synthesis, functionalization, optoelectronic properties and applications of dibenzophospholes, *RSC Adv.*, 2017, **7**, 9194–9236.
- <sup>19</sup> K. Geramita, J. McBee and T. D. Tilley, 2,7-Substituted Hexafluoroheterofluorenes as Potential Building Blocks for Electron Transporting Materials, *J. Org. Chem.*, 2009, **74**, 820–829.
- <sup>20</sup> S. Hoops, S. Sahle, R. Gauges, C. Lee, J. Pahle, N. Simus, M. Singhal, L. Xu, P. Mendes and U. Kummer, COPASI—a COMplex PATHway Simulator, *Bioinformatics*, 2006, **22**, 3067–3074.
- <sup>21</sup> J. Da Chai, M. Head-Gordon, Long-Range Corrected Hybrid Density Functionals with Damped Atom–Atom Dispersion Corrections, *Phys. Chem. Chem. Phys.*, 2008, **10**, 6615–6620.
- <sup>22</sup> Gaussian 16, Revision A.03, M. J. Frisch, G. W. Trucks, H. B. Schlegel, G. E. Scuseria, M. A. Robb, J. R. Cheeseman, G. Scalmani, V. Barone, G. A. Petersson, H. Nakatsuji, X. Li, M. Caricato, A. V. Marenich, J. Bloino, B. G. Janesko, R. Gomperts, B. Mennucci, H. P. Hratchian, J. V. Ortiz, A. F. Izmaylov, J. L. Sonnenberg, D. Williams-Young, F. Ding, F. Lipparini, F. Egidi, J. Goings, B. Peng, A. Petrone, T. Henderson, D. Ranasinghe, V. G. Zakrzewski, J. Gao, N. Rega, G. Zheng, W. Liang, M. Hada, M. Ehara, K. Toyota, R. Fukuda, J. Hasegawa, M. Ishida, T. Nakajima, Y. Honda, O. Kitao, H. Nakai, T. Vreven, K. Throssell, J. A. Montgomery, Jr., J. E. Peralta, F. Ogliaro, M. J. Bearpark, J. J. Heyd, E. N. Brothers, K. N. Kudin, V. N. Staroverov, T. A. Keith, R. Kobayashi, J. Normand, K. Raghavachari, A. P. Rendell, J. C. Burant, S. S. Iyengar, J. Tomasi, M. Cossi, J. M. Millam, M. Klene, C. Adamo, R. Cammi, J. W. Ochterski, R. L. Martin, K. Morokuma, O. Farkas, J. B. Foresman and D. J. Fox, Gaussian, Inc., Wallingford CT, **2016**.
- <sup>23</sup> S. Rohrbach, J. A. Murphy and T. Tuttle, Computational Study on the Boundary Between the Concerted and Stepwise Mechanism of Bimolecular  $S_NAr$  Reactions, *J. Am. Chem. Soc.*, 2020, **142**, 14871–14876.
- <sup>24</sup> A. V. Marenich, C. J. Cramer and D. G. Truhlar, Universal Solvation Model Based on Solute Electron Density and on a Continuum Model of the Solvent Defined by the Bulk Dielectric Constant and Atomic Surface Tensions, *J. Phys. Chem. B*, 2009, **113**, 6378–6396.
- <sup>25</sup> CrysAlisPro Software system, version 1.171.33.51, 2009, Oxford Diffraction Ltd, Oxford, UK.
- <sup>26</sup> O. V. Dolomanov, L. J. Bourhis, R. J. Gildea, J. A. K. Howard and H. Puschmann, IUCr. OLEX2: A Complete Structure Solution, Refinement and Analysis Program, *J. Appl. Crystallogr.*, 2009, **42**, 339–341.
- <sup>27</sup> L. J. Bourhis, O. V. Dolomanov, R. J. Gildea, J. A. K. Howard and H. Puschmann, The anatomy of a comprehensive constrained, restrained refinement program for the modern computing environment – Olex2 dissected, *Acta Cryst.*, 2015, **A71**, 59–75.
- <sup>28</sup> G. M. Sheldrick, Crystal structure refinement with SHELXL, *Acta Cryst.*, 2015, **C71**, 3–8.
